# Supplementary material for: Phylogeography of 27,000 SARS-CoV-2 Genomes: Europe as the Major Source of the COVID-19 Pandemic
Source: MDPI journal article supplement (doi:10.3390/microorganisms8111678), 2020-10-29
Supplement: s1 [file s1]

## **Supplementary material**

### **Phylogeography of 27,000 SARS-CoV-2 genomes: Europe as the major source of the COVID-19 pandemic**

Teresa Rito<sup>1,2</sup>, Martin B. Richards<sup>3</sup>, Maria Pala<sup>3</sup>, Margarida Correia-Neves<sup>1,2</sup>, Pedro Soares<sup>4,5\*</sup>

#### **Affiliations**

<sup>1</sup> Life and Health Sciences Research Institute (ICVS), School of Medicine, University of Minho, Portugal

<sup>2</sup> ICVS/3B's, PT Government Associate Laboratory, Braga/Guimarães, Portugal

<sup>3</sup> Department of Biological and Geographical Sciences, School of Applied Sciences, University of Huddersfield, UK

<sup>4</sup> Centre of Molecular and Environmental Biology (CBMA), Department of Biology, University of Minho, Portugal

<sup>5</sup> Institute of Science and Innovation for Bio-Sustainability (IB-S), University of Minho, Portugal

Supplementary Tables S2 to S3

Supplementary Figures S1 to S57

**Table S2. Major recurrent mutations in the phylogeny of SARS-CoV-2. Occurrences are indicated within a total number of 20,247 mutations.**

| Mutations | Occurrences | 27213  |    | 13     |    | 29200  |   | 10     |   | 29754 |  | 9 |  | 1457 |  | 8 |  |
|-----------|-------------|--------|----|--------|----|--------|---|--------|---|-------|--|---|--|------|--|---|--|
|           |             |        |    |        |    |        |   |        |   |       |  |   |  |      |  |   |  |
| 11083T    | 170         | 15720  | 13 | 21648  | 10 | 884    | 9 | 17010  | 8 |       |  |   |  |      |  |   |  |
| 21575     | 67          | 17410  | 13 | 8090   | 10 | 25658  | 9 | 6781   | 8 |       |  |   |  |      |  |   |  |
| 241       | 56          | 21846  | 13 | 28087  | 10 | 9246   | 9 | 21711  | 8 |       |  |   |  |      |  |   |  |
| 11074     | 42          | 21855  | 12 | 29700  | 10 | 29296  | 9 | 6636   | 8 |       |  |   |  |      |  |   |  |
| 3564T     | 35          | 8790T  | 12 | 26895  | 10 | 18570  | 9 | 3619   | 8 |       |  |   |  |      |  |   |  |
| 3037      | 35          | 11572  | 12 | 2939   | 10 | 16111  | 9 | 14178  | 8 |       |  |   |  |      |  |   |  |
| 16887     | 32          | 15738  | 12 | 8078   | 10 | 26801  | 9 | 27046  | 8 |       |  |   |  |      |  |   |  |
| 21137     | 32          | 6255   | 12 | 26456  | 10 | 2091   | 9 | 15277  | 8 |       |  |   |  |      |  |   |  |
| 24933T    | 29          | 26447  | 12 | 29353  | 10 | 5812   | 9 | 3787   | 8 |       |  |   |  |      |  |   |  |
| 9474      | 28          | 8917   | 12 | 21305  | 10 | 26062T | 9 | 3738   | 8 |       |  |   |  |      |  |   |  |
| 27384     | 28          | 683    | 12 | 21707  | 10 | 20762  | 9 | 29625  | 8 |       |  |   |  |      |  |   |  |
| 10323     | 25          | 5826   | 12 | 5986   | 10 | 13929  | 9 | 6312A  | 8 |       |  |   |  |      |  |   |  |
| 19484     | 25          | 29253  | 12 | 29543T | 10 | 24095T | 9 | 23277  | 8 |       |  |   |  |      |  |   |  |
| 28253     | 23          | 9634T  | 12 | 313    | 10 | 25690T | 9 | 680    | 8 |       |  |   |  |      |  |   |  |
| 14408     | 22          | 21742  | 12 | 7834   | 10 | 26882  | 9 | 11747  | 8 |       |  |   |  |      |  |   |  |
| 23403     | 22          | 7420   | 12 | 10582  | 10 | 18255T | 9 | 29742T | 8 |       |  |   |  |      |  |   |  |
| 9438      | 21          | 1059   | 12 | 27804  | 10 | 21622  | 9 | 29374  | 8 |       |  |   |  |      |  |   |  |
| 29614     | 21          | 19524  | 12 | 27005  | 10 | 28086T | 9 | 21789  | 8 |       |  |   |  |      |  |   |  |
| 28887     | 20          | 13458  | 12 | 26111  | 10 | 20703  | 9 | 7735   | 8 |       |  |   |  |      |  |   |  |
| 28851T    | 20          | 635    | 12 | 13402G | 10 | 19718  | 9 | 4586   | 8 |       |  |   |  |      |  |   |  |
| 1912      | 19          | 13517  | 12 | 25906T | 10 | 25688  | 9 | 7011   | 8 |       |  |   |  |      |  |   |  |
| 1820      | 19          | 3096   | 12 | 26951T | 10 | 29254T | 9 | 3903   | 8 |       |  |   |  |      |  |   |  |
| 28881     | 19          | 7765   | 12 | 28975T | 10 | 29422T | 9 | 25785T | 8 |       |  |   |  |      |  |   |  |
| 28854     | 18          | 16393  | 12 | 16260  | 10 | 20055  | 9 | 21123T | 8 |       |  |   |  |      |  |   |  |
| 26681     | 17          | 16289  | 12 | 11417T | 10 | 15380T | 9 | 1288   | 8 |       |  |   |  |      |  |   |  |
| 29742     | 17          | 22624  | 12 | 3768   | 9  | 24368T | 9 | 22225T | 8 |       |  |   |  |      |  |   |  |
| 29095     | 16          | 25521  | 11 | 24023  | 9  | 28812T | 9 | 1149T  | 8 |       |  |   |  |      |  |   |  |
| 14805     | 16          | 26873  | 11 | 18060  | 9  | 5512   | 9 | 19086T | 8 |       |  |   |  |      |  |   |  |
| 8782      | 16          | 6402   | 11 | 24370  | 9  | 26461  | 9 | 16375  | 8 |       |  |   |  |      |  |   |  |
| 9491      | 16          | 18877  | 11 | 12880  | 9  | 28985T | 9 | 10239A | 8 |       |  |   |  |      |  |   |  |
| 28077T    | 16          | 9479T  | 11 | 23525  | 9  | 14184  | 9 | 5907   | 8 |       |  |   |  |      |  |   |  |
| 515       | 16          | 15324  | 11 | 1190   | 9  | 25855T | 9 | 22713  | 8 |       |  |   |  |      |  |   |  |
| 9430      | 15          | 28708  | 11 | 15960  | 9  | 1437   | 9 | 27703T | 8 |       |  |   |  |      |  |   |  |
| 28311     | 15          | 2110   | 11 | 6040   | 9  | 13536  | 9 | 16616  | 8 |       |  |   |  |      |  |   |  |
| 24034     | 15          | 29733  | 11 | 25844  | 9  | 20268  | 9 | 7279   | 8 |       |  |   |  |      |  |   |  |
| 17766     | 15          | 28093  | 11 | 25511  | 9  | 18744  | 9 | 9165   | 8 |       |  |   |  |      |  |   |  |
| 19017     | 15          | 19269  | 11 | 9223   | 9  | 241C   | 9 | 29585  | 8 |       |  |   |  |      |  |   |  |
| 10369     | 15          | 27741  | 11 | 29218  | 9  | 2536   | 8 | 23868T | 8 |       |  |   |  |      |  |   |  |
| 25916     | 15          | 20178  | 11 | 17747  | 9  | 3177   | 8 | 26256  | 8 |       |  |   |  |      |  |   |  |
| 25904     | 14          | 106    | 11 | 25886  | 9  | 16466  | 8 | 11653  | 8 |       |  |   |  |      |  |   |  |
| 26735     | 14          | 11962  | 11 | 14925  | 9  | 11674  | 8 | 23593T | 8 |       |  |   |  |      |  |   |  |
| 14786     | 14          | 22323  | 11 | 18568  | 9  | 11109  | 8 | 25218T | 8 |       |  |   |  |      |  |   |  |
| 28826     | 14          | 16846T | 11 | 25614  | 9  | 9857   | 8 | 12525  | 8 |       |  |   |  |      |  |   |  |
| 583       | 14          | 6026   | 11 | 7798T  | 9  | 13019  | 8 | 29640  | 8 |       |  |   |  |      |  |   |  |
| 11535T    | 14          | 24378  | 11 | 20148  | 9  | 26527  | 8 | 7936T  | 8 |       |  |   |  |      |  |   |  |
| 21724T    | 14          | 335    | 11 | 17304  | 9  | 1594   | 8 | 29392T | 8 |       |  |   |  |      |  |   |  |
| 10870T    | 14          | 5869   | 11 | 11704  | 9  | 24904  | 8 | 25710  | 8 |       |  |   |  |      |  |   |  |
| 28882     | 14          | 27294  | 11 | 5730   | 9  | 25587  | 8 | 3602   | 8 |       |  |   |  |      |  |   |  |
| 28657     | 13          | 28378T | 11 | 3784   | 9  | 16575  | 8 | 28001T | 8 |       |  |   |  |      |  |   |  |
| 28849     | 13          | 29474T | 11 | 18788  | 9  | 16457  | 8 | 28603  | 8 |       |  |   |  |      |  |   |  |
| 22468T    | 13          | 29769  | 11 | 1218   | 9  | 16750  | 8 | 5497   | 8 |       |  |   |  |      |  |   |  |
| 829       | 13          | 28373T | 11 | 21058  | 9  | 28957  | 8 | 15857  | 8 |       |  |   |  |      |  |   |  |
| 14724     | 13          | 15237  | 11 | 21614  | 9  | 5184   | 8 | 22444  | 8 |       |  |   |  |      |  |   |  |
|           |             | 17678  | 11 | 7423   | 9  | 26013  | 8 | 8651C  | 8 |       |  |   |  |      |  |   |  |
|           |             | 27476  | 11 | 25047  | 9  | 22432  | 8 |        |   |       |  |   |  |      |  |   |  |
|           |             | 21304A | 11 | 9924   | 9  | 11750  | 8 |        |   |       |  |   |  |      |  |   |  |
|           |             | 4158   | 10 | 9967   | 9  | 12213  | 8 |        |   |       |  |   |  |      |  |   |  |
|           |             | 4084   | 10 | 5183   | 9  | 16329  | 8 |        |   |       |  |   |  |      |  |   |  |



**Table S3. Potential inter-continental founders. Sink continent and probable origin of clade are indicated as well as the positioning in the phylogeny. Additionally the first detection of the clade in the sink and elsewhere is indicated.**

| Continent | Clade                   | Variants                                                         | Origin of clade | Frequency in sink dataset | First detection in sink      |            | First detection worldwide    |            |
|-----------|-------------------------|------------------------------------------------------------------|-----------------|---------------------------|------------------------------|------------|------------------------------|------------|
|           |                         |                                                                  |                 |                           | Country                      | Date       | Country                      | Date       |
| Africa    | B7                      | 8782, 28144, 28878, 29742                                        | East Asia       | 2.42                      | Senegal                      | 20/03/2020 | China                        | 23/01/2020 |
| Africa    | A1a                     | 241, 3037, 14408, 23403                                          | Europe          | 6.67                      | South Africa                 | 07/03/2020 | Italy                        | 20/02/2020 |
| Africa    | A1a5                    | 241, 3037, 14408, 15324, 23403                                   | Europe          | 43.64                     | Senegal                      | 13/03/2020 | France/Thailand              | 03/03/2020 |
| Africa    | A1a5+3688               | 241, 3037, 3688, 14408, 15324, 23403                             | Europe          | 1.21                      | South Africa                 | 31/03/2020 | Luxembourg                   | 17/03/2020 |
| Africa    | A1a5+8394, 15277        | 241, 3037, 8394, 14408, 15277, 15324, 23403                      | Europe          | 1.21                      | Democratic Republic of Congo | 26/03/2020 | England                      | 21/03/2020 |
| Africa    | A1a9+8293, 18488, 24739 | 241, 3037, 8293, 14408, 18488, 23403, 24739, 26530               | Europe          | 9.70                      | Democratic Republic of Congo | 14/03/2020 | Democratic Republic of Congo | 14/03/2020 |
| Africa    | A1a2a1                  | 241, 3037, 4002, 10097, 13536, 14408, 23403, 23731, 28881, 28882 | Europe          | 7.88                      | Democratic Republic of Congo | 21/03/2020 | Denmark                      | 02/03/2020 |
| Africa    | A1a1c                   | 241, 2416, 3037, 14408, 23403, 25563T                            | Europe          | 3.64                      | Democratic Republic of Congo | 09/03/2020 | France                       | 29/02/2020 |
| Africa    | A1a1c4                  | 241, 2416, 3037, 8371T, 14408, 23403, 25563T                     | Europe          | 1.82                      | Senegal                      | 20/03/2020 | Slovakia                     | 06/03/2020 |

|           |             |                                                     |              |      |                              |            |             |            |
|-----------|-------------|-----------------------------------------------------|--------------|------|------------------------------|------------|-------------|------------|
| Africa    | A1a1a       | 241, 1059, 3037, 14408, 23403, 25563T               | Europe       | 1.21 | Senegal                      | 17/03/2020 | France      | 21/02/2020 |
| Africa    | A1a1a5a     | 241, 1059, 3037, 13006, 14408, 23403, 25563T, 25688 | Europe       | 2.42 | Senegal                      | 28/02/2020 | Senegal     | 28/02/2020 |
| Africa    | A1a1a+10582 | 241, 1059, 3037, 10582, 14408, 23403, 25563T        | Europe       | 1.82 | Algeria                      | 02/03/2020 | France      | 27/02/2020 |
| Africa    | A5a         | 6312A, 11083T, 13730, 23929, 28311                  | South Asia   | 1.21 | Gambia                       | 21/03/2020 | Taiwan      | 04/03/2020 |
| Africa    | A1a1b2      | 241, 3037, 7765, 14408, 17690, 18877, 23403, 25563T | Western Asia | 1.82 | Democratic Republic of Congo | 18/03/2020 | Israel      | 18/03/2020 |
| East Asia | A2a1a1      | 2480, 2558, 11083T, 14805, 26144T                   | Europe       | 0.28 | Vietnam                      | 17/03/2020 | England     | 09/02/2020 |
| East Asia | A2a1b       | 11083T, 14805, 17247, 26144T                        | Europe       | 0.28 | Taiwan                       | 13/03/2020 | England     | 25/02/2020 |
| East Asia | A2a1b1      | 1515, 9223, 11083T, 14805, 17247, 26144T            | Europe       | 0.28 | Thailand                     | 11/03/2020 | England     | 25/02/2020 |
| East Asia | A3          | 1440, 2891                                          | Europe       | 0.28 | Singapore                    | 17/03/2020 | Germany     | 25/02/2020 |
| East Asia | A1a3c       | 241, 3037, 14408, 20268, 23403, 29734C              | Europe       | 0.38 | Taiwan                       | 17/03/2020 | Spain/USA   | 05/03/2020 |
| East Asia | A1a3a       | 241, 3037, 14408, 20268, 23403, 28854               | Europe       | 0.19 | Thailand                     | Unknown    | USA         | 05/03/2020 |
| East Asia | A1a3        | 241, 3037, 14408, 20268, 23403                      | Europe       | 0.38 | Japan                        | 23/03/2020 | Switzerland | 27/02/2020 |

|           |             |                                              |               |      |               |            |                  |            |
|-----------|-------------|----------------------------------------------|---------------|------|---------------|------------|------------------|------------|
| East Asia | A1a         | 241, 3037, 14408, 23403                      | Europe        | 0.10 | Vietnam       | 07/03/2020 | Italy            | 20/02/2020 |
| East Asia | A1a5        | 241, 3037, 14408, 15324, 23403               | Europe        | 0.47 | Thailand      | 03/03/2020 | France/Thailand  | 03/03/2020 |
| East Asia | A1a9a       | 241, 3037, 4255T, 14408, 23403, 26530        | Europe        | 0.38 | China         | 14/03/2020 | USA              | 05/03/2020 |
| East Asia | A1a2        | 241, 3037, 14408, 23403, 28881, 28882        | Europe        | 4.33 | Thailand      | 03/03/2020 | England          | 23/02/2020 |
| East Asia | A1a2b       | 241, 3037, 14408, 23403, 27046, 28881, 28882 | Europe        | 0.47 | Thailand      | 14/03/2020 | Netherlands      | 24/02/2020 |
| East Asia | A1a2d       | 241, 313, 3037, 14408, 23403, 28881, 28882   | Europe        | 1.88 | Vietnam       | 13/03/2020 | Switzerland      | 27/02/2020 |
| East Asia | A1a1c       | 241, 2416, 3037, 14408, 23403, 25563T        | Europe        | 0.28 | Vietnam       | 15/03/2020 | France           | 29/02/2020 |
| East Asia | A1a1a       | 241, 1059, 3037, 14408, 23403, 25563T        | Europe        | 3.30 | China/Vietnam | 13/03/2020 | France           | 21/02/2020 |
| East Asia | A1a1a+14786 | 241, 1059, 3037, 14408, 14786, 23403, 25563T | Europe        | 0.38 | Thailand      | 18/03/2020 | Iceland          | 09/03/2020 |
| East Asia | B1a1a       | 8782, 17747, 17858, 18060, 24694T, 28144     | North America | 0.38 | Taiwan        | 19/03/2020 | Canada/Australia | 05/03/2020 |
| East Asia | A1a1b       | 241, 3037, 14408, 18877, 23403, 25563T       | North America | 1.13 | Taiwan        | 02/03/2020 | USA/Canada       | 29/02/2020 |
| East Asia | A1a1a+ 1380 | 241, 1059, 1380, 3037, 14408, 23403, 25563T  | North America | 0.19 | Thailand      | 28/03/2020 | USA              | 14/03/2020 |

|           |                    |                                                     |               |       |                |            |                      |            |
|-----------|--------------------|-----------------------------------------------------|---------------|-------|----------------|------------|----------------------|------------|
| East Asia | A1a2+ 11638, 29708 | 241, 3037, 11638, 14408, 23403, 28881, 28882, 29708 | Oceania       | 0.19  | Singapore      | 18/03/2020 | Australia            | 10/03/2020 |
| East Asia | A1a2+25088T        | 241, 3037, 14408, 23403, 25088T, 28881, 28882       | South America | 0.19  | China          | 15/03/2020 | Brazil               | 05/03/2020 |
| East Asia | A5a                | 6312A, 11083T, 13730, 23929, 28311                  | South Asia    | 6.97  | Taiwan         | 04/03/2020 | Taiwan               | 04/03/2020 |
| East Asia | A5a1               | 6310A, 6312A, 11083T, 13730, 19524, 23929, 28311    | South Asia    | 5.08  | Singapore      | 16/03/2020 | Australia            | 13/03/2020 |
| East Asia | A5b+9514           | 1397, 9514, 11083T, 28688, 29742T                   | Western Asia  | 0.47  | China          | 13/03/2020 | United Arab Emirates | 25/02/2020 |
| Europe    | B7                 | 8782, 28144, 28878, 29742                           | East Asia     | 0.03  | Netherlands    | 08/03/2020 | China                | 23/01/2020 |
| Europe    | B                  | 8782, 28144                                         | East Asia     | 0.69  | England        | 29/01/2020 | China                | 05/01/2020 |
| Europe    | Pre-B2             | 8782, 9477A, 28144                                  | East Asia     | 1.24  | France         | 25/02/2020 | China                | 01/02/2020 |
| Europe    | A                  | 0                                                   | East Asia     | 10.45 | Finland/France | 29/01/2020 | China                | 24/12/2019 |
| Europe    | A2                 | 26144T                                              | East Asia     | 0.05  | France         | 23/01/2020 | China                | 21/01/2020 |
| Europe    | A2a                | 11083T, , 26144T                                    | East Asia     | 0.21  | Italy          | 29/01/2020 | China                | 23/01/2020 |
| Europe    | A2a1               | 11083T, 14805, 26144T                               | East Asia     | 13.00 | England        | 25/02/2020 | Korea                | 18/02/2020 |
| Europe    | A5+1190            | 1190, 11083T                                        | East Asia     | 0.01  | France         | 29/01/2020 | France               | 29/01/2020 |

|        |                      |                                                                                        |                  |       |          |            |                  |            |
|--------|----------------------|----------------------------------------------------------------------------------------|------------------|-------|----------|------------|------------------|------------|
| Europe | A5b                  | 1397, 11083T,<br>28688, 29742T                                                         | East<br>Asia     | 0.03  | Sweden   | 27/02/2020 | China            | 18/01/2020 |
| Europe | A7                   | 21707                                                                                  | East<br>Asia     | 0.01  | Poland   | 29/03/2020 | China            | 17/01/2020 |
| Europe | A1                   | 241, 3037, 23403                                                                       | East<br>Asia     | 60.52 | Germany  | 28/01/2020 | China/Germany    | 28/01/2020 |
| Europe | B1a1                 | 8782, 17747,<br>17858, 18060,<br>28144                                                 | North<br>America | 0.04  | England  | 13/03/2020 | USA              | 20/02/2020 |
| Europe | B1a                  | 8782, 17747,<br>17858, 18060,<br>24694T, 28144                                         | North<br>America | 0.10  | Iceland  | 11/03/2020 | Canada/Australia | 05/03/2020 |
| Europe | B3a2                 | 490A, 3177, 8782,<br>18736, 19684T,<br>24034, 26729,<br>27635, 28077C,<br>28144, 29700 | North<br>America | 0.07  | England  | 15/03/2020 | USA              | 05/03/2020 |
| Europe | B7+22468T            | 8782, 22468T,<br>28144, 28878,<br>29742                                                | North<br>America | 0.01  | Russia   | 23/03/2020 | USA              | 06/03/2020 |
| Europe | A2a1a1+ 21575        | 2480, 2558,<br>11083T, 14805,<br>21575, 26144T                                         | North<br>America | 0.05  | England  | 18/03/2020 | USA              | 04/03/2020 |
| Europe | A6                   | 29711T                                                                                 | North<br>America | 0.07  | Iceland  | 16/03/2020 | USA              | 28/02/2020 |
| Europe | A1a3+17639,<br>28638 | 241, 3037, 14408,<br>17639, 20268,<br>23403, 28638                                     | North<br>America | 0.08  | Spain    | 12/03/2020 | Mexico           | 11/03/2020 |
| Europe | A1c1c3               | 241, 2416, 3037,<br>14408, 23403,<br>25563T, 26233T                                    | North<br>America | 0.01  | Slovakia | 07/03/2020 | USA              | 05/03/2020 |
| Europe | A1a1b                | 241, 3037, 14408,<br>18877, 23403,<br>25563T                                           | North<br>America | 0.16  | Greece   | 05/03/2020 | USA/Canada       | 29/02/2020 |

|        |               |                                               |               |      |            |            |           |            |
|--------|---------------|-----------------------------------------------|---------------|------|------------|------------|-----------|------------|
| Europe | A1a1b + 8290  | 241, 3037, 8290, 14408, 18877, 23403, 25563T  | North America | 0.01 | Romania    | 30/04/2020 | USA       | 02/04/2020 |
| Europe | A1a1b + 1918  | 241, 1918, 3037, 14408, 18877, 23403, 25563T  | North America | 0.03 | Wales      | 04/04/2020 | USA       | 24/03/2020 |
| Europe | A1a1a+3253    | 241, 1059, 3037, 3253, 14408, 23403, 25563T   | North America | 0.01 | England    | 28/03/2020 | USA       | 12/03/2020 |
| Europe | A1a1a+ 29614  | 241, 1059, 3037, 14408, 23403, 25563T, 29614  | North America | 0.01 | France     | 02/04/2020 | USA       | 19/03/2020 |
| Europe | A1a1a3        | 241, 1059, 3037, 11916, 14408, 23403, 25563T  | North America | 0.09 | England    | 30/03/2020 | USA       | 05/03/2020 |
| Europe | A1a1a+27384   | 241, 1059, 3037, 14408, 23403, 25563T, 27384  | North America | 0.01 | Luxembourg | 14/04/2020 | USA       | 05/04/2020 |
| Europe | A1a1a+27294   | 241, 1059, 3037, 14408, 23403, 25563T, 27294  | North America | 0.01 | Sweden     | 11/03/2020 | Sweden    | 11/03/2020 |
| Europe | A1a1a+ 21976  | 241, 1059, 3037, 14408, 21976, 23403, 25563T  | North America | 0.03 | Denmark    | 27/03/2020 | USA       | 16/03/2020 |
| Europe | A1a1a+ 10449  | 241, 1059, 3037, 10449, 14408, 23403, 25563T  | North America | 0.01 | Russia     | 23/03/2020 | USA       | 18/03/2020 |
| Europe | A1a1a8        | 241, 1059, 3037, 14408, 20755C, 23403, 25563T | North America | 0.04 | England    | 23/03/2020 | Australia | 09/03/2020 |
| Europe | A1a1a+ 25217T | 241, 1059, 3037, 14408, 23403, 25217T, 25563T | North America | 0.01 | England    | 30/03/2020 | Canada    | 12/03/2020 |

|               |                    |                                                           |               |      |             |            |                      |            |
|---------------|--------------------|-----------------------------------------------------------|---------------|------|-------------|------------|----------------------|------------|
| Europe        | A2a1a1+ 9170       | 2480, 2558, 9170, 11083T, 14805, 26144T                   | Oceania       | 0.01 | England     | 19/03/2020 | Australia            | 07/03/2020 |
| Europe        | A1a2+ 11638, 29708 | 241, 3037, 11638, 14408, 23403, 28881, 28882, 29708       | Oceania       | 0.08 | Netherlands | 16/03/2020 | Australia            | 10/03/2020 |
| Europe        | A1a1b+10507 + 476  | 241, 476, 3037, 10507, 14408, 18877, 23403, 25563T        | South America | 0.03 | England     | 19/04/2020 | Colombia             | 31/03/2020 |
| Europe        | A5a                | 6312A, 11083T, 13730, 23929, 28311                        | South Asia    | 0.03 | England     | 24/03/2020 | Taiwan               | 04/03/2020 |
| Europe        | A5b+884, 8653T     | 884, 1397, 8653T, 11083T, 28688, 29742T                   | Western Asia  | 0.04 | Norway      | 26/02/2020 | Norway               | 26/02/2020 |
| Europe        | A5b+9514           | 1397, 9514, 11083T, 28688, 29742T                         | Western Asia  | 0.01 | Netherlands | 06/03/2020 | United Arab Emirates | 25/02/2020 |
| Europe        | A1a1b2a            | 241, 2113, 3037, 7765, 14408, 17690, 18877, 23403, 25563T | Western Asia  | 0.20 | Belgium     | 14/03/2020 | Belgium              | 14/03/2020 |
| Europe        | A1a1b1             | 241, 3037, 14408, 18877, 23403, 25563T, 26735             | Western Asia  | 0.31 | Denmark     | 11/03/2020 | Saudi Arabia         | 10/03/2020 |
| North America | B                  | 8782, 28144                                               | East Asia     | 0.03 | USA         | 22/01/2020 | China                | 05/01/2020 |
| North America | B+18060            | 8782, 28144, 18060                                        | East Asia     | 0.10 | USA         | 19/01/2020 | USA                  | 19/01/2020 |
| North America | B+29095            | 8782, 28144, 29095                                        | East Asia     | 0.03 | USA         | 22/01/2020 | China                | 10/01/2020 |

|               |            |                                                        |           |       |        |            |               |            |
|---------------|------------|--------------------------------------------------------|-----------|-------|--------|------------|---------------|------------|
| North America | B1         | 8782, 28144, 18060                                     | East Asia | 18.89 | USA    | 19/01/2020 | USA           | 19/01/2020 |
| North America | B3         | 490A, 8782, 24034, 26729, 28077C, 28144                | East Asia | 2.65  | USA    | 21/01/2020 | China         | 15/01/2020 |
| North America | B7         | 8782, 28144, 28878, 29742                              | East Asia | 0.27  | USA    | 06/02/2020 | China         | 23/01/2020 |
| North America | A          | 0                                                      | East Asia | 5.04  | Canada | 23/01/2020 | China         | 24/12/2019 |
| North America | A2a1+5572T | 5572T, 11083T, 14805, 26144T                           | East Asia | 0.03  | USA    | 27/02/2020 | Korea         | 18/02/2020 |
| North America | A2a1       | 11083T, 14805, 26144T,                                 | East Asia | 0.17  | USA    | 27/02/2020 | Korea         | 18/02/2020 |
| North America | A5         | 11083T                                                 | East Asia | 0.17  | USA    | 17/02/2020 | China         | 18/01/2020 |
| North America | A5b        | 1397, 11083T, 28688, 29742T                            | East Asia | 0.27  | Canada | 16/02/2020 | China         | 18/01/2020 |
| North America | A1         | 241, 3037, 23403                                       | East Asia | 0.03  | USA    | 12/03/2020 | China/Germany | 28/01/2020 |
| North America | B4         | 8782, 26088, 28144                                     | Europe    | 0.05  | Mexico | 10/03/2020 | Australia     | 23/02/2020 |
| North America | B4a        | 8782, 17470, 26088, 28144                              | Europe    | 0.03  | Mexico | 04/03/2020 | Chile         | 02/03/2020 |
| North America | B2         | 8782, 9477A, 14805, 23280, 25979T, 28144, 28657, 28863 | Europe    | 0.08  | USA    | 04/03/2020 | France        | 25/02/2020 |
| North America | B7+ 16381  | 8782, 16381, 28144, 28878, 29742                       | Europe    | 0.40  | USA    | 17/03/2020 | Netherlands   | 08/03/2020 |
| North America | A2a1c      | 11083T, 14805, 26144T, 28842T                          | Europe    | 0.03  | USA    | 18/03/2020 | Denmark       | 09/03/2020 |



|               |             |                                          |        |      |     |            |                               |            |
|---------------|-------------|------------------------------------------|--------|------|-----|------------|-------------------------------|------------|
| North America | A2a1c+18086 | 11083T, 14805, 18086, 26144T, 28842T     | Europe | 0.07 | USA | 17/03/2020 | Denmark                       | 09/03/2020 |
| North America | A2a1a       | 2558, 11083T, 14805, 26144T              | Europe | 0.27 | USA | 10/03/2020 | England                       | 28/02/2020 |
| North America | A2a1a1      | 2480, 2558, 11083T, 14805, 26144T        | Europe | 0.32 | USA | 04/03/2020 | England                       | 09/02/2020 |
| North America | A2a1b       | 11083T, 14805, 17247, 26144T             | Europe | 1.06 | USA | 05/03/2020 | England                       | 25/02/2020 |
| North America | A2a1b1      | 1515, 9223, 11083T, 14805, 17247, 26144T | Europe | 0.12 | USA | 11/03/2020 | England                       | 25/02/2020 |
| North America | A3          | 1440, 2891                               | Europe | 0.07 | USA | 05/03/2020 | Germany                       | 25/02/2020 |
| North America | A3b         | 1440, 2891, 7011                         | Europe | 0.05 | USA | 10/03/2020 | Netherlands, Denmark, Austria | 09/03/2020 |
| North America | A4          | 1605delATG                               | Europe | 0.03 | USA | 16/03/2020 | England                       | 05/02/2020 |
| North America | A4a1        | 514, 1605delATG, 17410                   | Europe | 0.07 | USA | 07/03/2020 | Netherlands                   | 27/02/2020 |
| North America | A1a3c       | 241, 3037, 14408, 20268, 23403, 29734C   | Europe | 0.10 | USA | 05/03/2020 | Spain/USA                     | 05/03/2020 |
| North America | A1a3a       | 241, 3037, 14408, 20268, 23403, 28854    | Europe | 0.24 | USA | 05/03/2020 | USA                           | 05/03/2020 |
| North America | A1a3        | 241, 3037, 14408, 20268, 23403           | Europe | 0.49 | USA | 28/02/2020 | Switzerland                   | 27/02/2020 |
| North America | A1a4b       | 241, 3037, 13730, 14408, 23403, 25429T   | Europe | 0.10 | USA | 02/03/2020 | USA                           | 02/03/2020 |
| North America | A1a         | 241, 3037, 14408, 23403                  | Europe | 4.58 | USA | 07/03/2020 | Italy                         | 20/02/2020 |

|               |                          |                                                    |        |      |        |            |                              |            |
|---------------|--------------------------|----------------------------------------------------|--------|------|--------|------------|------------------------------|------------|
| North America | A1a5                     | 241, 3037, 14408, 15324, 23403                     | Europe | 0.13 | USA    | 22/03/2020 | France/Thailand              | 03/03/2020 |
| North America | A1a5+21137               | 241, 3037, 14408, 15324, 21137, 23403              | Europe | 0.12 | USA    | 13/04/2020 | France                       | 21/03/2020 |
| North America | A1a5a                    | 241, 3037, 14408, 15324, 23403, 25433              | Europe | 0.56 | Canada | 09/03/2020 | France                       | 03/03/2020 |
| North America | A1a6                     | 241, 3037, 14408, 23403, 25350                     | Europe | 0.10 | USA    | 12/03/2020 | Australia                    | 22/02/2020 |
| North America | A1a8                     | 187, 241, 3037, 14408, 23403                       | Europe | 0.24 | Canada | 24/02/2020 | Switzerland                  | 24/02/2020 |
| North America | A1a9+ 8293, 18488, 24739 | 241, 3037, 8293, 14408, 18488, 23403, 24739, 26530 | Europe | 0.03 | Canada | 27/03/2020 | Democratic Republic of Congo | 14/03/2020 |
| North America | A1a9a                    | 241, 3037, 4255T, 14408, 23403, 26530              | Europe | 0.07 | USA    | 05/03/2020 | USA                          | 05/03/2020 |
| North America | A1a24                    | 241, 3037, 14408, 23403, 23575, 23587C             | Europe | 0.08 | USA    | 14/03/2020 | Luxembourg                   | 29/02/2020 |
| North America | A1a31                    | 241, 3037, 11083T, 14408, 23403, 25575C            | Europe | 0.05 | USA    | 18/03/2020 | Netherlands                  | 01/03/2020 |
| North America | A1a2+21575               | 241, 3037, 14408, 21575, 23403, 28881, 28882       | Europe | 0.03 | USA    | 01/04/2020 | Portugal                     | 18/03/2020 |
| North America | A1a2 + 10948             | 241, 3037, 10948, 14408, 23403, 28881, 28882       | Europe | 0.15 | USA    | 14/03/2020 | England                      | 11/03/2020 |
| North America | A1a2                     | 241, 3037, 14408, 23403, 28881, 28882              | Europe | 2.01 | USA    | 29/02/2020 | England                      | 23/02/2020 |

|               |                              |                                                                      |        |      |        |            |             |            |
|---------------|------------------------------|----------------------------------------------------------------------|--------|------|--------|------------|-------------|------------|
| North America | A1a1                         | 241, 3037, 14408, 23403, 25563T                                      | Europe | 4.38 | USA    | 02/03/2020 | France      | 26/02/2020 |
| North America | A1a2b                        | 241, 3037, 14408, 23403, 27046, 28881, 28882                         | Europe | 0.07 | USA    | 13/03/2020 | Netherlands | 24/02/2020 |
| North America | A1a2b + 16075T 18689A 20031A | 241, 3037, 14408, 16075T, 18689A, 20031A, 23403, 27046, 28881, 28882 | Europe | 0.03 | USA    | 13/03/2020 | Scotland    | 11/03/2020 |
| North America | A1a2d                        | 241, 313, 3037, 14408, 23403, 28881, 28882                           | Europe | 0.47 | USA    | 28/02/2020 | Switzerland | 27/02/2020 |
| North America | A1a2d +18826T                | 241, 313, 3037, 14408, 18826T, 23403, 28881, 28882                   | Europe | 0.03 | USA    | 17/03/2020 | Chile       | 10/03/2020 |
| North America | A1a2b+29614                  | 241, 313, 3037, 14408, 23403, 28881, 28882, 29164                    | Europe | 0.07 | USA    | 17/03/2020 | USA         | 17/03/2020 |
| North America | A1a2a1                       | 241, 3037, 4002, 10097, 13536, 14408, 23403, 23731, 28881, 28882     | Europe | 0.07 | USA    | 10/03/2020 | Denmark     | 02/03/2020 |
| North America | A1a2c                        | 241, 3037, 14408, 19839, 23403, 28881, 28882                         | Europe | 0.08 | USA    | 02/03/2020 | Switzerland | 26/02/2020 |
| North America | A1a2h + 28077T               | 241, 3037, 14408, 19170, 19509, 23403, 28077T, 28881, 28882          | Europe | 0.03 | Canada | 14/03/2020 | Canada      | 14/03/2020 |

|               |              |                                                     |        |       |        |            |             |            |
|---------------|--------------|-----------------------------------------------------|--------|-------|--------|------------|-------------|------------|
| North America | A1a2+ 25521  | 241, 3037, 14408, 23403, 25521, 28881, 28882        | Europe | 0.03  | USA    | 13/04/2020 | England     | 02/04/2020 |
| North America | A1a2g        | 241, 3037, 14408, 14786, 23403, 28881, 28882        | Europe | 0.08  | USA    | 14/03/2020 | USA         | 14/03/2020 |
| North America | A1a2ak       | 241, 3037, 10265, 14408, 23403, 28881, 28882        | Europe | 0.17  | USA    | 11/03/2020 | Germany     | 25/02/2020 |
| North America | A1a2e        | 241, 3037, 3373A, 14408, 23403, 28881, 28882        | Europe | 0.07  | Canada | 10/03/2020 | Switzerland | 27/02/2020 |
| North America | A1a1c        | 241, 2416, 3037, 14408, 23403, 25563T               | Europe | 2.04  | USA    | 04/03/2020 | France      | 29/02/2020 |
| North America | A1a1a        | 241, 1059, 3037, 14408, 23403, 25563T               | Europe | 49.15 | USA    | 02/03/2020 | France      | 21/02/2020 |
| North America | A1a1a+25585  | 241, 1059, 3037, 14408, 23403, 25563T, 25585        | Europe | 0.19  | USA    | 01/04/2020 | Germany     | 11/03/2020 |
| North America | A1a1a+14786  | 241, 1059, 3037, 14408, 14786, 23403, 25563T        | Europe | 0.03  | USA    | 16/03/2020 | Iceland     | 09/03/2020 |
| North America | A1a1a5a      | 241, 1059, 3037, 13006, 14408, 23403, 25563T, 25688 | Europe | 0.07  | USA    | 29/02/2020 | Senegal     | 28/02/2020 |
| North America | A1a1a+21697A | 241, 1059, 3037, 14408, 21697A, 23403, 25563T       | Europe | 0.03  | USA    | 05/04/2020 | Germany     | 16/03/2020 |
| North America | A1a1a+10582  | 241, 1059, 3037, 10582, 14408, 23403, 25563T        | Europe | 0.22  | USA    | 27/03/2020 | France      | 27/02/2020 |

|               |                |                                                        |               |      |             |            |                      |            |
|---------------|----------------|--------------------------------------------------------|---------------|------|-------------|------------|----------------------|------------|
| North America | A1a1a14        | 241, 1059, 11083T, 14408, 23403, 25563T                | Europe        | 0.42 | USA         | 13/03/2020 | Czech Republic       | 08/03/2020 |
| North America | A5b+29742T!    | 1397, 11083T, 28688                                    | Oceania       | 0.03 | Canada      | 04/03/2020 | Australia            | 03/03/2020 |
| North America | A1a2w1         | 241, 3037, 14408, 23403, 27299, 28881, 28882, 29148    | South America | 0.13 | Canada      | 07/03/2020 | Canada               | 07/03/2020 |
| North America | A5a            | 6312A, 11083T, 13730, 23929, 28311                     | South Asia    | 0.19 | USA         | 11/03/2020 | Taiwan               | 04/03/2020 |
| North America | A5b+884, 8653T | 884, 1397, 8653T, 11083T, 28688, 29742T                | Western Asia  | 0.17 | Canada      | 02/03/2020 | Norway               | 26/02/2020 |
| North America | A5b+9514       | 1397, 9514, 11083T, 28688, 29742T                      | Western Asia  | 0.05 | Canada      | 11/03/2020 | United Arab Emirates | 25/02/2020 |
| Oceania       | B7             | 8782, 28144, 28878, 29742                              | East Asia     | 0.50 | Australia   | 28/01/2020 | China                | 23/01/2020 |
| Oceania       | B              | 8782, 28144                                            | East Asia     | 0.25 | Australia   | 24/01/2020 | China                | 05/01/2020 |
| Oceania       | A              | 0                                                      | East Asia     | 0.99 | Australia   | 22/01/2020 | China                | 24/12/2019 |
| Oceania       | A2             | 26144T                                                 | East Asia     | 0.33 | Australia   | 24/01/2020 | China                | 21/01/2020 |
| Oceania       | A5             | 11083T                                                 | East Asia     | 0.25 | Australia   | 21/02/2020 | China                | 18/01/2020 |
| Oceania       | A5b            | 1397, 11083T, 28688, 29742T                            | East Asia     | 5.96 | New Zealand | 05/03/2020 | China                | 18/01/2020 |
| Oceania       | B2             | 8782, 9477A, 14805, 23280, 25979T, 28144, 28657, 28863 | Europe        | 0.25 | Australia   | 20/03/2020 | France               | 25/02/2020 |

|         |                  |                                                              |        |      |             |            |                               |            |
|---------|------------------|--------------------------------------------------------------|--------|------|-------------|------------|-------------------------------|------------|
| Oceania | B2a1             | 4540, 8782, 9477A, 14805, 25979T, 28144, 28311, 28657, 28863 | Europe | 5.46 | Australia   | 16/03/2020 | England                       | 26/03/2020 |
| Oceania | B4               | 8782, 26088, 28144                                           | Europe | 0.33 | Australia   | 23/02/2020 | Australia                     | 23/02/2020 |
| Oceania | A2a1d+1368, 6990 | 1368, 6990, 11083T, 14805, 23707, 26144T                     | Europe | 0.66 | Australia   | 13/03/2020 | Australia                     | 13/03/2020 |
| Oceania | A2a1d            | 11083T, 14805, 23707, 26144T                                 | Europe | 0.17 | Australia   | 23/03/2020 | England                       | 27/02/2020 |
| Oceania | A2a1c            | 11083T, 14805, 26144T, 28842T                                | Europe | 0.17 | Australia   | 18/03/2020 | Denmark                       | 09/03/2020 |
| Oceania | A2a1e            | 11083T, 13627T, 14805, 15540, 26144T, 28338                  | Europe | 1.82 | New Zealand | 11/03/2020 | England/New Zealand           | 11/03/2020 |
| Oceania | A2a1a1           | 2480, 2558, 11083T, 14805, 26144T                            | Europe | 2.56 | Australia   | 07/03/2020 | England                       | 09/02/2020 |
| Oceania | A2a1b            | 11083T, 14805, 17247, 26144T                                 | Europe | 1.41 | Australia   | 08/03/2020 | England                       | 25/02/2020 |
| Oceania | A2a1b1           | 1515, 9223, 11083T, 14805, 17247, 26144T                     | Europe | 0.91 | Australia   | 08/03/2020 | England                       | 25/02/2020 |
| Oceania | A2a1b3           | 7479, 11083T, 14805, 17247, 25572, 26144T, 28887             | Europe | 0.17 | Australia   | 20/03/2020 | Scotland                      | 17/03/2020 |
| Oceania | A3               | 1440, 2891                                                   | Europe | 0.25 | Australia   | 23/03/2020 | Germany                       | 25/02/2020 |
| Oceania | A3b              | 1440, 2891, 7011                                             | Europe | 0.58 | Australia   | 10/03/2020 | Netherlands, Denmark, Austria | 09/03/2020 |
| Oceania | A3c              | 1440, 2891, 27669                                            | Europe | 0.25 | Australia   | 22/03/2020 | England                       | 12/03/2020 |

|         |                      |                                        |        |      |           |            |                 |            |
|---------|----------------------|----------------------------------------|--------|------|-----------|------------|-----------------|------------|
| Oceania | A4                   | 1605delATG                             | Europe | 0.41 | Australia | 16/03/2020 | England         | 05/02/2020 |
| Oceania | A4+1904, 8090, 10789 | 1605delATG, 1904, 8090, 10789          | Europe | 0.58 | Australia | 27/03/2020 | England         | 12/03/2020 |
| Oceania | A1a3f                | 241, 2937, 3037, 14408, 20268, 23403   | Europe | 0.17 | Australia | 01/04/2020 | England         | 21/03/2020 |
| Oceania | A1a3+ 25483          | 241, 3037, 14408, 20268, 23403, 25483  | Europe | 0.33 | Australia | 13/03/2020 | Australia       | 13/03/2020 |
| Oceania | A1a3c                | 241, 3037, 14408, 20268, 23403, 29734C | Europe | 0.33 | Australia | 15/03/2020 | Spain/USA       | 05/03/2020 |
| Oceania | A1a3a                | 241, 3037, 14408, 20268, 23403, 28854  | Europe | 0.66 | Australia | 15/03/2020 | USA             | 05/03/2020 |
| Oceania | A1a3                 | 241, 3037, 14408, 20268, 23403         | Europe | 1.90 | Australia | 17/03/2020 | Switzerland     | 27/02/2020 |
| Oceania | A1a4                 | 241, 3037, 14408, 23403, 25429T        | Europe | 0.33 | Australia | 20/03/2020 | USA             | 02/03/2020 |
| Oceania | A1a4a                | 241, 3037, 14408, 16289, 23403, 25429T | Europe | 0.17 | Australia | 20/03/2020 | England         | 12/03/2020 |
| Oceania | A1a                  | 241, 3037, 14408, 23403                | Europe | 7.28 | Australia | 10/03/2020 | Italy           | 20/02/2020 |
| Oceania | A1a5                 | 241, 3037, 14408, 15324, 23403         | Europe | 1.16 | Australia | 18/03/2020 | France/Thailand | 03/03/2020 |
| Oceania | A1a5+28690T          | 241, 3037, 14408, 15324, 23403, 28690T | Europe | 0.33 | Australia | 23/03/2020 | Luxembourg      | 17/03/2020 |
| Oceania | A1a6                 | 241, 3037, 14408, 23403, 25350         | Europe | 0.74 | Australia | 22/02/2020 | Australia       | 22/02/2020 |
| Oceania | A1a8                 | 187, 241, 3037, 14408, 23403           | Europe | 0.25 | Australia | 22/03/2020 | Switzerland     | 24/02/2020 |

|         |                  |                                                                                |        |      |             |            |             |             |
|---------|------------------|--------------------------------------------------------------------------------|--------|------|-------------|------------|-------------|-------------|
| Oceania | A1a9             | 241, 3037, 14408, 23403, 26530                                                 | Europe | 1.08 | Australia   | 11/03/2020 | England     | 26/02/2020  |
| Oceania | A1a11            | 241, 3037, 14408, 23403, 29353                                                 | Europe | 5.96 | Australia   | 18/03/2020 | Australia   | 18/03/2020  |
| Oceania | A1a20            | 241, 3037, 14408, 23403, 24862                                                 | Europe | 0.25 | Australia   | 24/03/2020 | Netherlands | Netherlands |
| Oceania | A1a2             | 241, 3037, 14408, 23403, 28881, 28882                                          | Europe | 7.78 | New Zealand | 02/03/2020 | England     | 23/02/2020  |
| Oceania | A1a1+1594, 11109 | 241, 1594, 3037, 11109, 14408, 23403, 25563T                                   | Europe | 0.74 | Australia   | 31/03/2020 | Netherlands | 16/03/2020  |
| Oceania | A1a2b            | 241, 3037, 14408, 23403, 27046, 28881, 28882                                   | Europe | 0.66 | Australia   | 21/03/2020 | Netherlands | 24/02/2020  |
| Oceania | A1a2b+1514       | 241, 1514, 3037, 14408, 23403, 27046, 28881, 28882                             | Europe | 0.17 | Australia   | 28/03/2020 | England     | 04/03/2020  |
| Oceania | A1a2d            | 241, 313, 3037, 14408, 23403, 28881, 28882                                     | Europe | 0.50 | Australia   | 16/03/2020 | Switzerland | 27/02/2020  |
| Oceania | A1a2a1b          | 241, 3037, 4002, 10097, 13536, 14184, 14408, 21058, 23403, 23731, 28881, 28882 | Europe | 0.17 | Australia   | 21/03/2020 | Vietnam     | 15/03/2020  |
| Oceania | A1a2a1           | 241, 3037, 4002, 10097, 13536, 14408, 23403, 23731, 28881, 28882               | Europe | 0.25 | Australia   | 21/03/2020 | Denmark     | 02/03/2020  |



|         |                |                                                             |        |      |           |            |             |            |
|---------|----------------|-------------------------------------------------------------|--------|------|-----------|------------|-------------|------------|
| Oceania | A1a2c          | 241, 3037, 14408, 19839, 23403, 28881, 28882                | Europe | 0.33 | Australia | 08/03/2020 | Switzerland | 26/02/2020 |
| Oceania | A1a2h + 28077T | 241, 3037, 14408, 19170, 19509, 23403, 28077T, 28881, 28882 | Europe | 0.17 | Australia | 27/03/2020 | Canada      | 14/03/2020 |
| Oceania | A1a2+8102T     | 241, 3037, 8102T, 14408, 23403, 28881, 28882                | Europe | 0.58 | Australia | 30/03/2020 | Australia   | 30/03/2020 |
| Oceania | A1a2g          | 241, 3037, 14408, 14786, 23403, 28881, 28882                | Europe | 0.17 | Australia | 20/03/2020 | USA         | 14/03/2020 |
| Oceania | A1a2ak         | 241, 3037, 10265, 14408, 23403, 28881, 28882                | Europe | 0.17 | Australia | 19/03/2020 | Germany     | 25/02/2020 |
| Oceania | A1a2e          | 241, 3037, 3373A, 14408, 23403, 28881, 28882                | Europe | 0.50 | Australia | 18/03/2020 | Switzerland | 27/02/2020 |
| Oceania | A1a2e1         | 241, 3037, 3373A, 11195, 14408, 23403, 28881, 28882         | Europe | 0.17 | Australia | 23/03/2020 | England     | 12/03/2020 |
| Oceania | A1a2r          | 241, 3037, 14408, 23403, 27281T, 28881, 28882               | Europe | 0.17 | Australia | 21/03/2020 | England     | 18/03/2020 |
| Oceania | A1a2x          | 241, 3037, 6573, 14408, 23403, 25528, 28881, 28882          | Europe | 0.41 | Australia | 27/03/2020 | England     | 18/03/2020 |
| Oceania | A1a2v          | 241, 3037, 14408, 21724T, 23403, 28881, 28882,              | Europe | 0.25 | Australia | 22/03/2020 | England     | 17/03/2020 |

|         |            |                                                      |               |      |           |            |                |            |
|---------|------------|------------------------------------------------------|---------------|------|-----------|------------|----------------|------------|
| Oceania | A1a1c      | 241, 2416, 3037, 14408, 23403, 25563T                | Europe        | 0.17 | Australia | 17/03/2020 | France         | 29/02/2020 |
| Oceania | A1a1c1     | 241, 2416, 3037, 14408, 20578T, 23403, 25563T        | Europe        | 0.66 | Australia | 19/03/2020 | England        | 09/03/2020 |
| Oceania | A1a1c1a    | 241, 2416, 3037, 14408, 14786, 20578T, 23403, 25563T | Europe        | 0.25 | Australia | 16/03/2020 | Australia      | 16/03/2020 |
| Oceania | A1a1c4     | 241, 2416, 3037, 8371T, 14408, 23403, 25563T         | Europe        | 0.25 | Australia | 20/03/2020 | Slovakia       | 06/03/2020 |
| Oceania | A1a1a      | 241, 1059, 3037, 14408, 23403, 25563T                | Europe        | 9.93 | Australia | 10/03/2020 | France         | 21/02/2020 |
| Oceania | A1a1a5a    | 241, 1059, 3037, 13006, 14408, 23403, 25563T, 25688  | Europe        | 0.17 | Australia | 19/03/2020 | Senegal        | 28/02/2020 |
| Oceania | A1a1a7     | 241, 1059, 3037, 14408, 15380T, 23403, 25563T        | Europe        | 0.17 | Australia | 20/03/2020 | Denmark        | 08/03/2020 |
| Oceania | A1a1a14    | 241, 1059, 11083T, 14408, 23403, 25563T              | Europe        | 0.17 | Australia | 27/03/2020 | Czech Republic | 08/03/2020 |
| Oceania | B1a1       | 8782, 17747, 17858, 18060, 28144                     | North America | 2.23 | Australia | 11/03/2020 | USA            | 20/02/2020 |
| Oceania | B1a1+10771 | 8782, 10771, 17747, 17858, 18060, 28144              | North America | 0.17 | Australia | 11/03/2020 | Canada         | 07/03/2020 |

|         |                        |                                                                                  |               |      |           |            |                  |            |
|---------|------------------------|----------------------------------------------------------------------------------|---------------|------|-----------|------------|------------------|------------|
| Oceania | B1a1a                  | 8782, 17747, 17858, 18060, 24694T, 28144                                         | North America | 4.71 | Australia | 05/03/2020 | Canada/Australia | 05/03/2020 |
| Oceania | B3a2                   | 490A, 3177, 8782, 18736, 19684T, 24034, 26729, 27635, 28077C, 28144, 29700       | North America | 2.56 | Australia | 07/03/2020 | USA              | 05/03/2020 |
| Oceania | B3a2a                  | 490A, 3177, 6285, 8782, 15960, 18736, 19684T, 24034, 27635, 28077C, 28144, 29700 | North America | 0.91 | Australia | 24/03/2020 | USA              | 17/03/2020 |
| Oceania | B7 + 2676, 22606T      | 2676, 8782, 22606T, 28144, 28878, 29742                                          | North America | 0.17 | Australia | 17/03/2020 | USA              | 12/03/2020 |
| Oceania | A1a1+8389              | 241, 3037, 8389, 14408, 23403, 25563T                                            | North America | 0.25 | Australia | 26/03/2020 | USA              | 02/03/2020 |
| Oceania | A1c1c3 + 12112, 21974C | 241, 2416, 3037, 12112, 14408, 21974C, 23403, 25563T, 26233T                     | North America | 0.50 | Australia | 27/03/2020 | USA              | 22/03/2020 |
| Oceania | A1a1b                  | 241, 3037, 14408, 18877, 23403, 25563T                                           | North America | 0.74 | Australia | 17/03/2020 | USA/Canada       | 29/02/2020 |
| Oceania | A1a1a2                 | 241, 1059, 3037, 14408, 23403, 25563T, 27964                                     | North America | 1.08 | Australia | 24/03/2020 | USA              | 08/03/2020 |
| Oceania | A1a1a3                 | 241, 1059, 3037, 11916, 14408, 23403, 25563T                                     | North America | 0.25 | Australia | 20/03/2020 | USA              | 05/03/2020 |

|         |                 |                                                          |               |      |           |            |           |            |
|---------|-----------------|----------------------------------------------------------|---------------|------|-----------|------------|-----------|------------|
| Oceania | A1a1a+ 21648    | 241, 1059, 3037, 14408, 21648, 23403, 25563T             | North America | 0.58 | Australia | 21/03/2020 | USA       | 09/03/2020 |
| Oceania | A1a1a8          | 241, 1059, 3037, 14408, 20755C, 23403, 25563T            | North America | 0.58 | Australia | 09/03/2020 | Australia | 09/03/2020 |
| Oceania | A1a1a+ 26625    | 241, 1059, 3037, 14408, 23403, 25563T, 26625             | North America | 0.41 | Australia | 24/03/2020 | USA       | 15/03/2020 |
| Oceania | A1a1a11         | 241, 379A, 1059, 3037, 14408, 23403, 25563T              | North America | 0.41 | Australia | 17/03/2020 | USA       | 07/03/2020 |
| Oceania | A1a1a12         | 241, 1059, 10851, 14408, 23403, 25563T                   | North America | 2.81 | Australia | 21/03/2020 | USA       | 09/03/2020 |
| Oceania | A1a1+8389 +1319 | 241, 1319, 3037, 8389, 14408, 23403, 25563T              | South America | 0.25 | Australia | 26/03/2020 | Chile     | 12/03/2020 |
| Oceania | A1a2w1          | 241, 3037, 14408, 23403, 27299, 28881, 28882, 29148      | South America | 0.17 | Australia | 27/03/2020 | Canada    | 07/03/2020 |
| Oceania | A5a             | 6312A, 11083T, 13730, 23929, 28311                       | South Asia    | 3.47 | Australia | 05/03/2020 | Taiwan    | 04/03/2020 |
| Oceania | A5a1+12685T     | 6310A, 6312A, 11083T, 12685T, 13730, 19524, 23929, 28311 | South Asia    | 0.17 | Australia | 23/03/2020 | Australia | 23/03/2020 |
| Oceania | A5a1            | 6310A, 6312A, 11083T, 13730, 19524, 23929, 28311         | South Asia    | 0.41 | Australia | 13/03/2020 | Australia | 13/03/2020 |

|                  |                   |                                                                 |                 |       |           |            |                      |            |
|------------------|-------------------|-----------------------------------------------------------------|-----------------|-------|-----------|------------|----------------------|------------|
| Oceania          | A5b+884,<br>8653T | 884, 1397, 8653T,<br>11083T, 28688,<br>29742T                   | Western<br>Asia | 0.83  | Australia | 02/03/2020 | Norway               | 26/02/2020 |
| Oceania          | A5b+9514          | 1397, 9514,<br>11083T, 28688,<br>29742T                         | Western<br>Asia | 0.33  | Australia | 30/03/2020 | United Arab Emirates | 25/02/2020 |
| South<br>America | A                 | 0                                                               | East<br>Asia    | 0.72  | Colombia  | 31/03/2020 | China                | 24/12/2019 |
| South<br>America | B2                | 8782, 9477A,<br>14805, 23280,<br>25979T, 28144,<br>28657, 28863 | Europe          | 4.32  | Chile     | 03/03/2020 | France               | 25/02/2020 |
| South<br>America | B4                | 8782, 26088,<br>28144                                           | Europe          | 0.72  | Chile     | 10/03/2020 | Australia            | 23/02/2020 |
| South<br>America | B4+19983          | 8782, 19983,<br>26088, 28144                                    | Europe          | 0.72  | Chile     | 12/03/2020 | Chile                | 12/03/2020 |
| South<br>America | B4a               | 8782, 17470,<br>126088, 28144                                   | Europe          | 4.32  | Chile     | 02/03/2020 | Chile                | 02/03/2020 |
| South<br>America | A2a1b             | 11083T, 14805,<br>17247, 26144T                                 | Europe          | 1.80  | Brazil    | 28/02/2020 | England              | 25/02/2020 |
| South<br>America | A4                | 1605delATG                                                      | Europe          | 0.72  | Chile     | 15/03/2020 | England              | 05/02/2020 |
| South<br>America | A1a3 + 5230T      | 241, 3037, 5230T,<br>14408, 20268,<br>23403                     | Europe          | 0.72  | Chile     | 16/03/2020 | Chile                | 16/03/2020 |
| South<br>America | A1a3c             | 241, 3037, 14408,<br>20268, 23403,<br>29734C                    | Europe          | 1.44  | Chile     | 09/03/2020 | Spain/USA            | 05/03/2020 |
| South<br>America | A1a3              | 241, 3037, 14408,<br>20268, 23403                               | Europe          | 14.03 | Chile     | 09/03/2020 | Switzerland          | 27/02/2020 |
| South<br>America | A1a               | 241, 3037, 14408,<br>23403                                      | Europe          | 4.68  | Brazil    | 04/03/2020 | Italy                | 20/02/2020 |
| South<br>America | A1a5              | 241, 3037, 14408,<br>15324, 23403                               | Europe          | 0.72  | Chile     | 17/03/2020 | France/Thailand      | 03/03/2020 |

|               |           |                                                     |        |       |              |            |                         |            |
|---------------|-----------|-----------------------------------------------------|--------|-------|--------------|------------|-------------------------|------------|
| South America | A1a6      | 241, 3037, 14408, 23403, 25350                      | Europe | 2.52  | Chile        | 14/03/2020 | Australia               | 22/02/2020 |
| South America | A1a15     | 241, 3037, 14408, 23403, 29144                      | Europe | 0.72  | Chile        | 11/03/2020 | Portugal                | 01/03/2020 |
| South America | A1a2      | 241, 3037, 14408, 23403, 28881, 28882               | Europe | 8.99  | Brazil/Chile | 05/03/2020 | England                 | 23/02/2020 |
| South America | A1a2w     | 241, 3037, 14408, 23403, 28881, 28882, 29148        | Europe | 8.27  | Brazil       | 13/03/2020 | Switzerland/Netherlands | 28/02/2020 |
| South America | A1a1      | 241, 3037, 14408, 23403, 25563T                     | Europe | 0.72  | Brazil       | 13/03/2020 | France                  | 26/02/2020 |
| South America | A1a2b     | 241, 3037, 14408, 23403, 27046, 28881, 28882        | Europe | 1.08  | Brazil       | 02/03/2020 | Netherlands             | 24/02/2020 |
| South America | A1a2d     | 241, 313, 3037, 14408, 23403, 28881, 28882          | Europe | 2.52  | Brasil       | 04/03/2020 | Switzerland             | 27/02/2020 |
| South America | A1a2c     | 241, 3037, 14408, 19839, 23403, 28881, 28882        | Europe | 0.72  | Colombia     | 06/03/2020 | Switzerland             | 26/02/2020 |
| South America | A1a2h     | 241, 3037, 14408, 19170, 19509, 23403, 28881, 28882 | Europe | 0.72  | Chile        | 10/03/2020 | England                 | 06/03/2020 |
| South America | A1a2+7728 | 241, 3037, 7728, 14408, 23403, 28881, 28882         | Europe | 0.72  | Colombia     | 04/04/2020 | Luxembourg              | 22/03/2020 |
| South America | A1a2ak    | 241, 3037, 10265, 14408, 23403, 28881, 28882        | Europe | 4.32  | Brazil       | 04/03/2020 | Germany                 | 25/02/2020 |
| South America | A1a1a     | 241, 1059, 3037, 14408, 23403, 25563T               | Europe | 11.51 | Brazil       | 10/03/2020 | France                  | 21/02/2020 |

|               |              |                                                                  |               |       |           |            |                  |            |
|---------------|--------------|------------------------------------------------------------------|---------------|-------|-----------|------------|------------------|------------|
| South America | A1a2a1       | 241, 3037, 4002, 10097, 13536, 14408, 23403, 23731, 28881, 28882 | Europe        | 3.24  | Chile     | 01/04/2020 | Denmark          | 02/03/2020 |
| South America | B1a1a        | 8782, 17747, 17858, 18060, 24694T, 28144                         | North America | 0.72  | Uruguay   | 17/03/2020 | Canada/Australia | 05/03/2020 |
| South America | A1a1b        | 241, 3037, 14408, 18877, 23403, 25563T                           | North America | 9.71  | Brazil    | 09/03/2020 | USA/Canada       | 29/02/2020 |
| South America | A1a1a3+19018 | 241, 1059, 3037, 11916, 14408, 19018, 23403, 25563T              | North America | 0.72  | Colombia  | 04/04/2020 | USA              | 14/03/2020 |
| South America | A1a1a3a      | 241, 1059, 3037, 11916, 14408, 18998, 23403, 25563T, 29540       | North America | 1.08  | Argentina | 28/03/2020 | USA              | 05/03/2020 |
| South America | A1a1+8389    | 241, 3037, 8389, 14408, 23403, 25563T                            | North America | 6.83  | Chile     | 12/03/2020 | USA              | 02/03/2020 |
| South Asia    | A            | 0                                                                | East Asia     | 2.31  | India     | 27/01/2020 | China            | 24/12/2019 |
| South Asia    | A5           | 11083T                                                           | East Asia     | 39.19 | India     | 16/03/2020 | China            | 18/01/2020 |
| South Asia    | A5b          | 1397, 11083T, 28688, 29742T                                      | East Asia     | 1.15  | India     | 10/03/2020 | China            | 18/01/2020 |
| South Asia    | A2a1a1       | 2480, 2558, 11083T, 14805, 26144T                                | Europe        | 0.58  | India     | 15/03/2020 | England          | 09/02/2020 |
| South Asia    | A1a          | 241, 3037, 14408, 23403                                          | Europe        | 20.17 | India     | 11/03/2020 | Italy            | 20/02/2020 |

|              |                     |                                                             |               |       |                      |            |              |            |
|--------------|---------------------|-------------------------------------------------------------|---------------|-------|----------------------|------------|--------------|------------|
| South Asia   | A1a9a               | 241, 3037, 4255T, 14408, 23403, 26530                       | Europe        | 0.58  | India                | 17/03/2020 | USA          | 05/03/2020 |
| South Asia   | A1a2                | 241, 3037, 14408, 23403, 28881, 28882                       | Europe        | 3.75  | Sri Lanka            | 10/03/2020 | England      | 23/02/2020 |
| South Asia   | A1a2d               | 241, 313, 3037, 14408, 23403, 28881, 28882                  | Europe        | 1.73  | India                | 02/03/2020 | Switzerland  | 27/02/2020 |
| South Asia   | A1a1a               | 241, 1059, 3037, 14408, 23403, 25563T                       | Europe        | 0.58  | India                | 13/03/2020 | France       | 21/02/2020 |
| South Asia   | A1a1a+ 28371T       | 241, 1059, 3037, 14408, , 23403, 25563T, 28371T             | Europe        | 0.58  | India                | 13/04/2020 | Wales/Russia | 27/03/2020 |
| South Asia   | B7+22468T           | 8782, 22468T, 28144, 28878, 29742                           | North America | 2.02  | India                | 26/03/2020 | USA          | 06/03/2020 |
| South Asia   | A5b+884, 8653T      | 884, 1397, 8653T, 11083T, 28688, 29742T                     | Western Asia  | 5.19  | India                | 10/03/2020 | Norway       | 26/02/2020 |
| South Asia   | A1a1b1              | 241, 3037, 14408, 18877, 23403, 25563T, 26735               | Western Asia  | 8.36  | India                | 20/04/2020 | Saudi Arabia | 10/03/2020 |
| South Asia   | A1a1b1+22444, 28854 | 241, 3037, 14408, 18877, 22444, 23403, 25563T, 26735, 28854 | Western Asia  | 10.37 | India                | 15/03/2020 | India        | 15/03/2020 |
| Western Asia | B7                  | 8782, 28144, 28878, 29742                                   | China         | 0.67  | Saudi Arabia         | 29/03/2020 | China        | 23/01/2020 |
| Western Asia | A2a                 | 11083T, , 26144T                                            | East Asia     | 0.89  | Georgia              | 27/02/2020 | China        | 23/01/2020 |
| Western Asia | A5b                 | 1397, 11083T, 28688, 29742T                                 | East Asia     | 11.97 | United Arab Emirates | 25/02/2020 | China        | 18/01/2020 |



|              |          |                                                  |        |       |                      |            |                 |            |
|--------------|----------|--------------------------------------------------|--------|-------|----------------------|------------|-----------------|------------|
| Western Asia | A2a1c    | 11083T, 14805, 26144T, 28842T                    | Europe | 1.33  | Jordan               | 16/03/2020 | Denmark         | 09/03/2020 |
| Western Asia | A2a1     | 11083T, 14805, 26144T,                           | Europe | 2.00  | Qatar                | 23/03/2020 | Korea           | 18/02/2020 |
| Western Asia | A2a1b    | 11083T, 14805, 17247, 26144T                     | Europe | 1.33  | Israel               | 17/03/2020 | England         | 25/02/2020 |
| Western Asia | A2a1b3   | 7479, 11083T, 14805, 17247, 25572, 26144T, 28887 | Europe | 0.44  | Jordan               | 30/03/2020 | Scotland        | 17/03/2020 |
| Western Asia | A1a3     | 241, 3037, 14408, 20268, 23403                   | Europe | 0.44  | Georgia              | 16/03/2020 | Switzerland     | 27/02/2020 |
| Western Asia | A1a      | 241, 3037, 14408, 23403                          | Europe | 3.33  | Georgia              | 10/03/2020 | Italy           | 20/02/2020 |
| Western Asia | A1a5     | 241, 3037, 14408, 15324, 23403                   | Europe | 0.67  | Kuwait               | 15/03/2020 | France/Thailand | 03/03/2020 |
| Western Asia | A1a6     | 241, 3037, 14408, 23403, 25350                   | Europe | 0.67  | Israel               | 02/04/2020 | Australia       | 22/02/2020 |
| Western Asia | A1a+1059 | 241, 1059, 3037, 14408, 23403                    | Europe | 0.44  | Israel               | 23/03/2020 | Netherlands     | 09/03/2020 |
| Western Asia | A1a2     | 241, 3037, 14408, 23403, 28881, 28882            | Europe | 6.21  | Israel               | 01/03/2020 | England         | 23/02/2020 |
| Western Asia | A1a2d    | 241, 313, 3037, 14408, 23403, 28881, 28882       | Europe | 3.99  | Israel               | 01/03/2020 | Switzerland     | 27/02/2020 |
| Western Asia | A1a1c    | 241, 2416, 3037, 14408, 23403, 25563T            | Europe | 3.99  | Israel               | 17/03/2020 | France          | 29/02/2020 |
| Western Asia | A1a1a    | 241, 1059, 3037, 14408, 23403, 25563T            | Europe | 10.86 | United Arab Emirates | 10/03/2020 | France          | 21/02/2020 |
| Western Asia | A1a1a5a  | 241, 1059, 3037, 13006, 14408,                   | Europe | 0.44  | Israel               | 29/03/2020 | Senegal         | 28/02/2020 |

|              |             |                                                                     |               |       |              |            |                |            |
|--------------|-------------|---------------------------------------------------------------------|---------------|-------|--------------|------------|----------------|------------|
|              |             | 23403, 25563T,<br>25688                                             |               |       |              |            |                |            |
| Western Asia | A1a1        | 241, 3037, 14408,<br>23403, 25563T                                  | Europe        | 3.77  | Lebanon      | 13/03/2020 | France         | 26/02/2020 |
| Western Asia | A1a1a14     | 241, 1059,<br>11083T, 14408,<br>23403, 25563T                       | Europe        | 0.44  | Trukey       | 26/03/2020 | Czech Republic | 08/03/2020 |
| Western Asia | B7+22468T   | 8782, 22468T,<br>28144, 28878,<br>29742                             | North America | 4.66  | Saudi Arabia | 23/03/2020 | USA            | 06/03/2020 |
| Western Asia | A1a1b       | 241, 3037, 14408,<br>18877, 23403,<br>25563T                        | North America | 27.27 | Lebanon      | 04/03/2020 | USA/Canada     | 29/02/2020 |
| Western Asia | A1a1a+16616 | 241, 1059, 3037,<br>14408, 16616,<br>23403, 25563T                  | North America | 0.44  | Turkey       | 26/03/2020 | USA            | 19/03/2020 |
| Western Asia | A1a1a3a     | 241, 1059, 3037,<br>11916, 14408,<br>18998, 23403,<br>25563T, 29540 | North America | 6.43  | Israel       | 26/03/2020 | USA            | 05/03/2020 |
| Western Asia | A1a1a+27549 | 241, 1059, 3037,<br>14408, 23403,<br>25563T, 27549                  | North America | 0.67  | Israel       | 26/03/2020 | USA            | 09/03/2020 |
| Western Asia | A1a1a8      | 241, 1059, 3037,<br>14408, 20755C,<br>23403, 25563T                 | North America | 3.10  | Israel       | 17/03/2020 | Australia      | 09/03/2020 |
| Western Asia | A1a1a22     | 241, 1059, 1917,<br>3037, 14408,<br>23403, 25563T                   | North America | 0.44  | Isreal       | 20/04/2020 | USA            | 14/03/2020 |

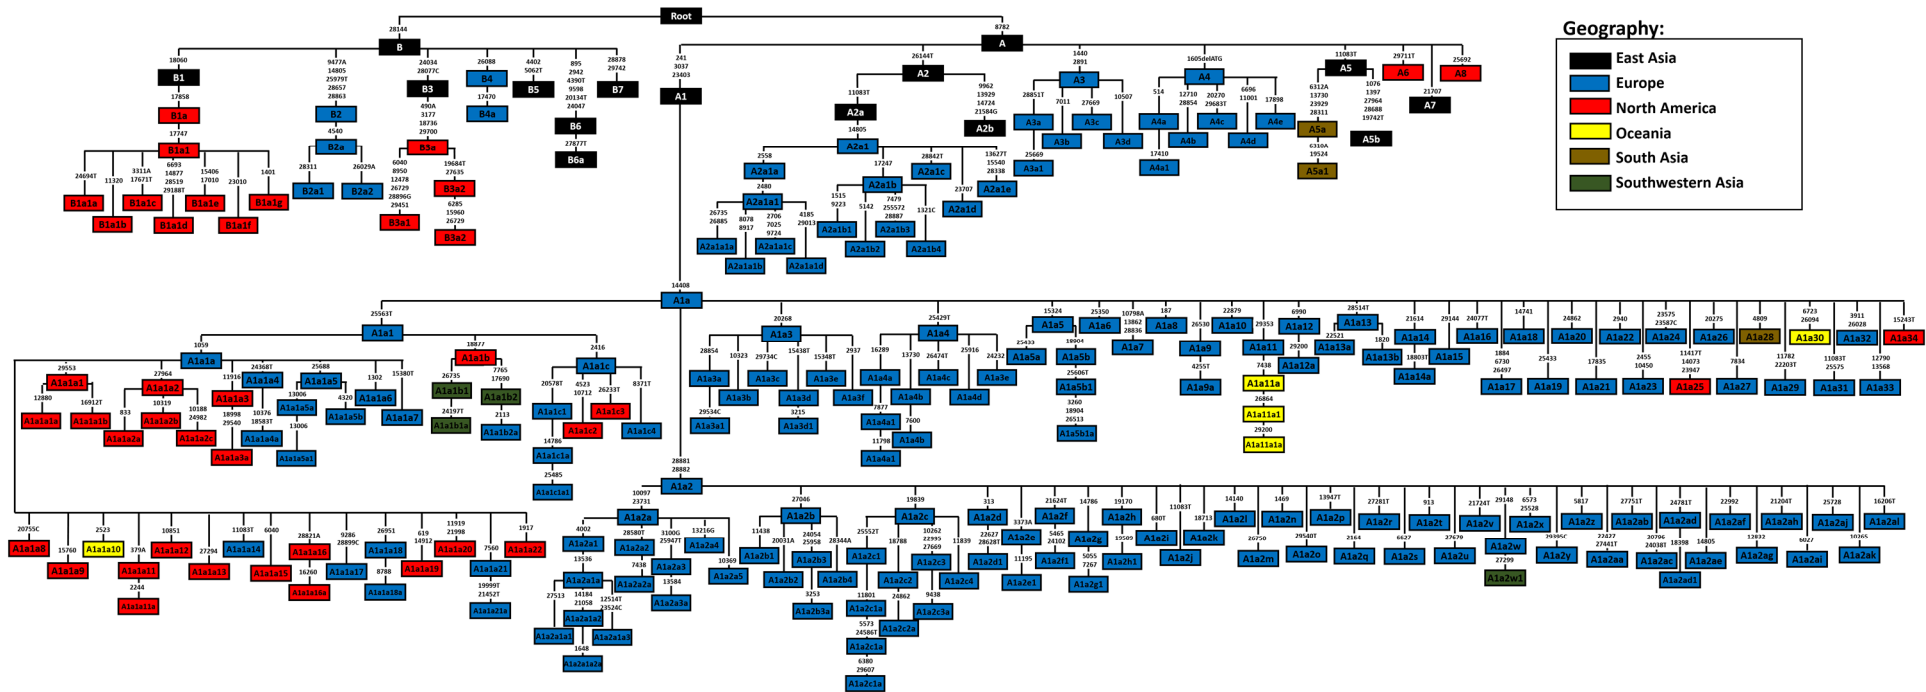

Figure S1. Schematic representation of the main branches in SARS-CoV-2 genomic diversity worldwide. Mutations are labelled considering the positions in the first SARS-CoV-2 genome. Position is followed by A, C, T or G only when the mutation is a transversion. Each clade is colored according to the most probable place of origin of each clade. The nomenclature was developed for the purpose of this study following principles (using intercalating numbers and letters) developed for human mitochondrial DNA. One deletion (1605delATG) was important to define an epidemiological relevant clade and it was used together with the substitutions. Founders are evident at each point where there is a color change on the tree, moving away from the root.

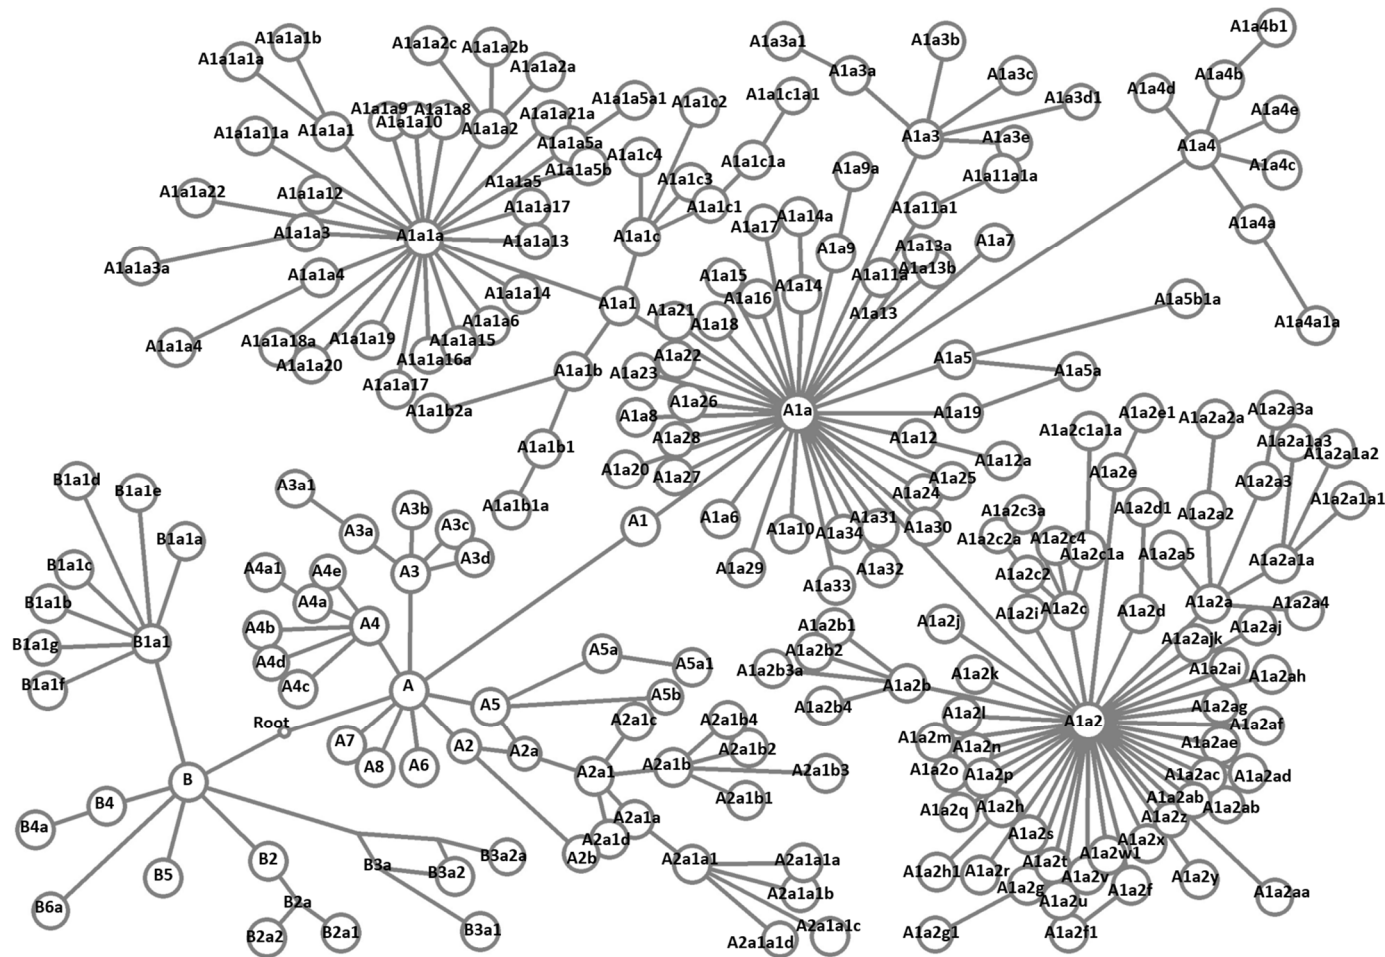

**Figure S2. Reduced-median network of SARS-CoV-2 variation worldwide using only haplotypes that were detected at least ten times in the global database. This network provides the link between Figure 1 and the nomenclature displayed in Figure S1.**

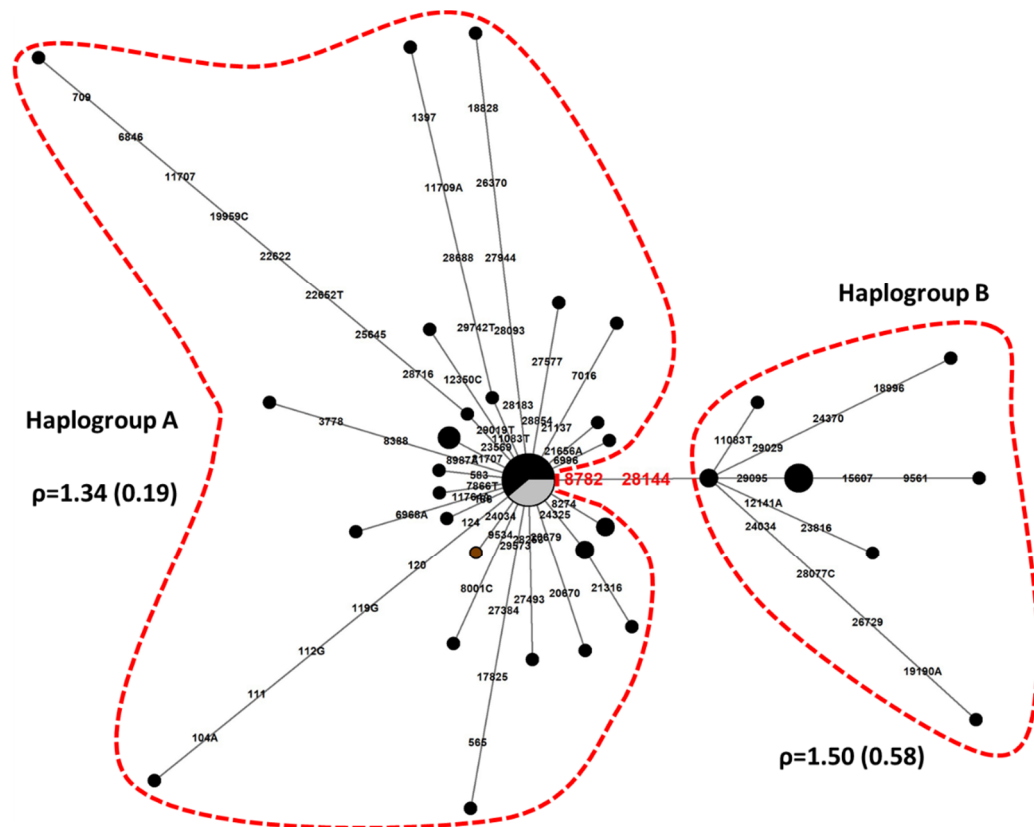

**Figure S3. Reduced-median network displaying the accumulated genomic diversity of the virus in Asia (from 24<sup>th</sup> December 2019 to 18<sup>th</sup> January 2020) up until the appearance of the first sequenced case outside the continent. A diversity measure,  $p$ , was estimated for each major haplogroup A and B. Values between brackets indicate standard errors of the estimate. Samples in black are from China, samples in grey from Mainland Southeast Asia and samples in brown from South Asia.**

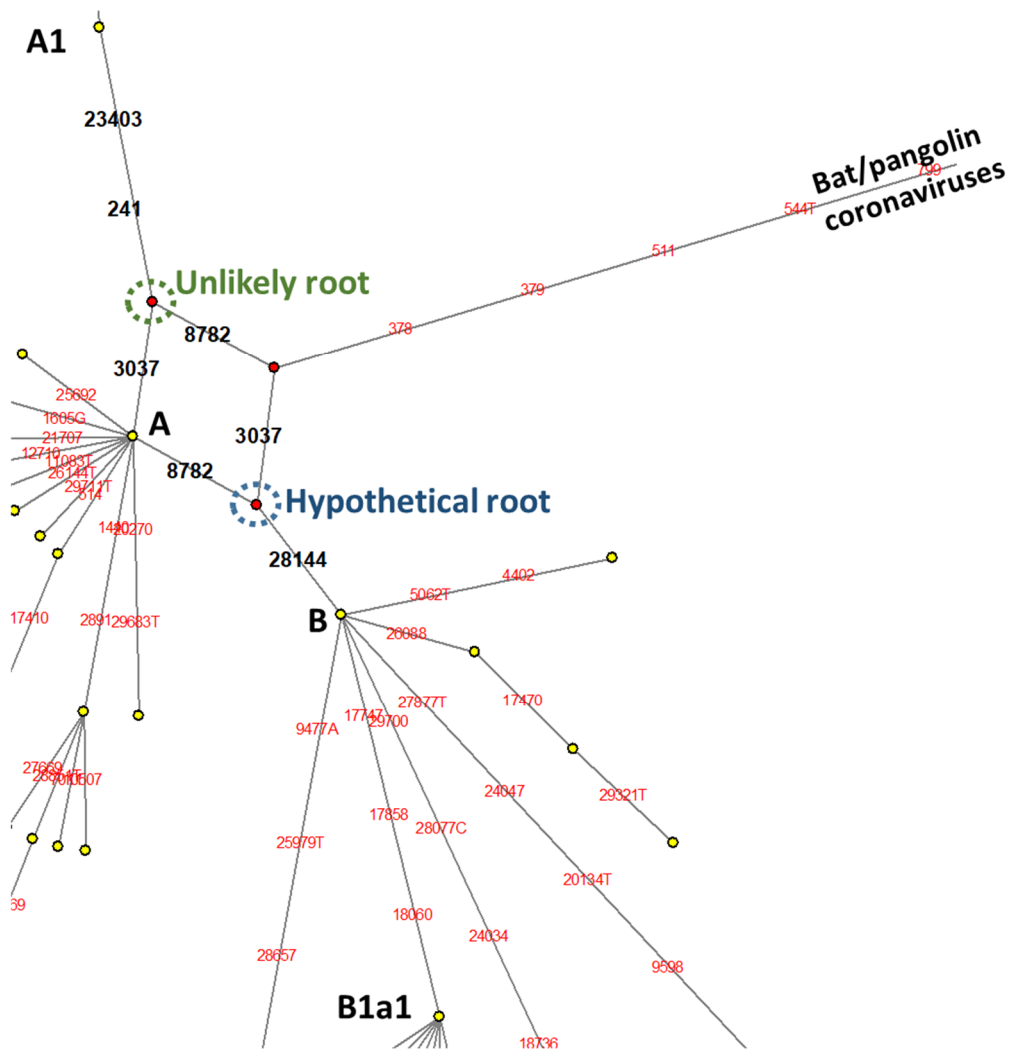

**Figure S4.** Portion of a reduced-median network showing the reticulation caused in the root of the tree with the three outgroups. Position 3037 is a fast site and likely to be involved in multiple occurrences, generating an “unlikely root”. Haplogroups A, B, A1 and B1a1 are labelled according to Figure S1.

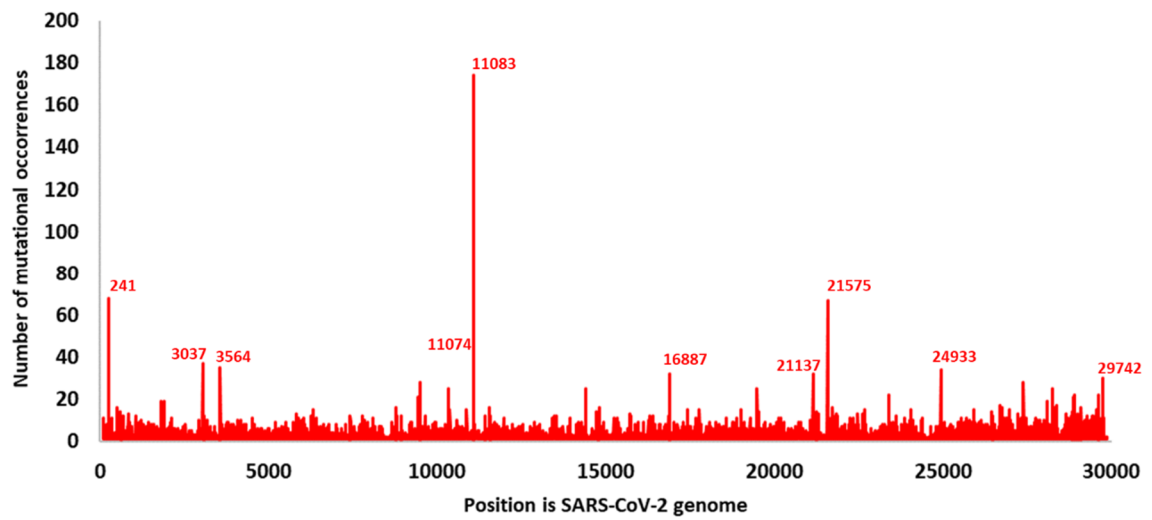

**Figure S5. Mutational spectrum across the complete genome of SARS-CoV-2 based on 20247 detected mutations in the phylogenetic reconstruction. Positions that underwent more than 30 mutations are indicated.**

**A.**

**Geography:**

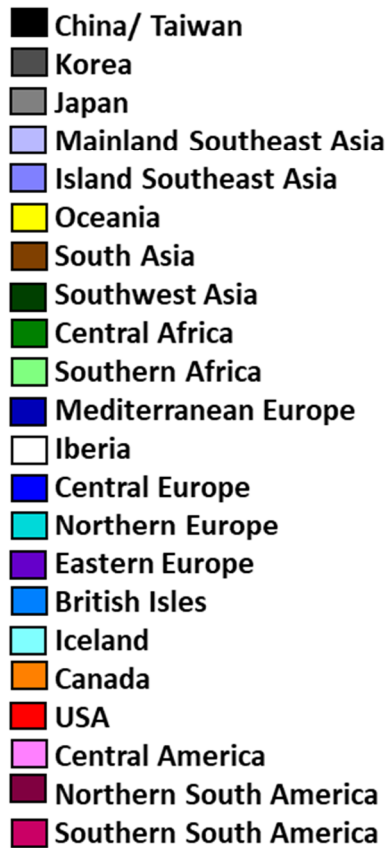

**B.**

**Collection  
date:**

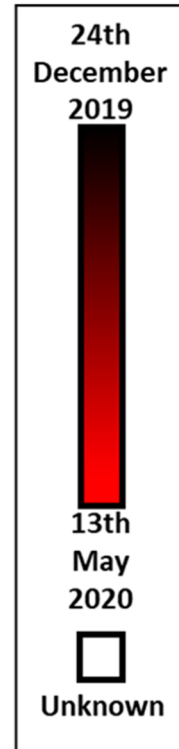

Figure S6. Color code to be employed throughout networks displayed in Figures S5 to S57, for: (A) geography and (B) time of collection.



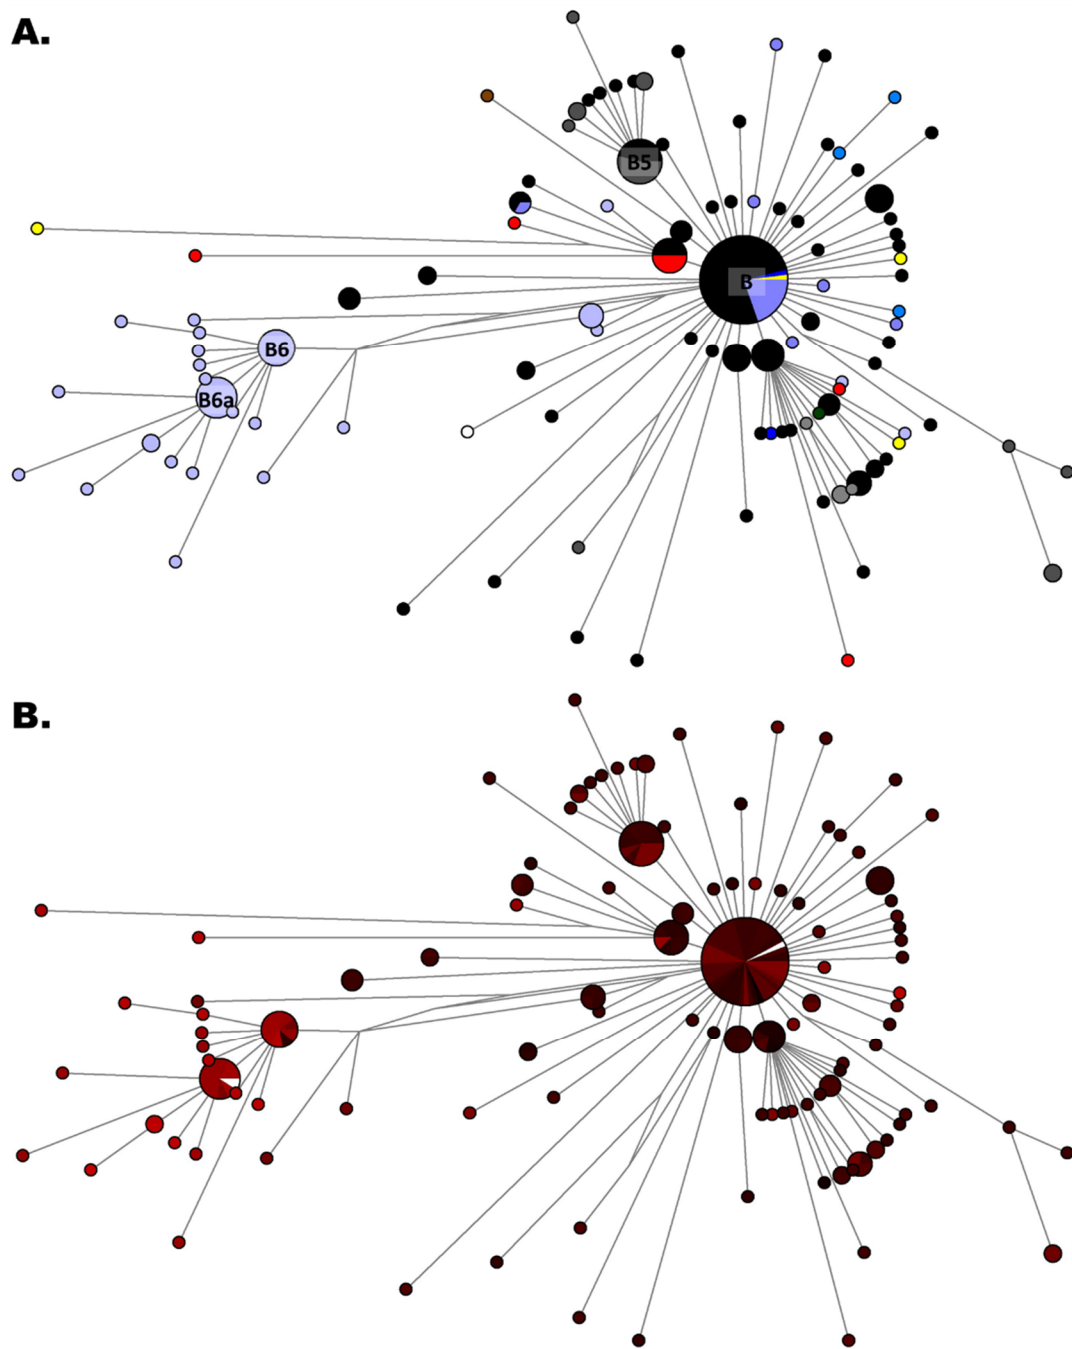

Figure S7. Reduced-median network of paragroup B (including B and B6). Samples are colored according to geography (A) and time of collection (B) following the legend in Figure S4.

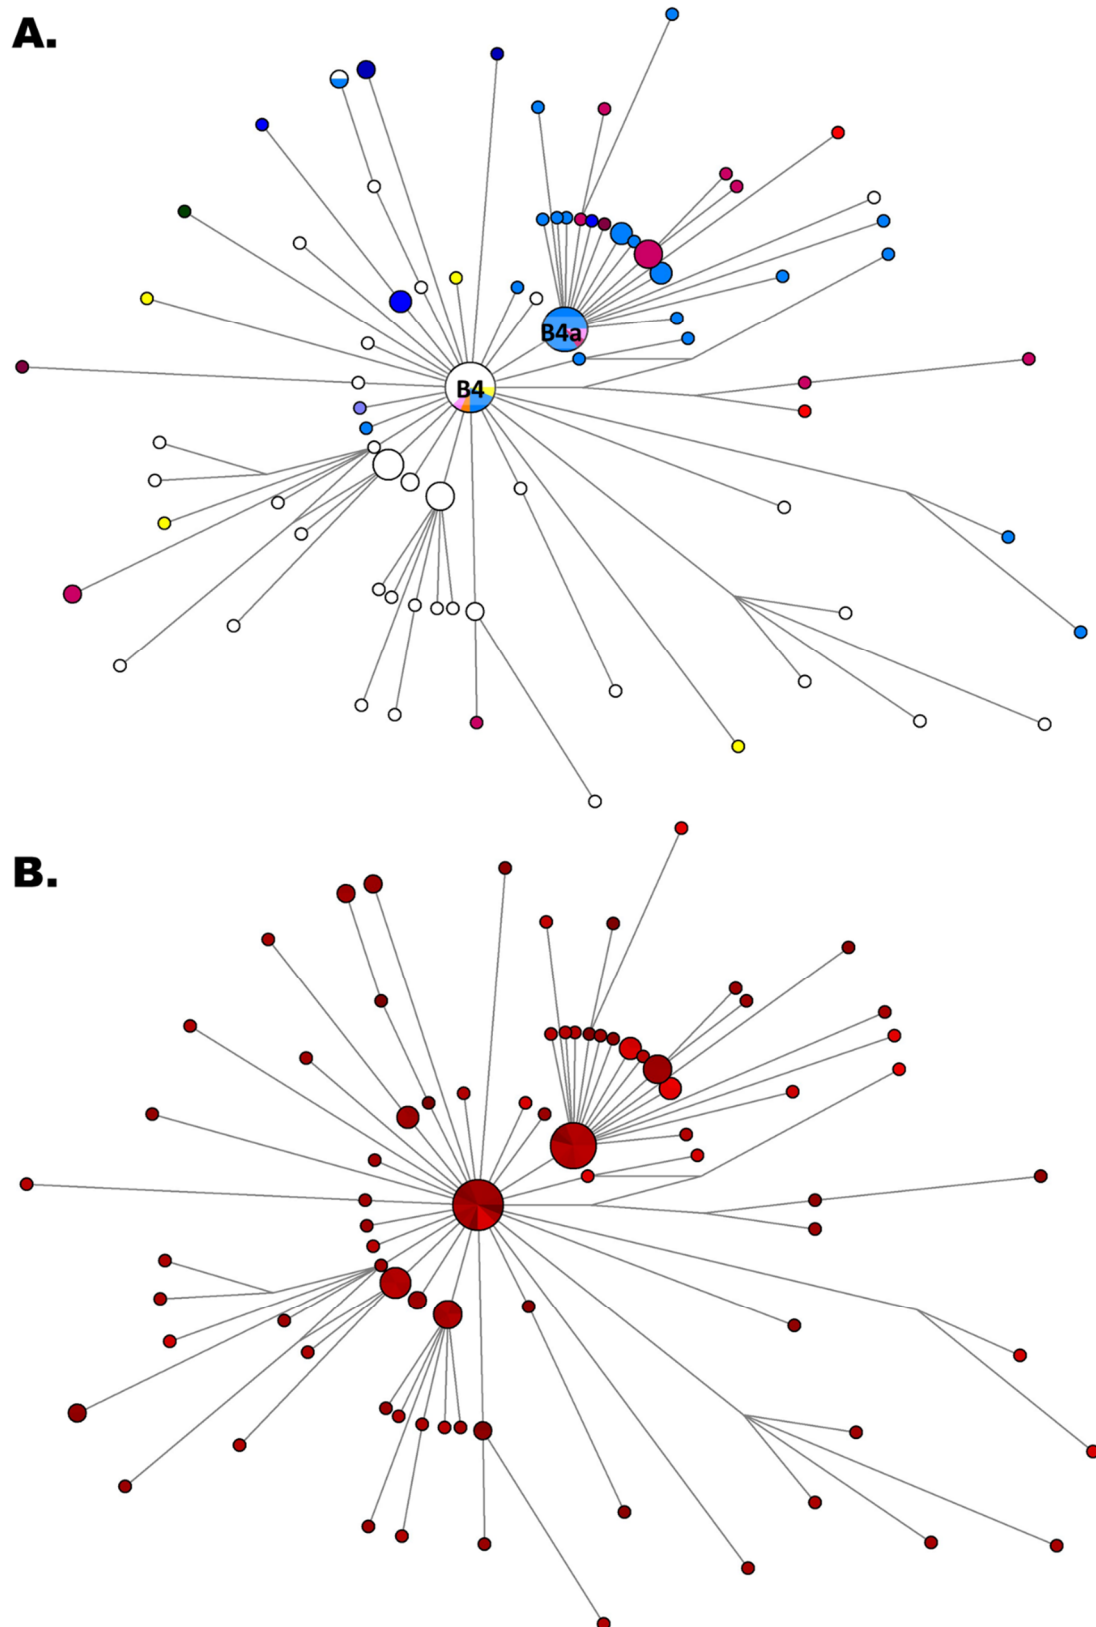

Figure S8. Reduced median network of clade B4. Samples are colored according to geography (A) and time of collection (B) following the legend in Figure S4.

**A.**

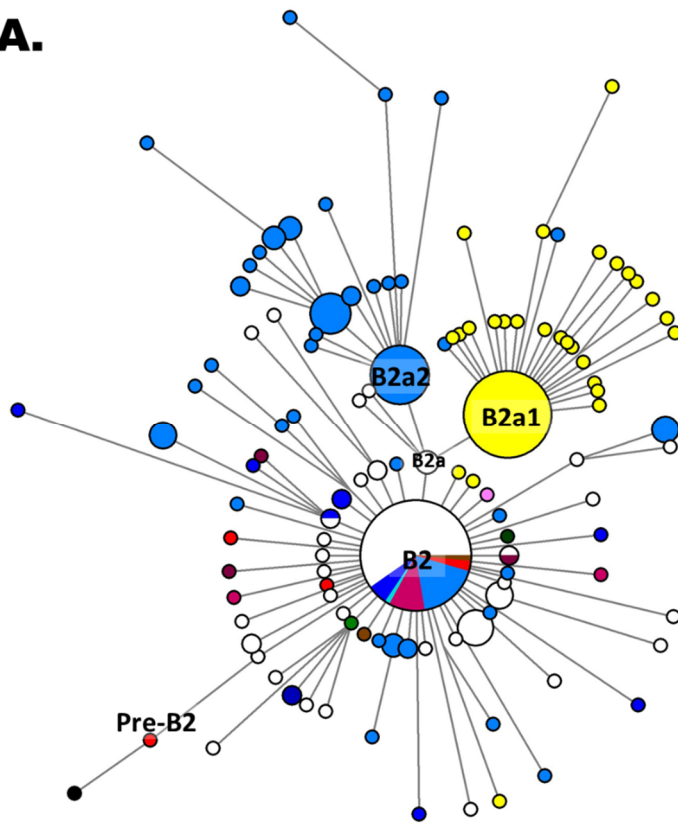

**B.**

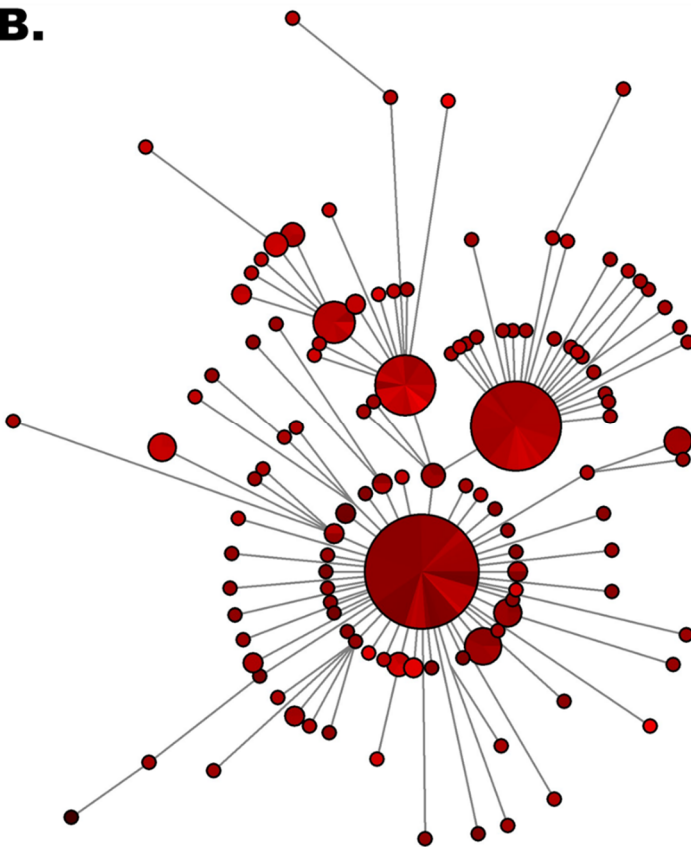

Figure S9. Reduced-median network of clade B2. Samples are colored according to geography (A) and time of collection (B) following the legend in Figure S4.

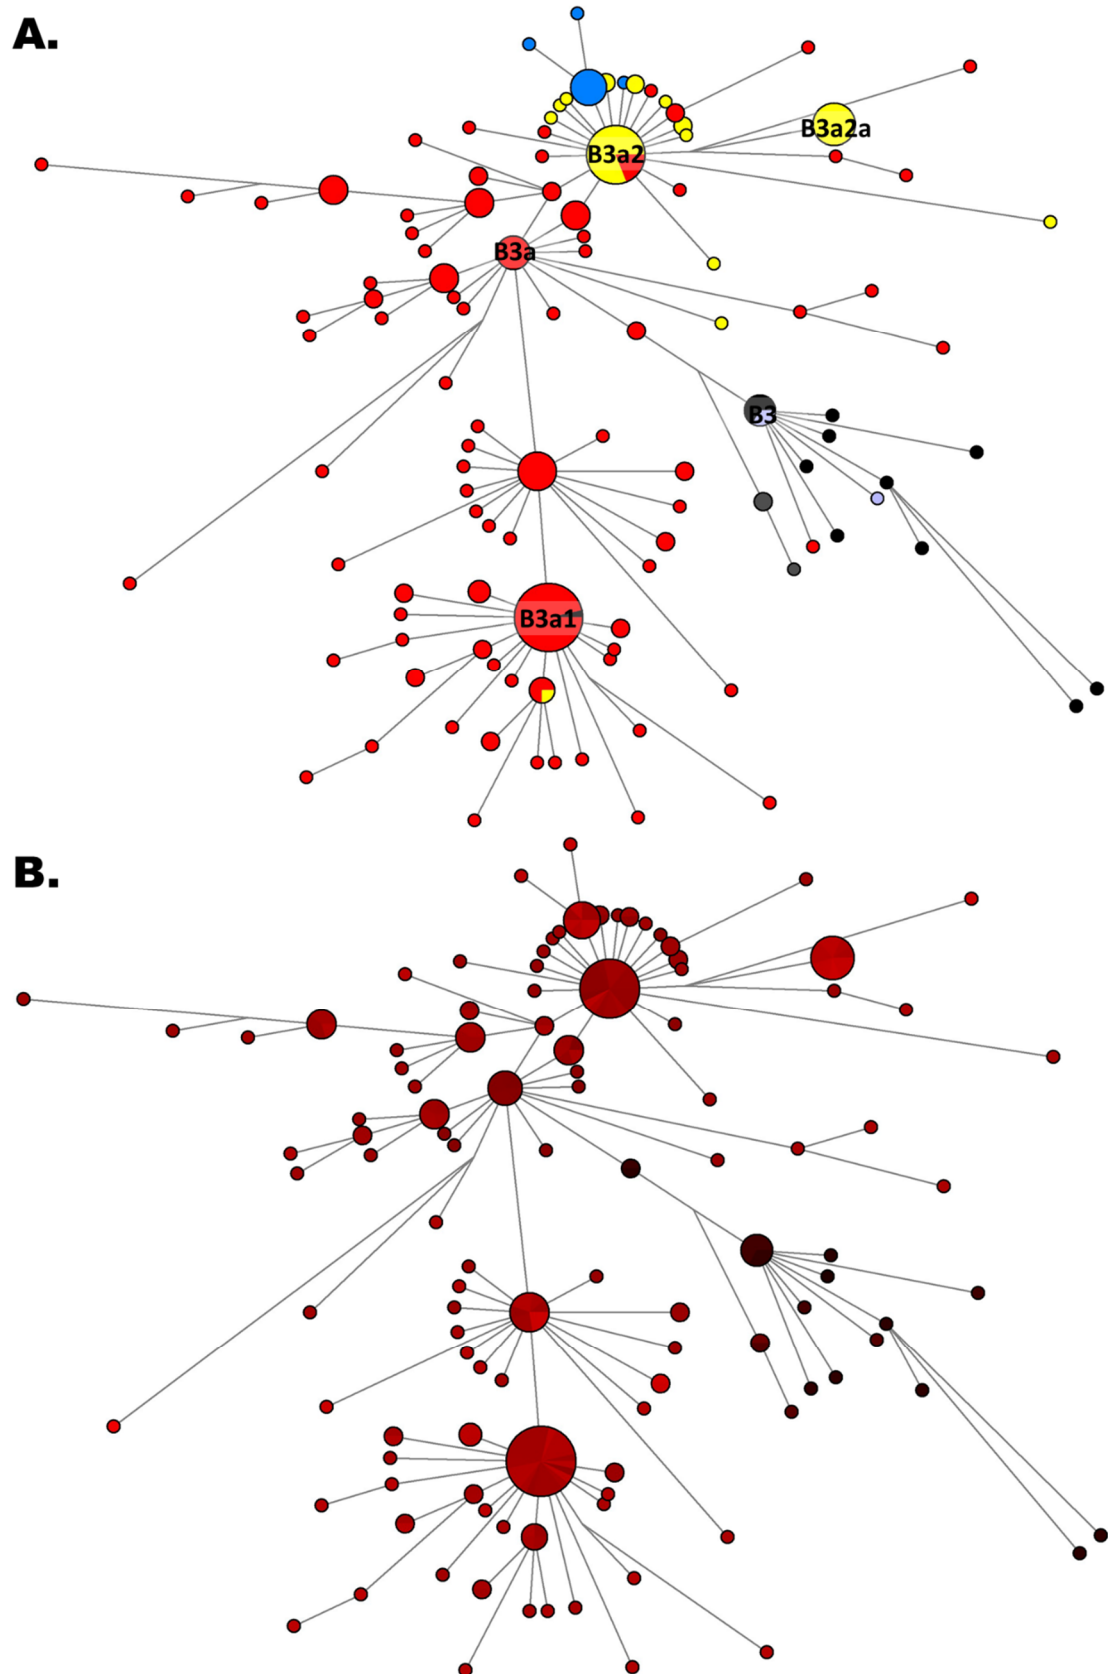

Figure S10. Reduced median network of clade B3. Samples are colored according to geography (A) and time of collection (B) following the legend in Figure S4.

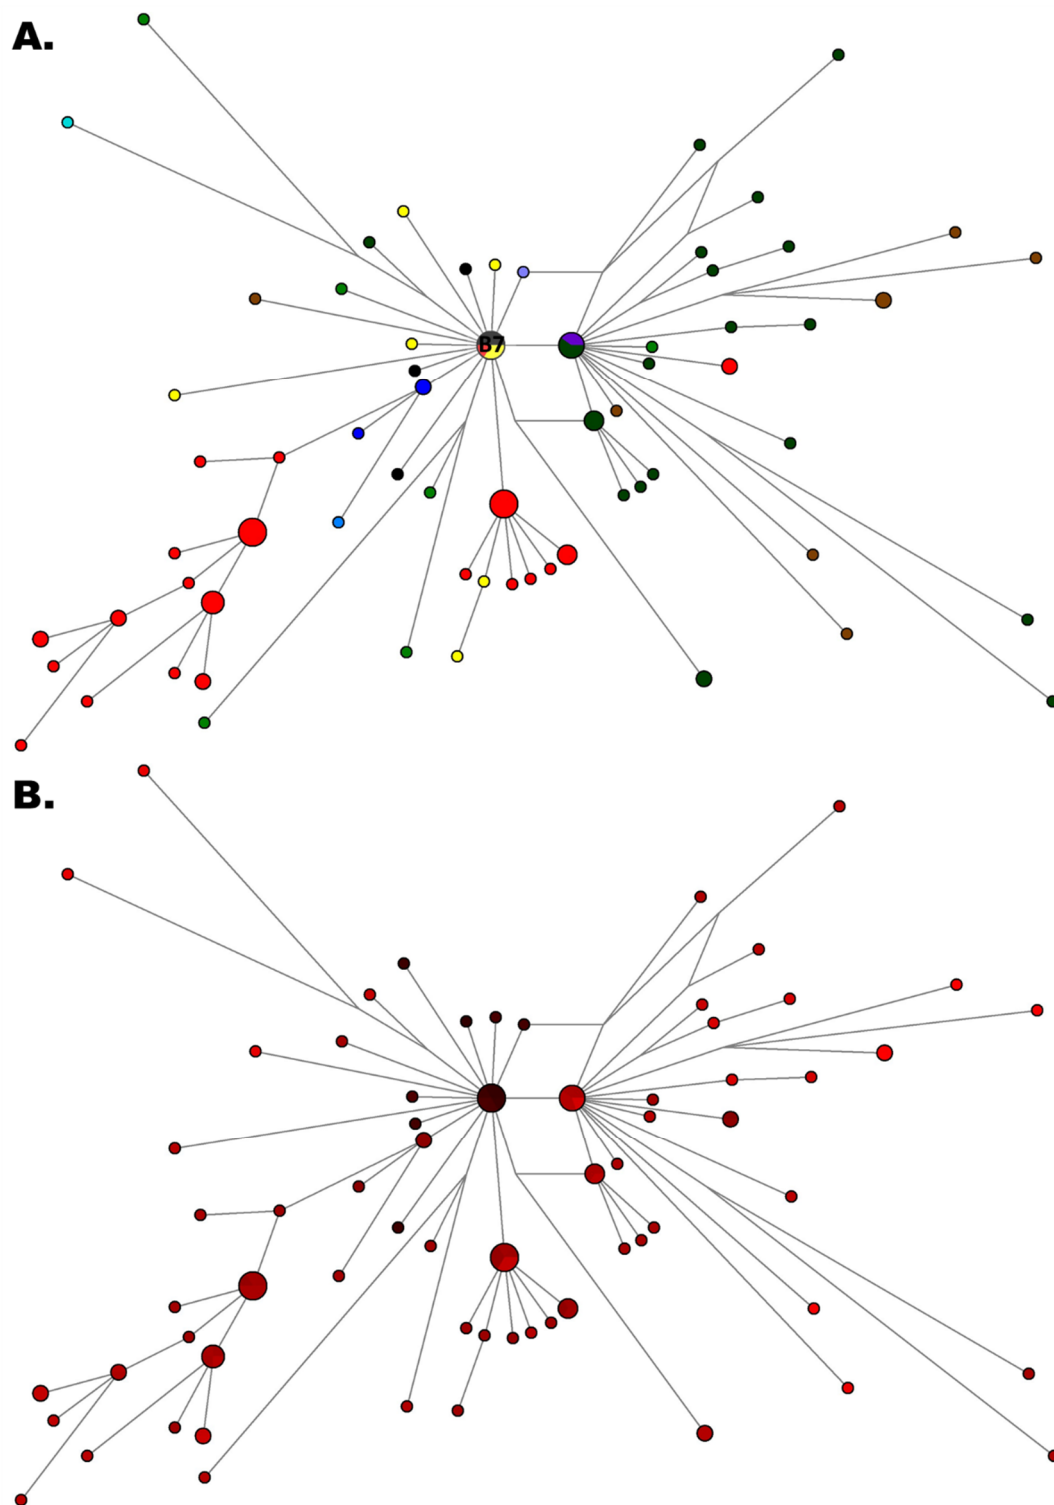

**Figure S11. Reduced median network of clade B7. Samples are colored according to geography (A) and time of collection (B) following the legend in Figure S4.**

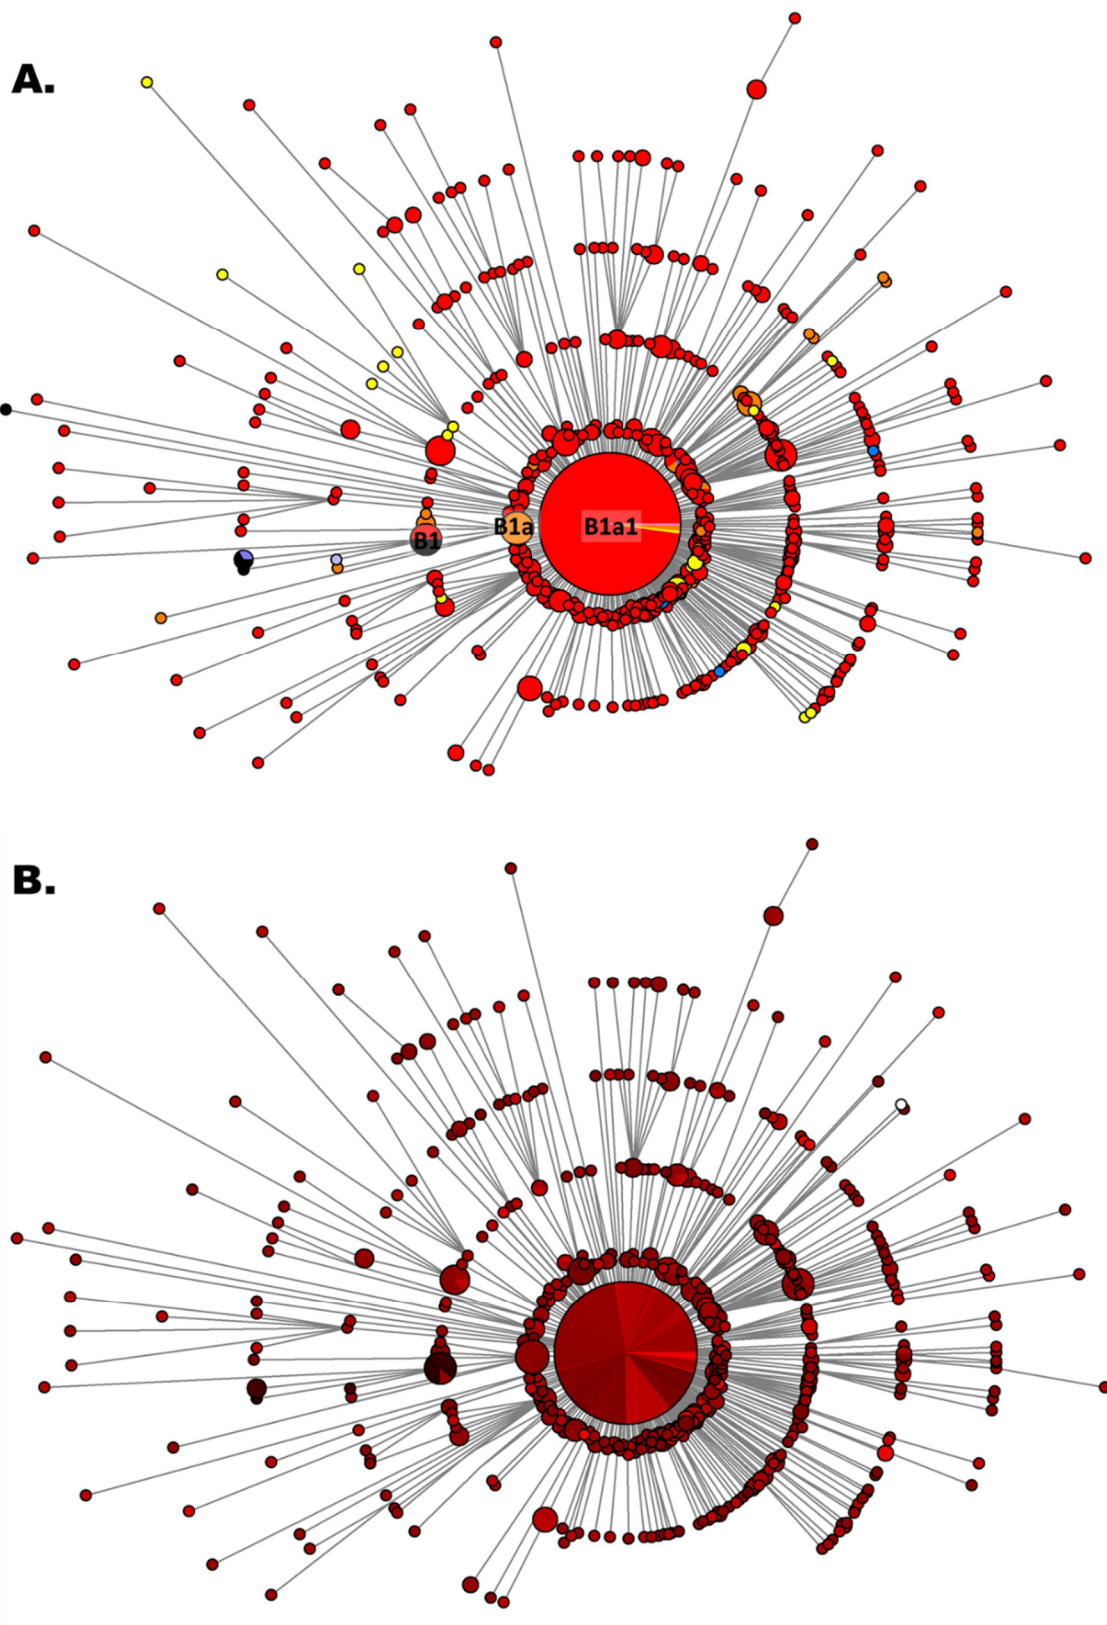

Figure S12. Reduced median network of clade B1 (containing B1a and B1a1). Some diversity of B1a1 are shown in Figure S11 and S12. Samples are colored according to geography (A) and time of collection (B) following the legend in Figure S4.



**A.**

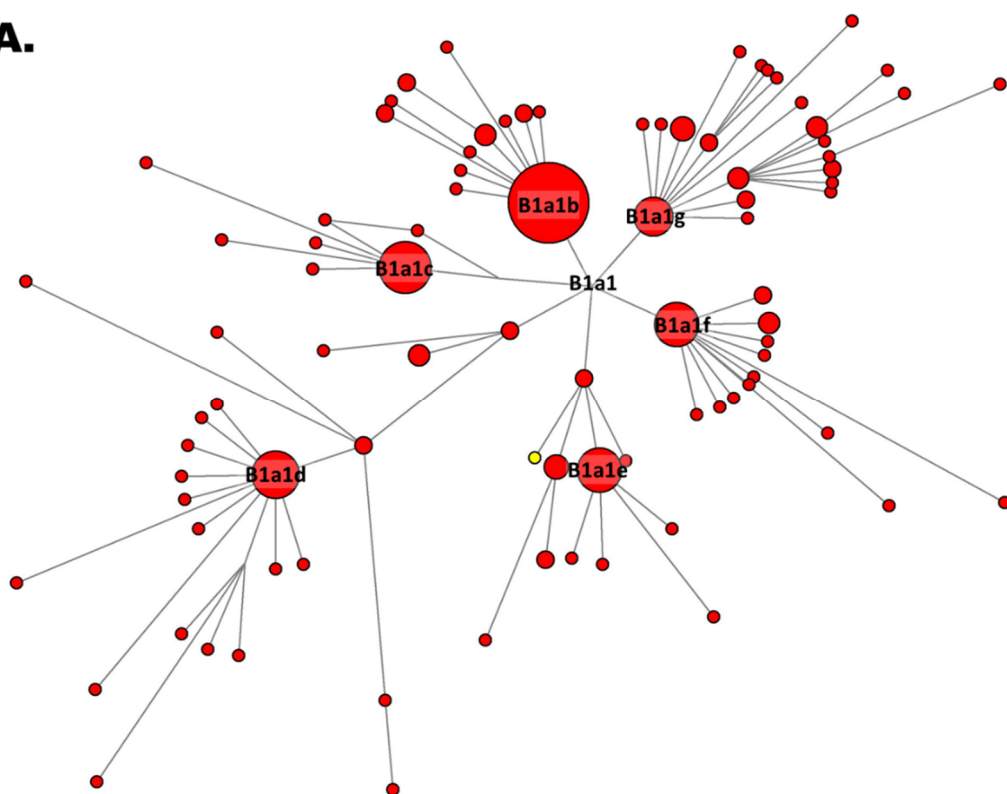

**B.**

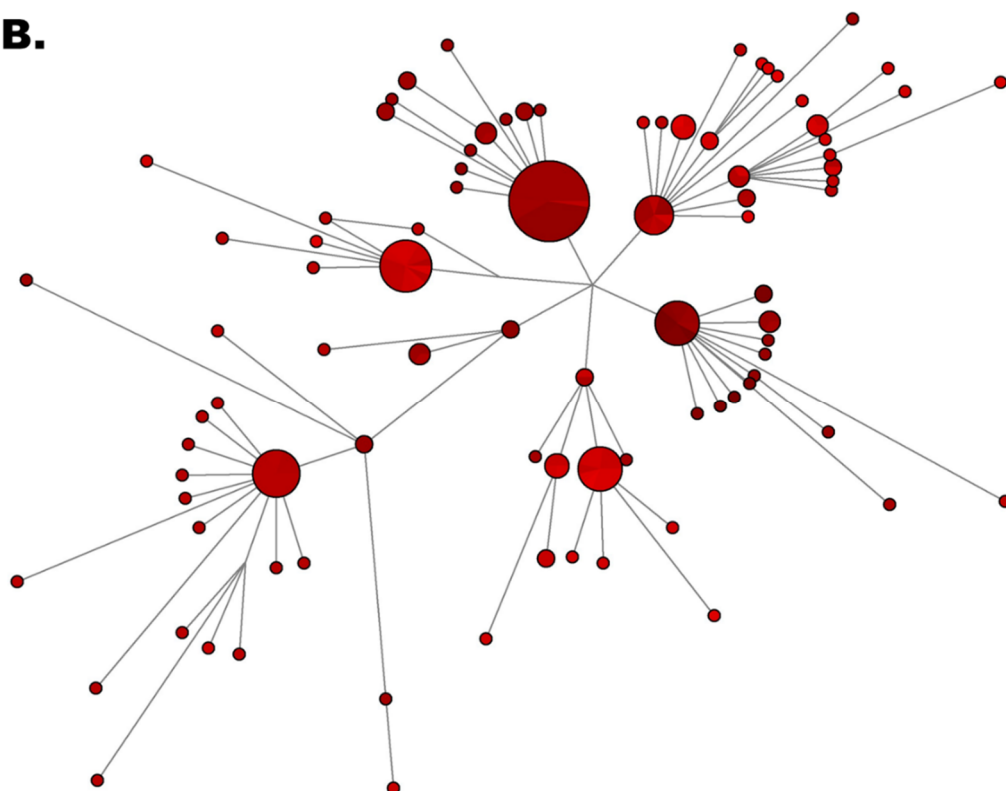

Figure S13. Reduced median network of subclades within B1a1. Samples are colored according to geography (A) and time of collection (B) following the legend in Figure S4.

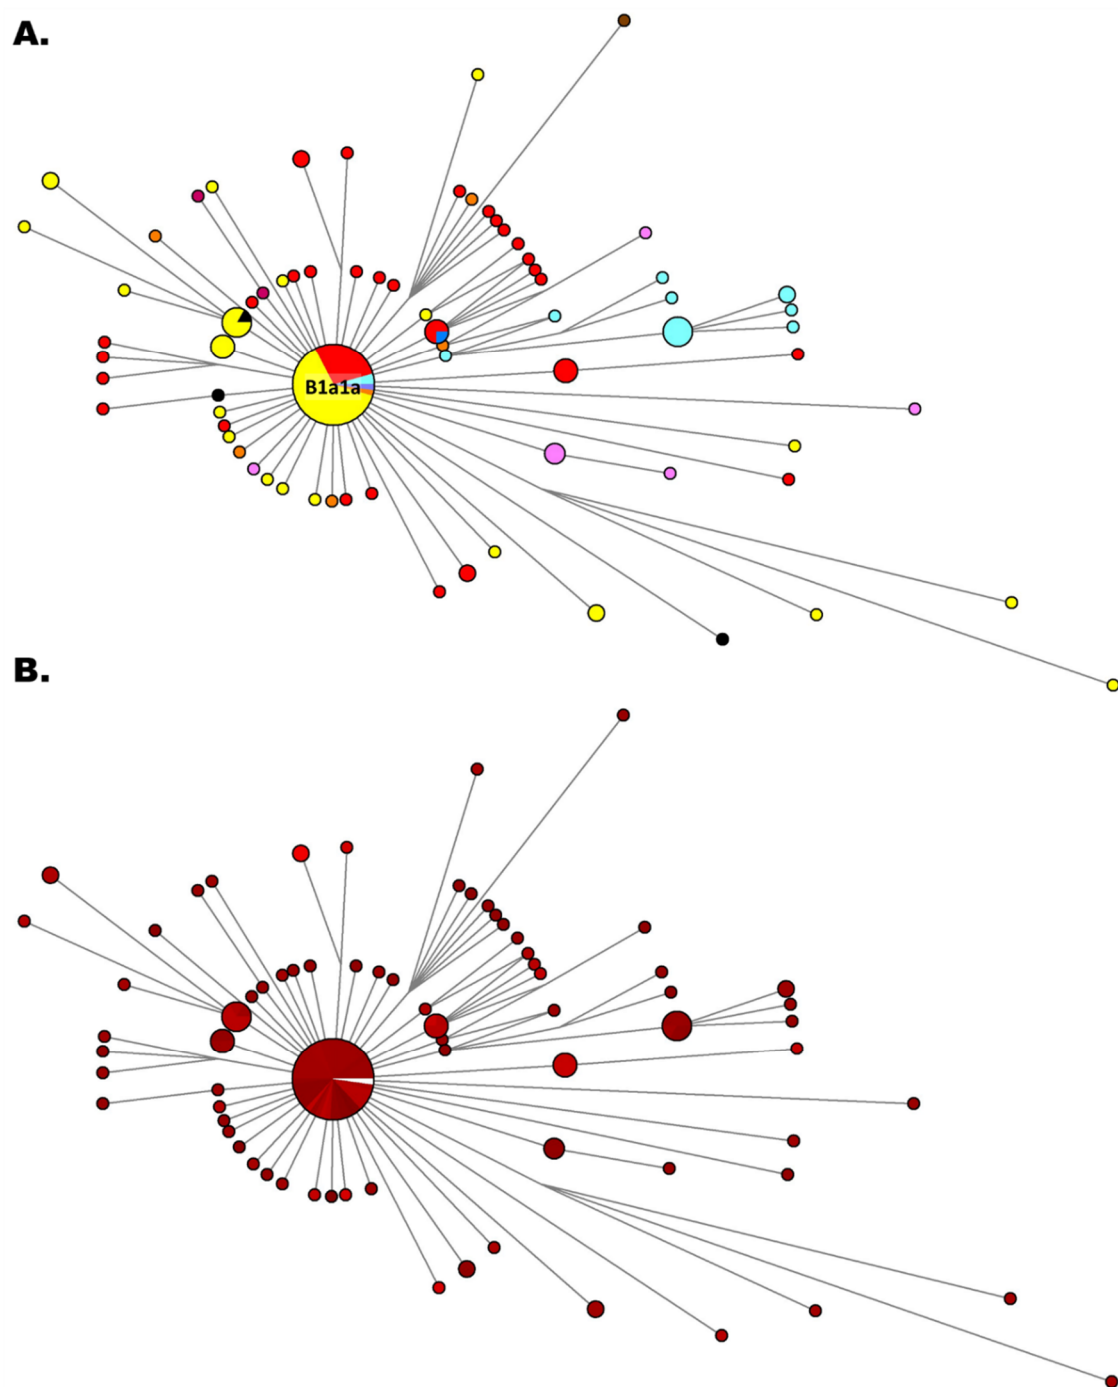

Figure S14. Reduced median network of clade B1a1a. Samples are colored according to geography (A) and time of collection (B) following the legend in Figure S4.



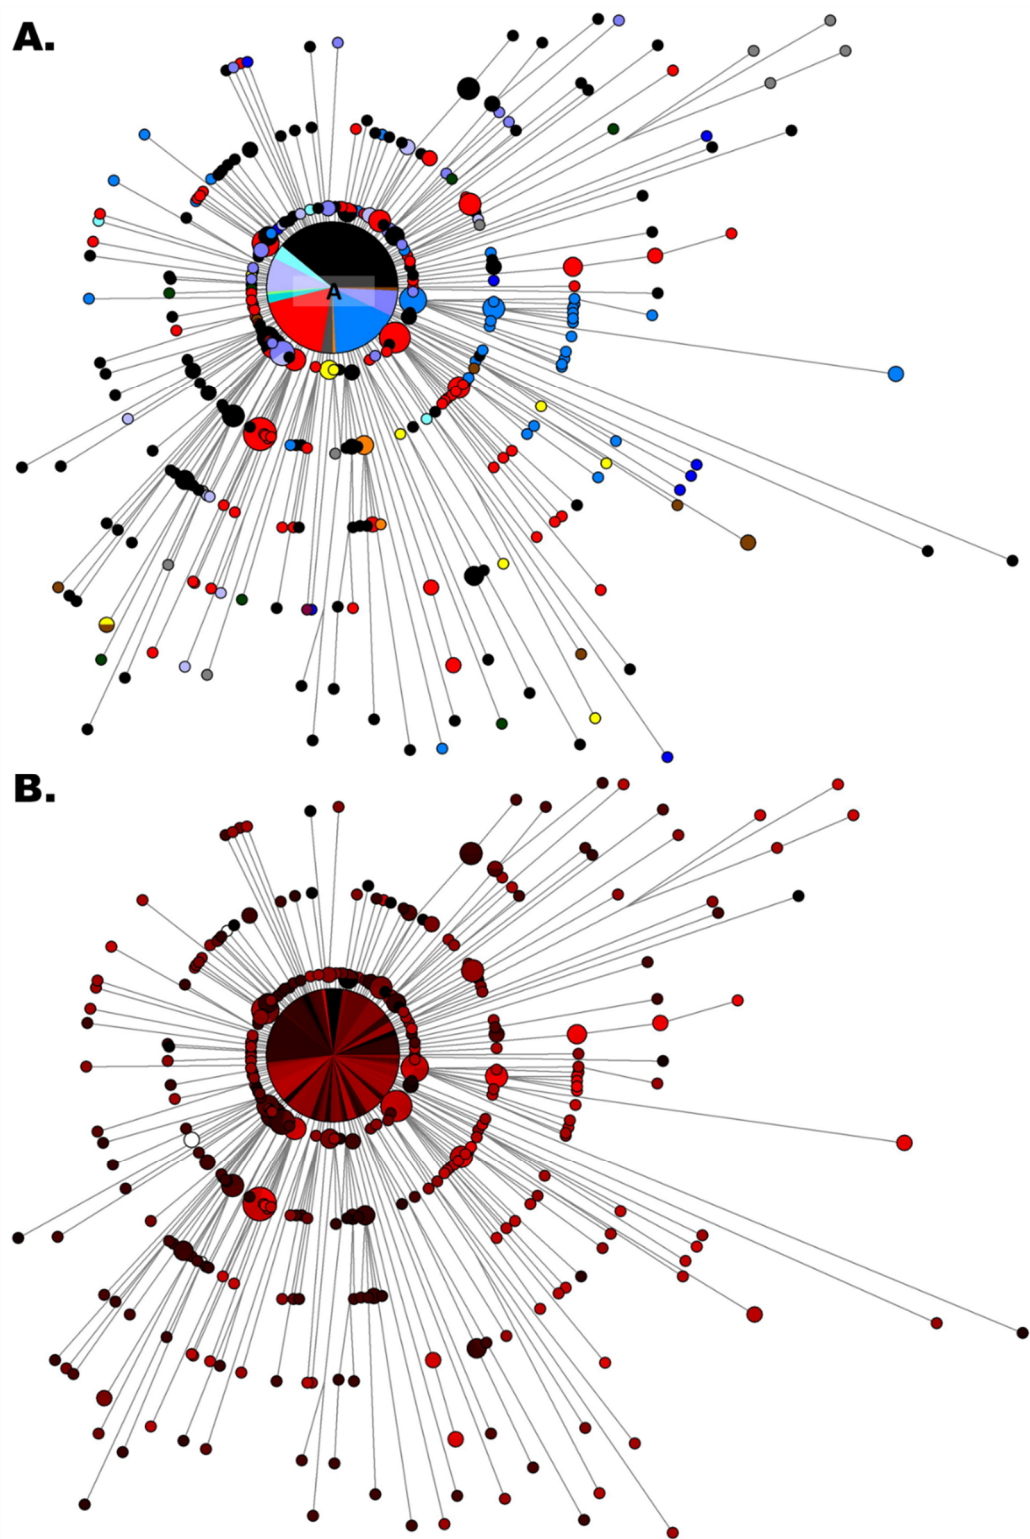

Figure S15. Reduced median network of paragon A. Samples are colored according to geography (A) and time of collection (B) following the legend in Figure S4.

**A.**

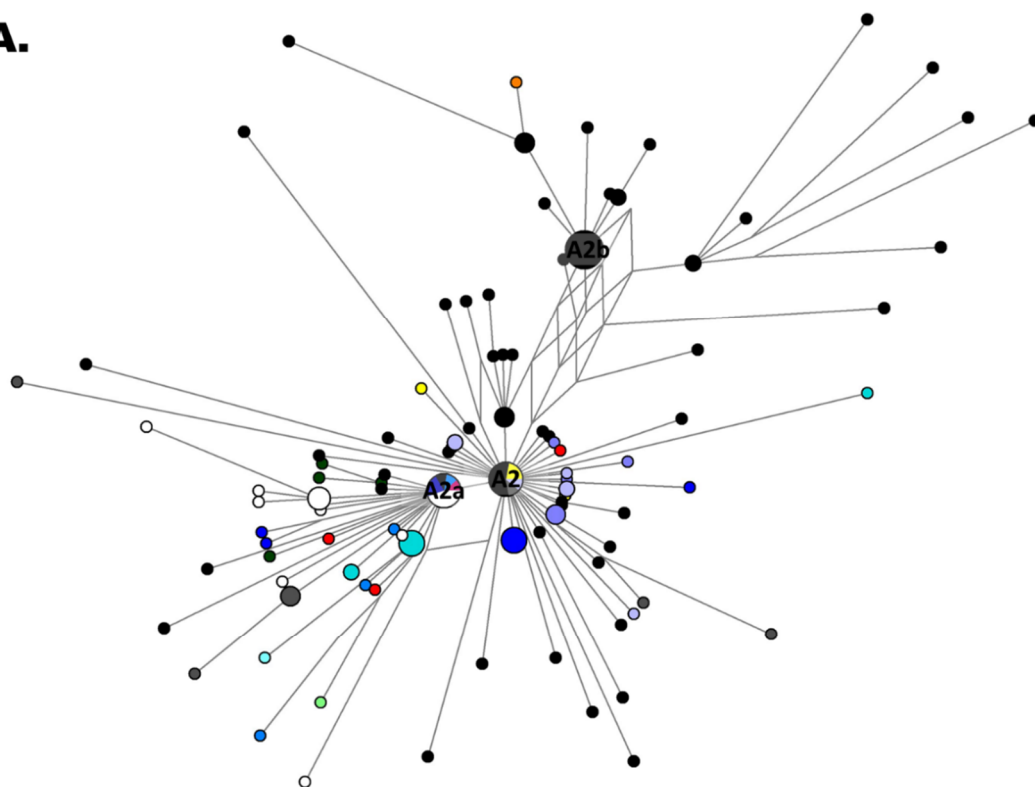

**B.**

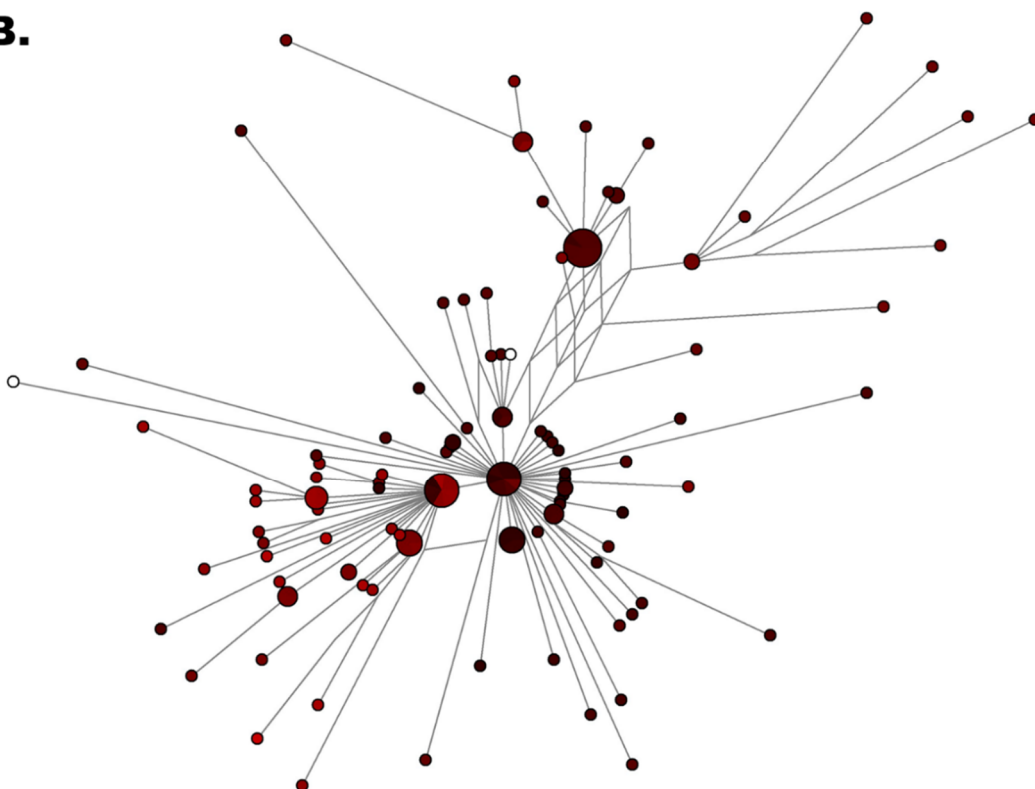

Figure S16. Reduced median network of paragroup A2. Samples are colored according to geography (A) and time of collection (B) following the legend in Figure S4.

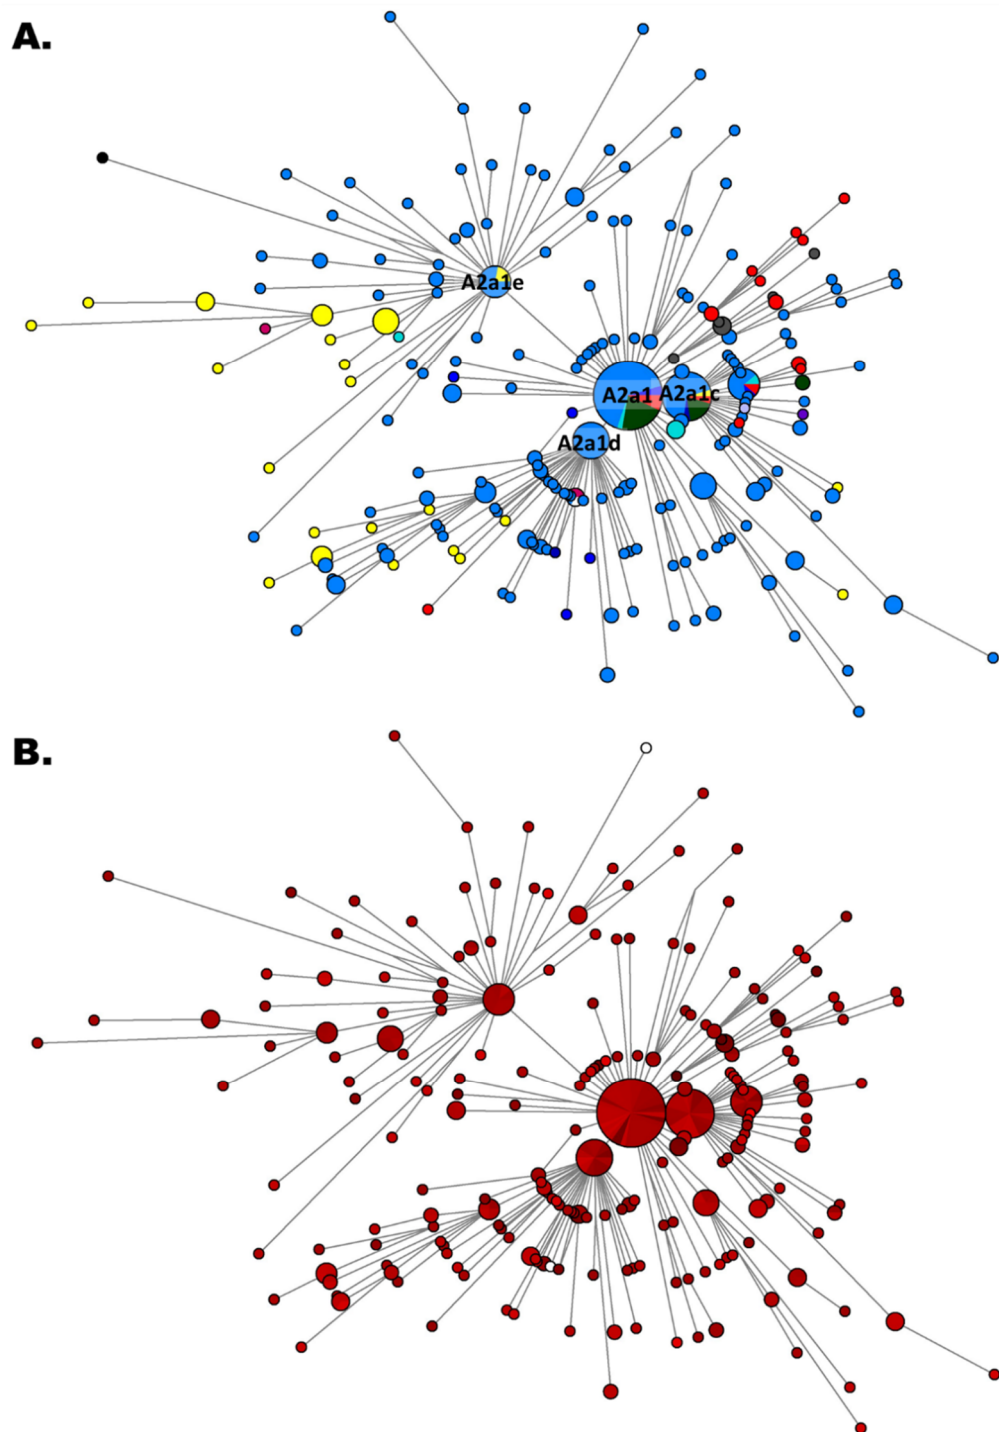

Figure S17. Reduced median network of paragroup A2a1. Samples are colored according to geography (A) and time of collection (B) following the legend in Figure S4.

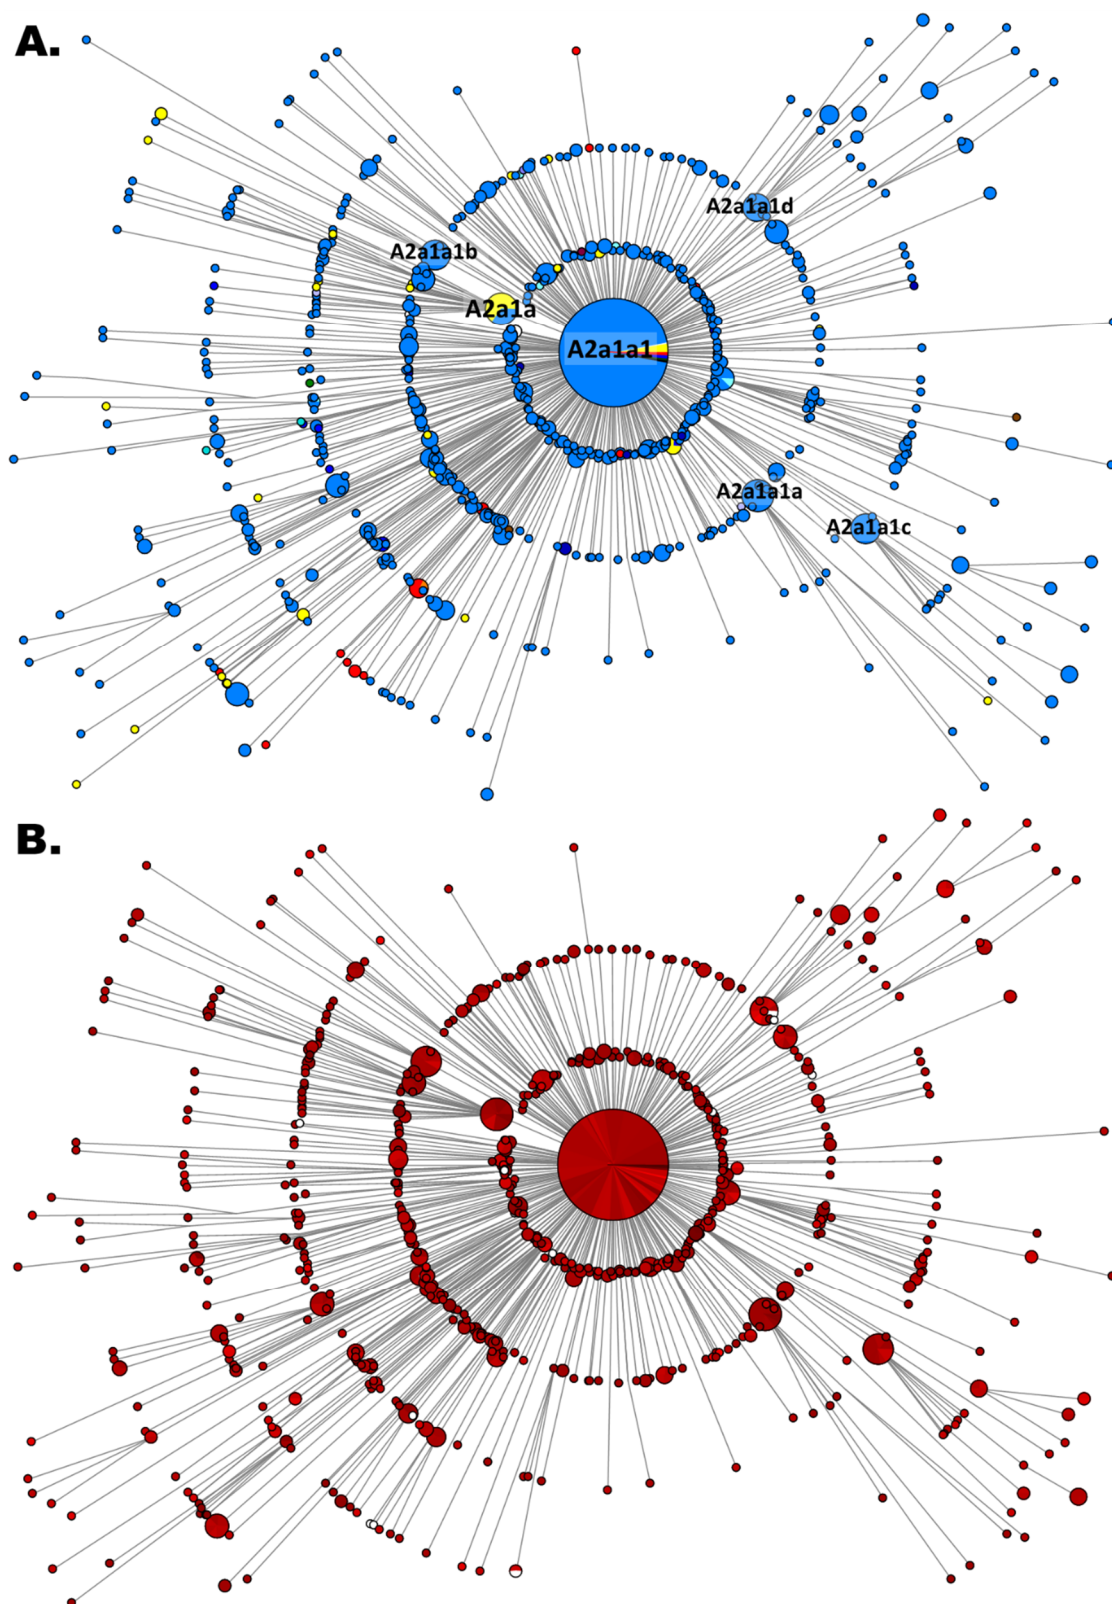

Figure S18. Reduced median network of clade A2a1a1. Samples are colored according to geography (A) and time of collection (B) following the legend in Figure S4.



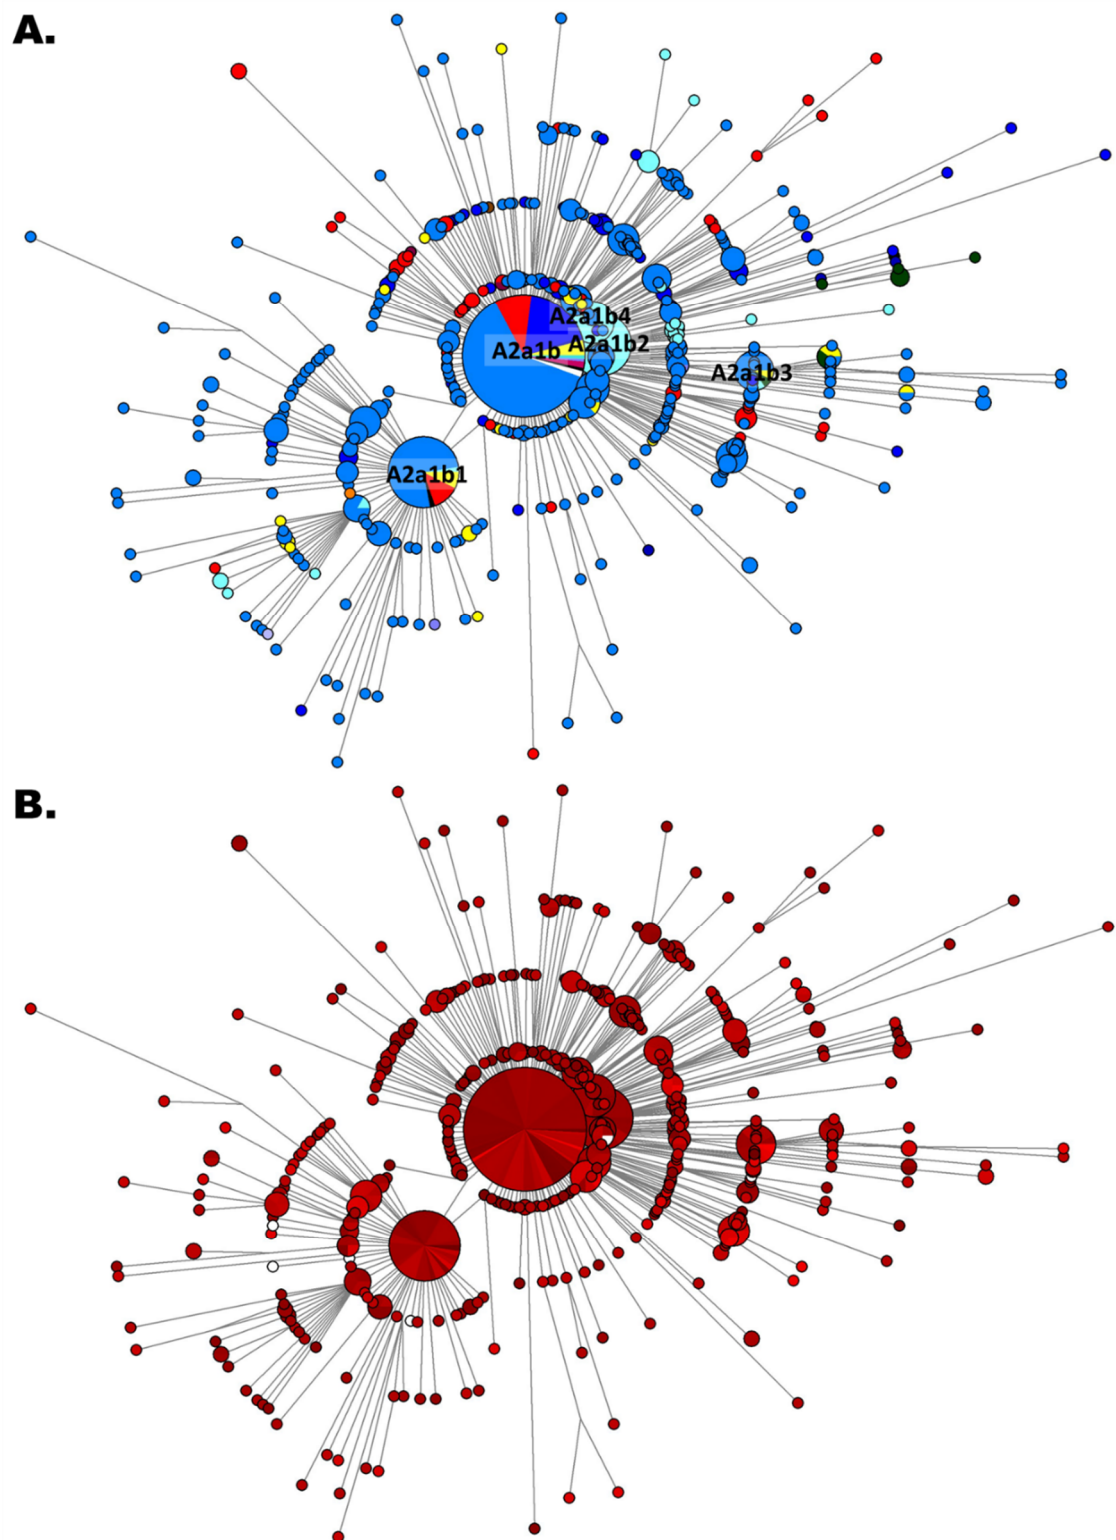

Figure S19. Reduced median network of clade A2a1b. Samples are colored according to geography (A) and time of collection (B) following the legend in Figure S4.

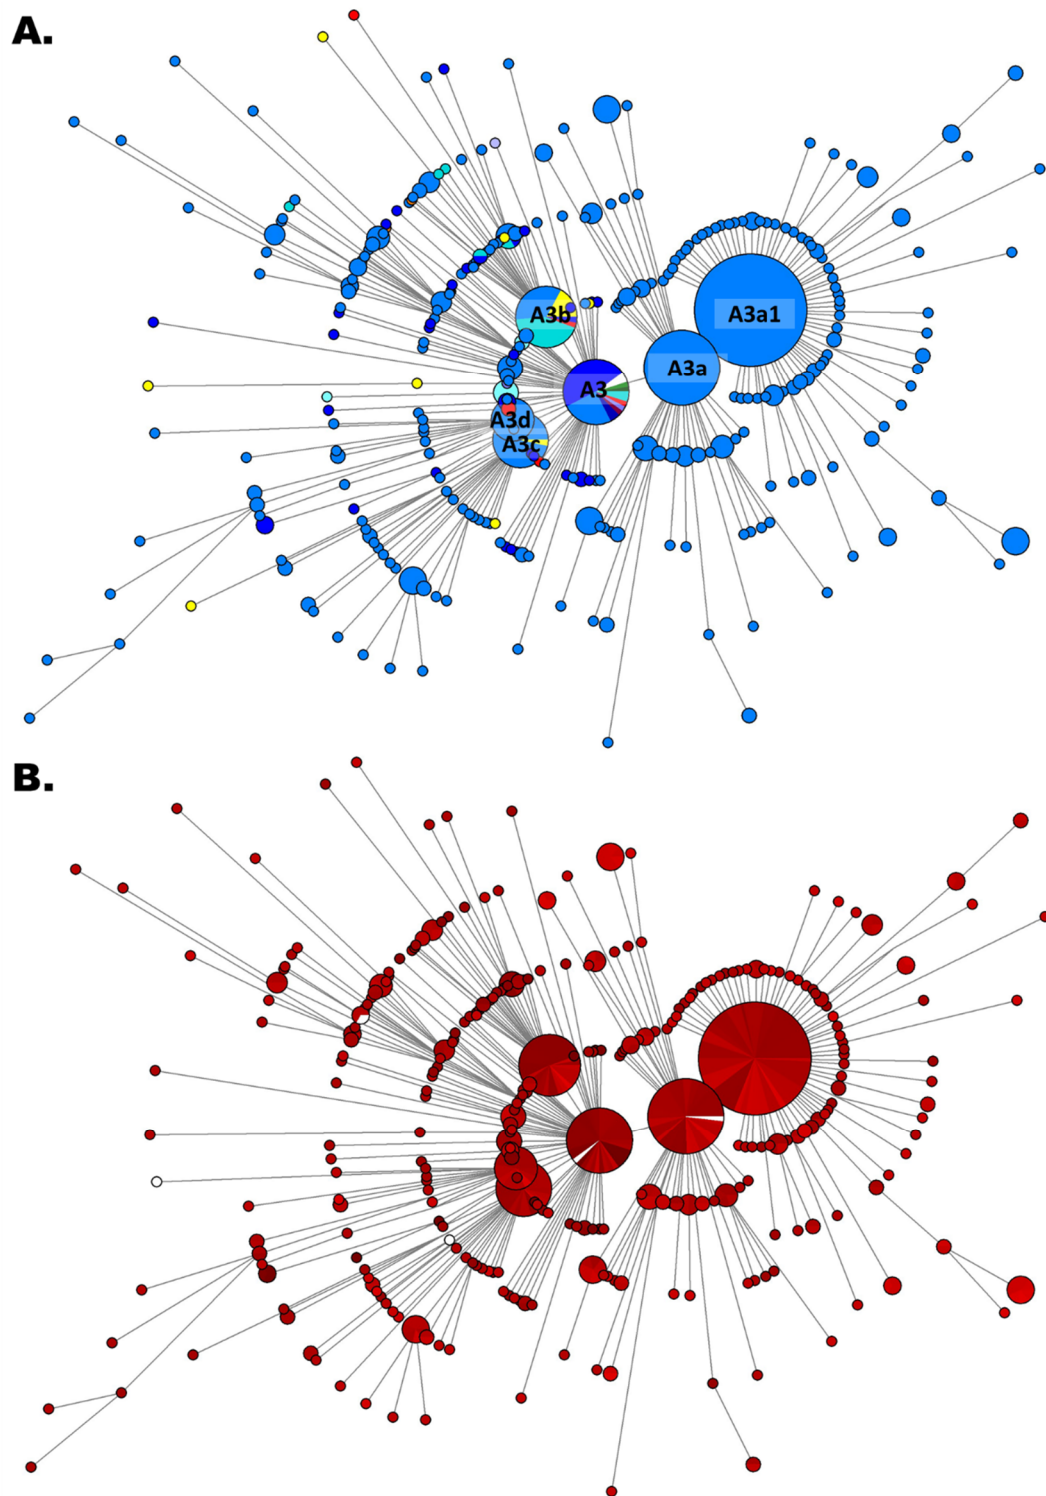

Figure S20. Reduced median network of clade A3. Samples are colored according to geography (A) and time of collection (B) following the legend in Figure S4.

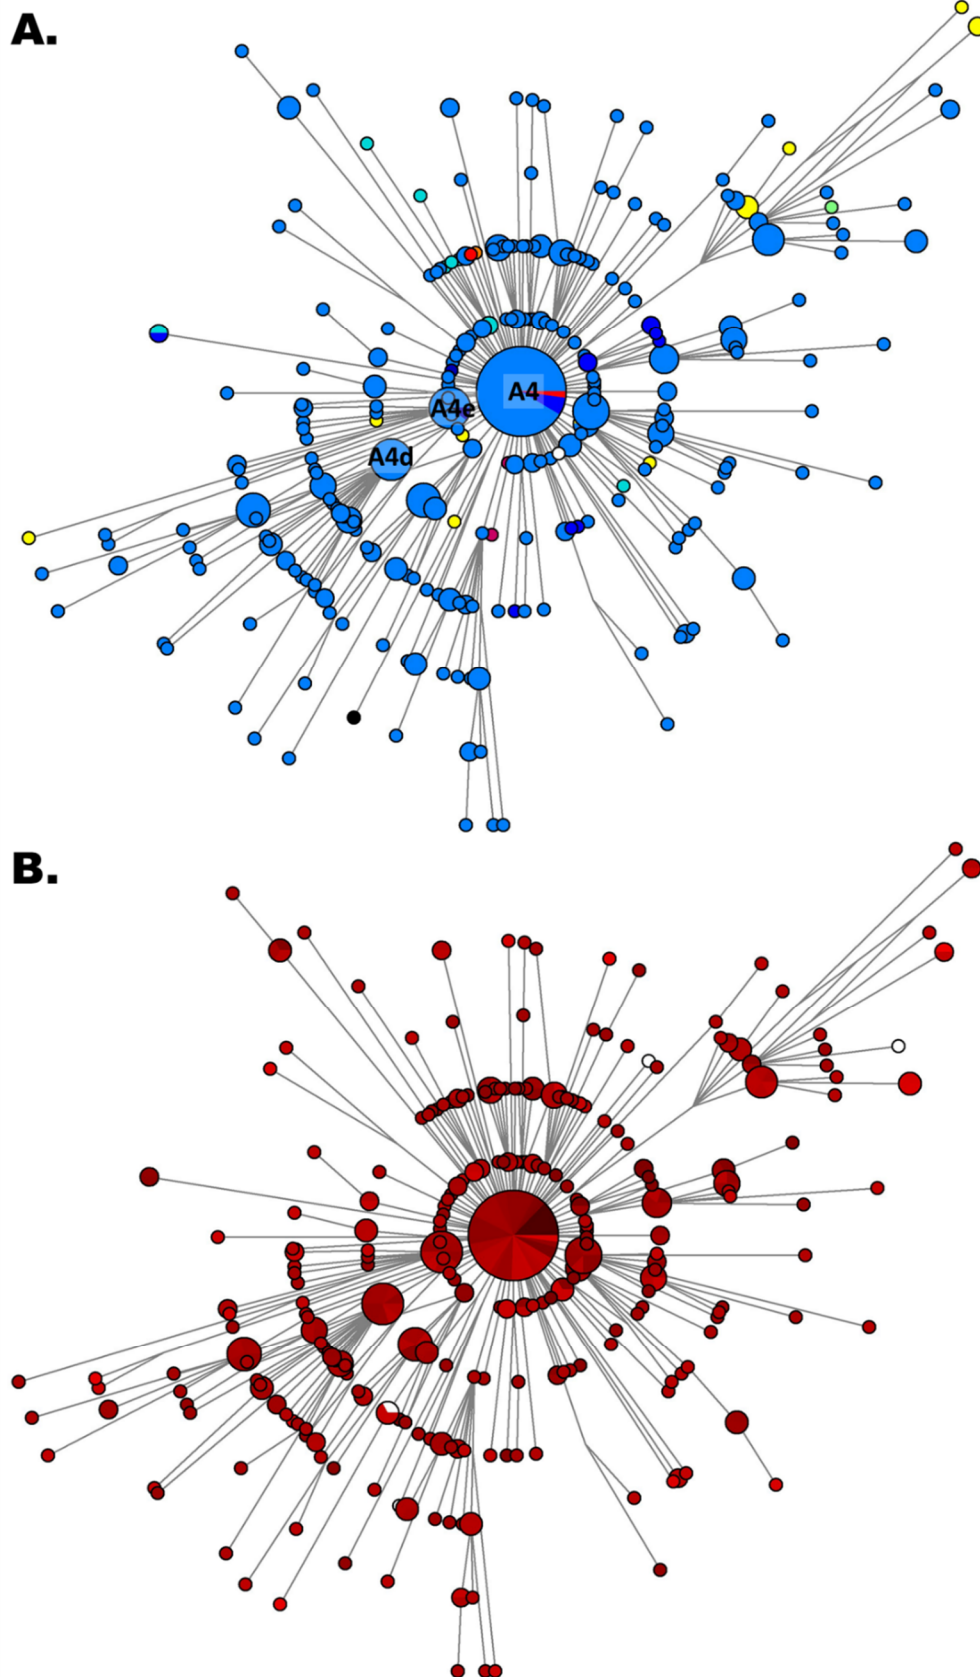

Figure S21. Reduced median network of paragroup A4. Samples are colored according to geography (A) and time of collection (B) following the legend in Figure S4.

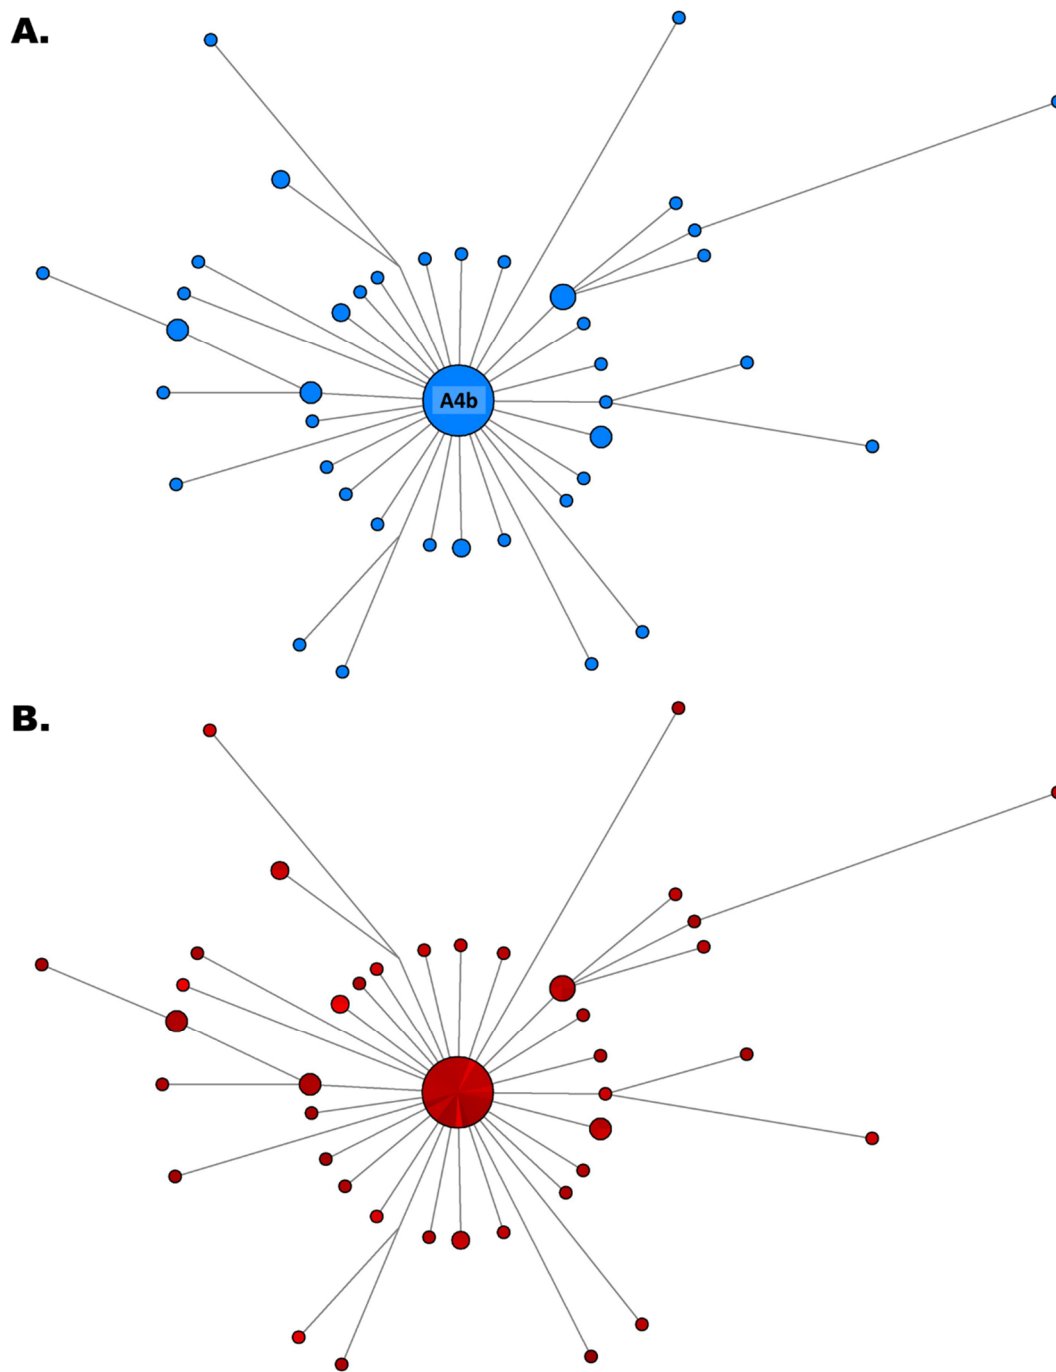

Figure S22. Reduced median network of clade A4b. Samples are colored according to geography (A) and time of collection (B) following the legend in Figure S4.



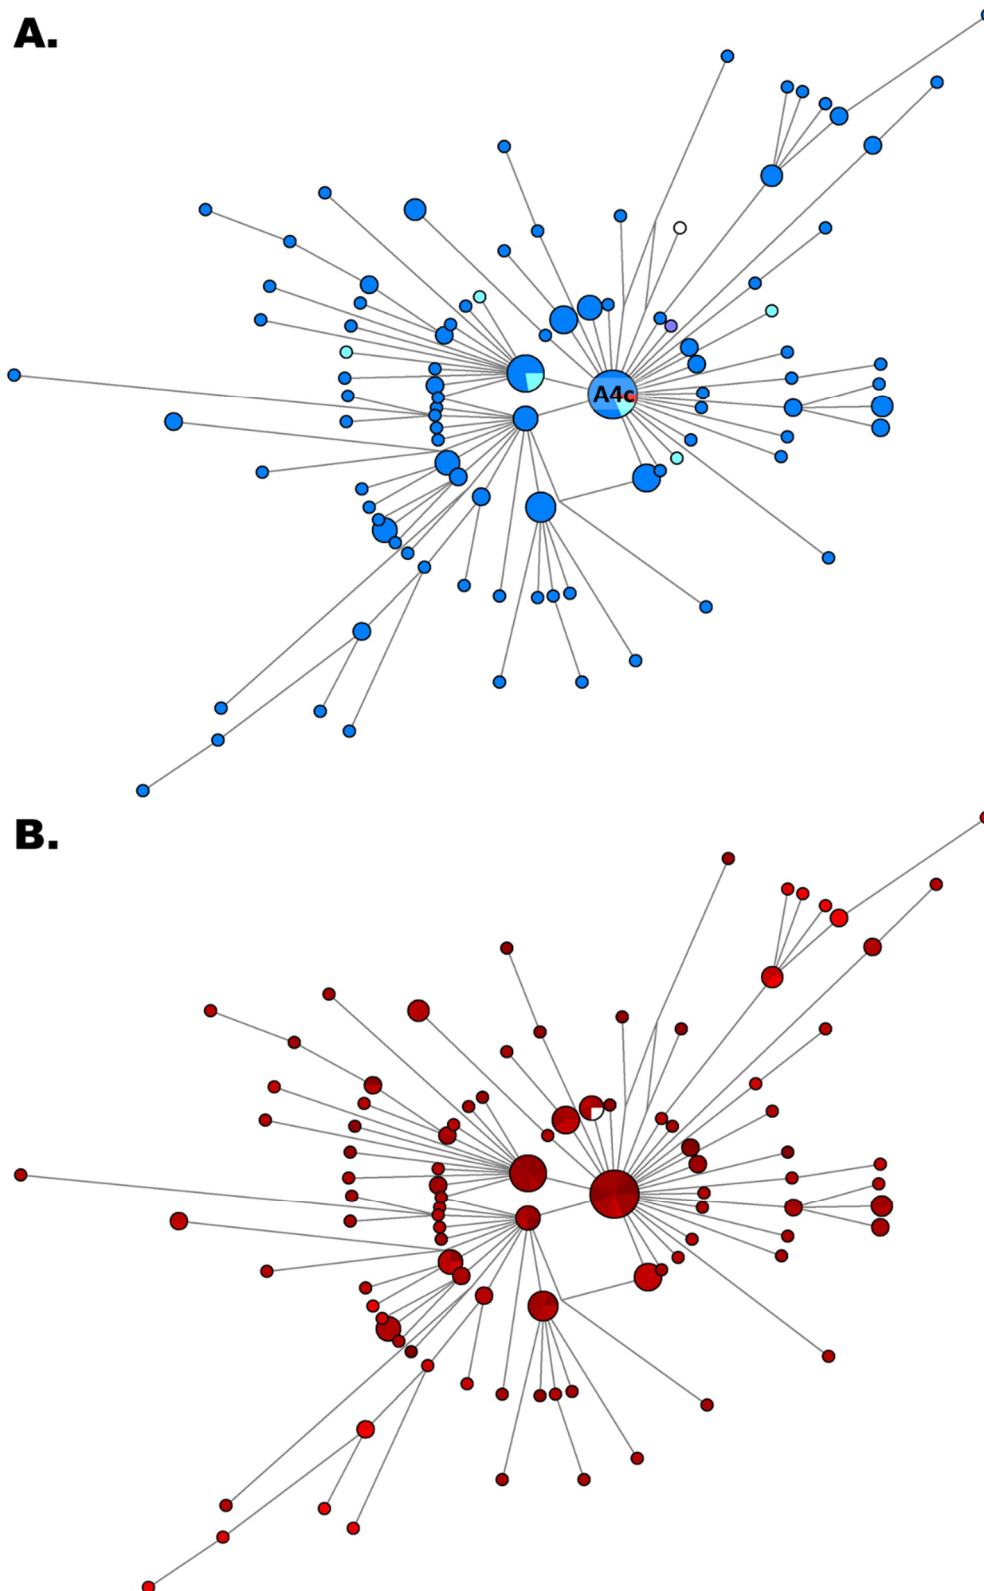

Figure S23. Reduced median network of clade A4c. Samples are colored according to geography (A) and time of collection (B) following the legend in Figure S4.

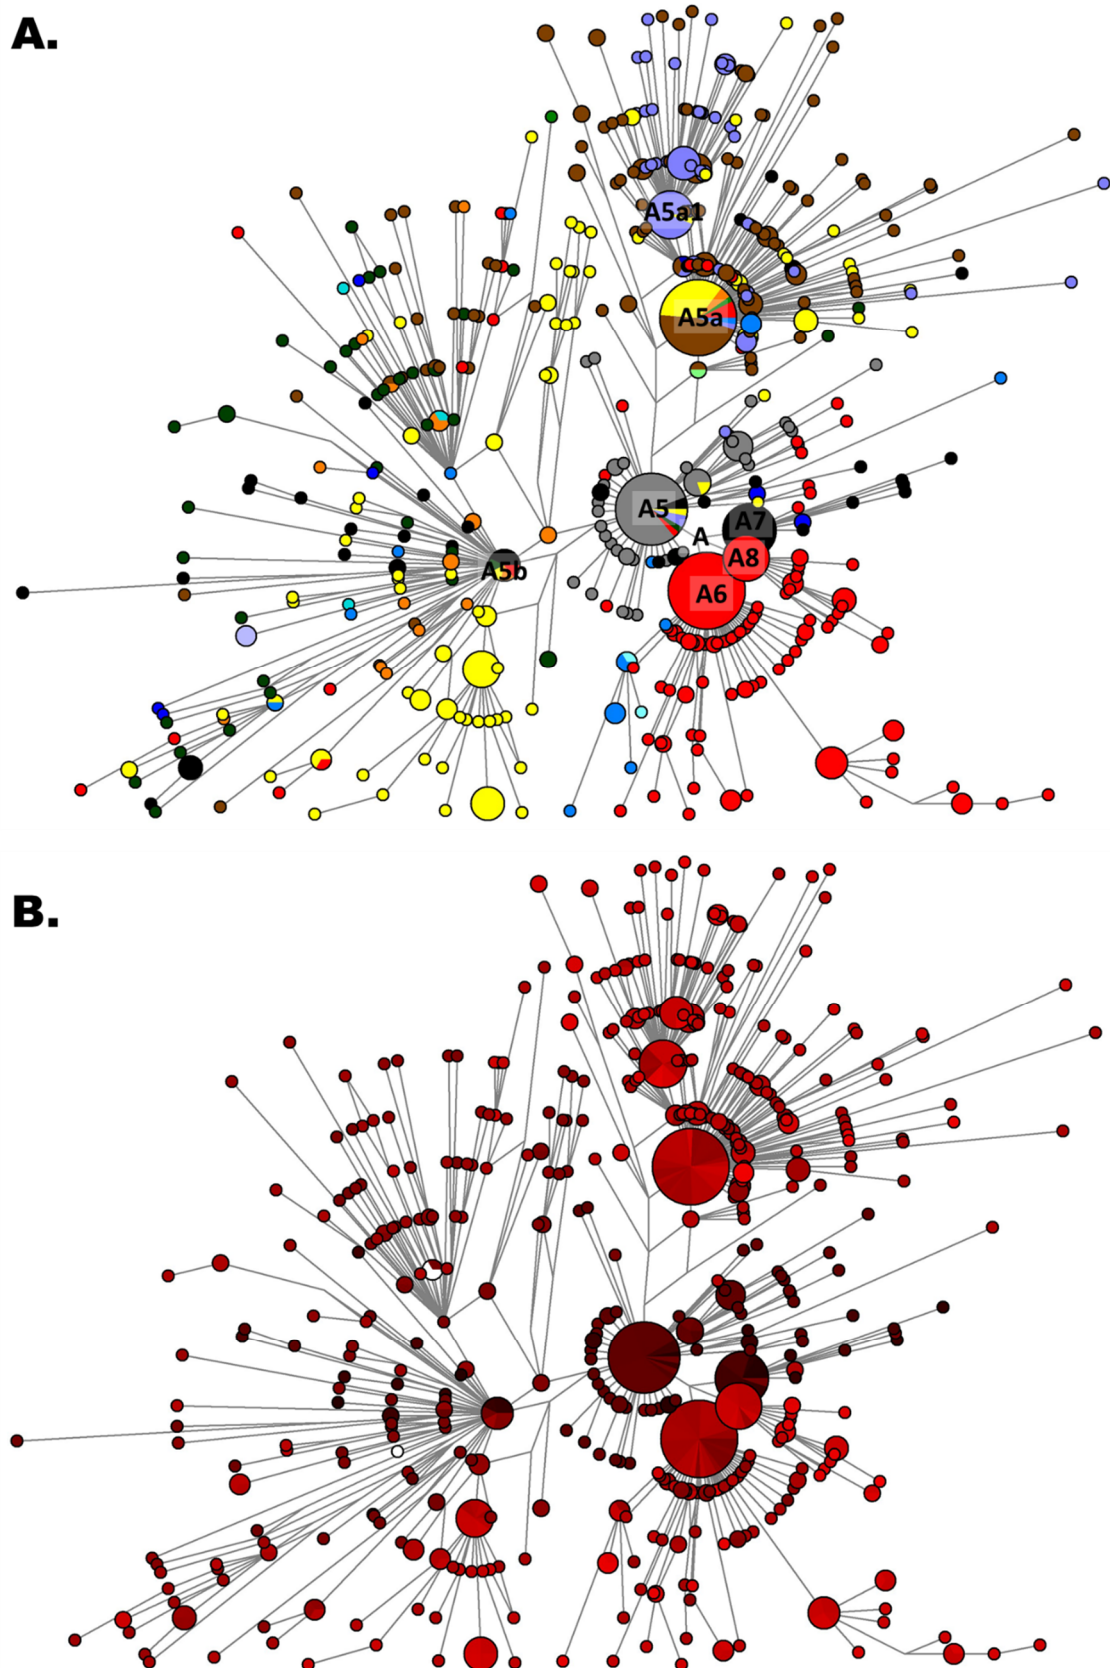

Figure S24. Reduced median network of subclade of A: A5, a6, A7 and A8. Samples are colored according to geography (A) and time of collection (B) following the legend in Figure S4.

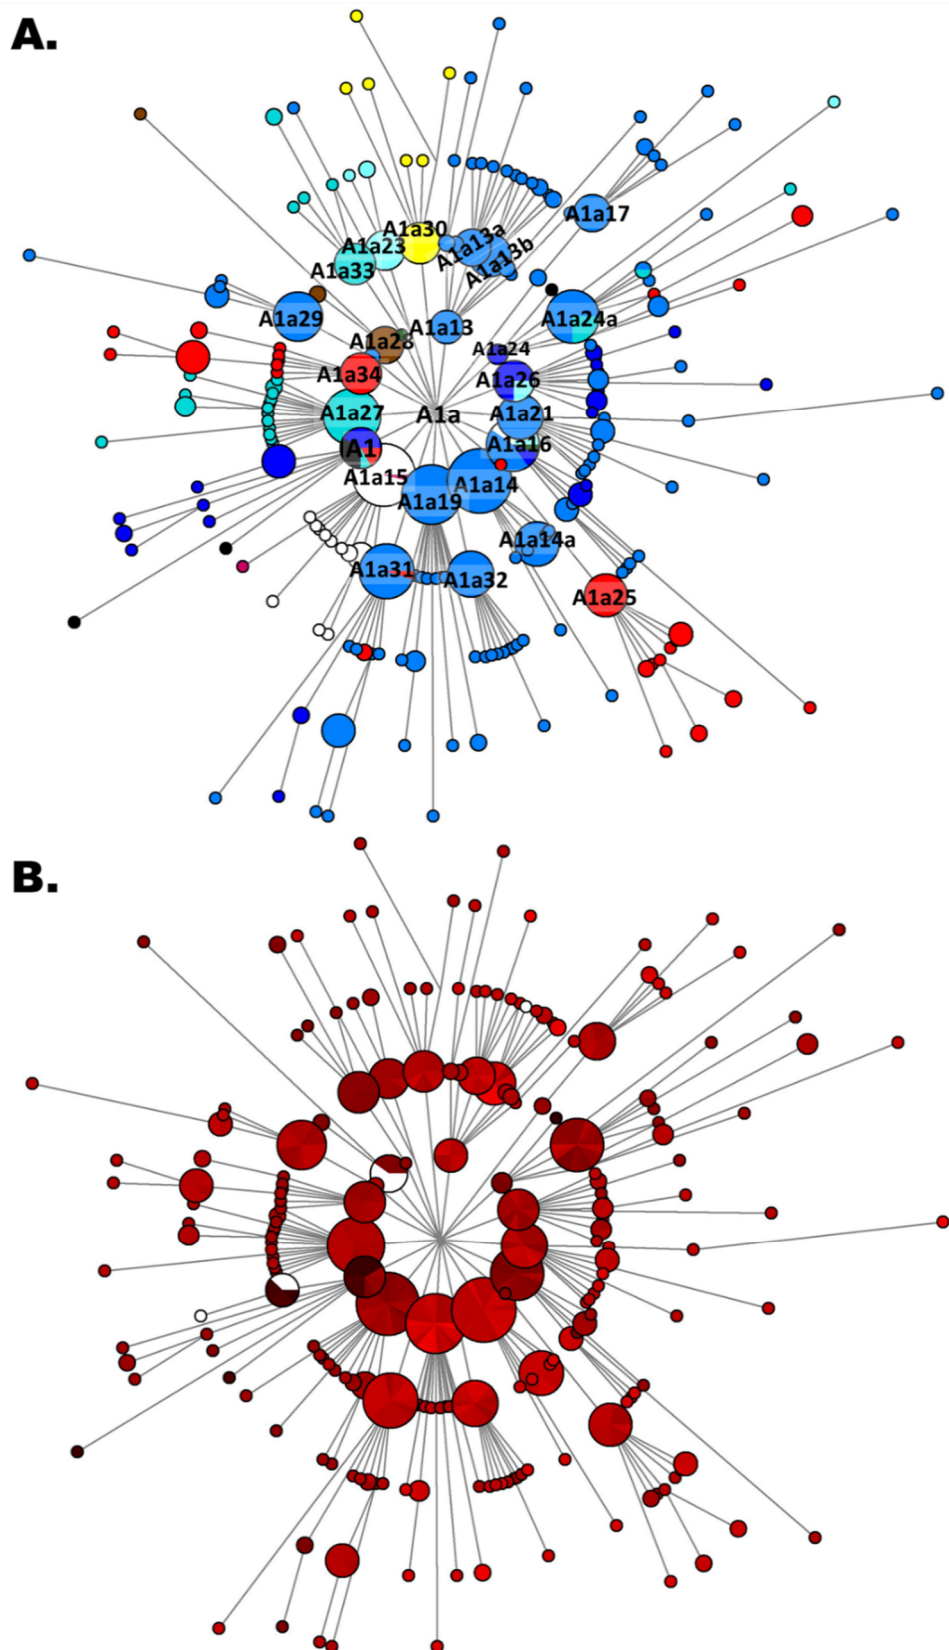

Figure S25. Reduced median network of paragroup A1 and subclade of A1a. Samples are colored according to geography (A) and time of collection (B) following the legend in Figure S4.

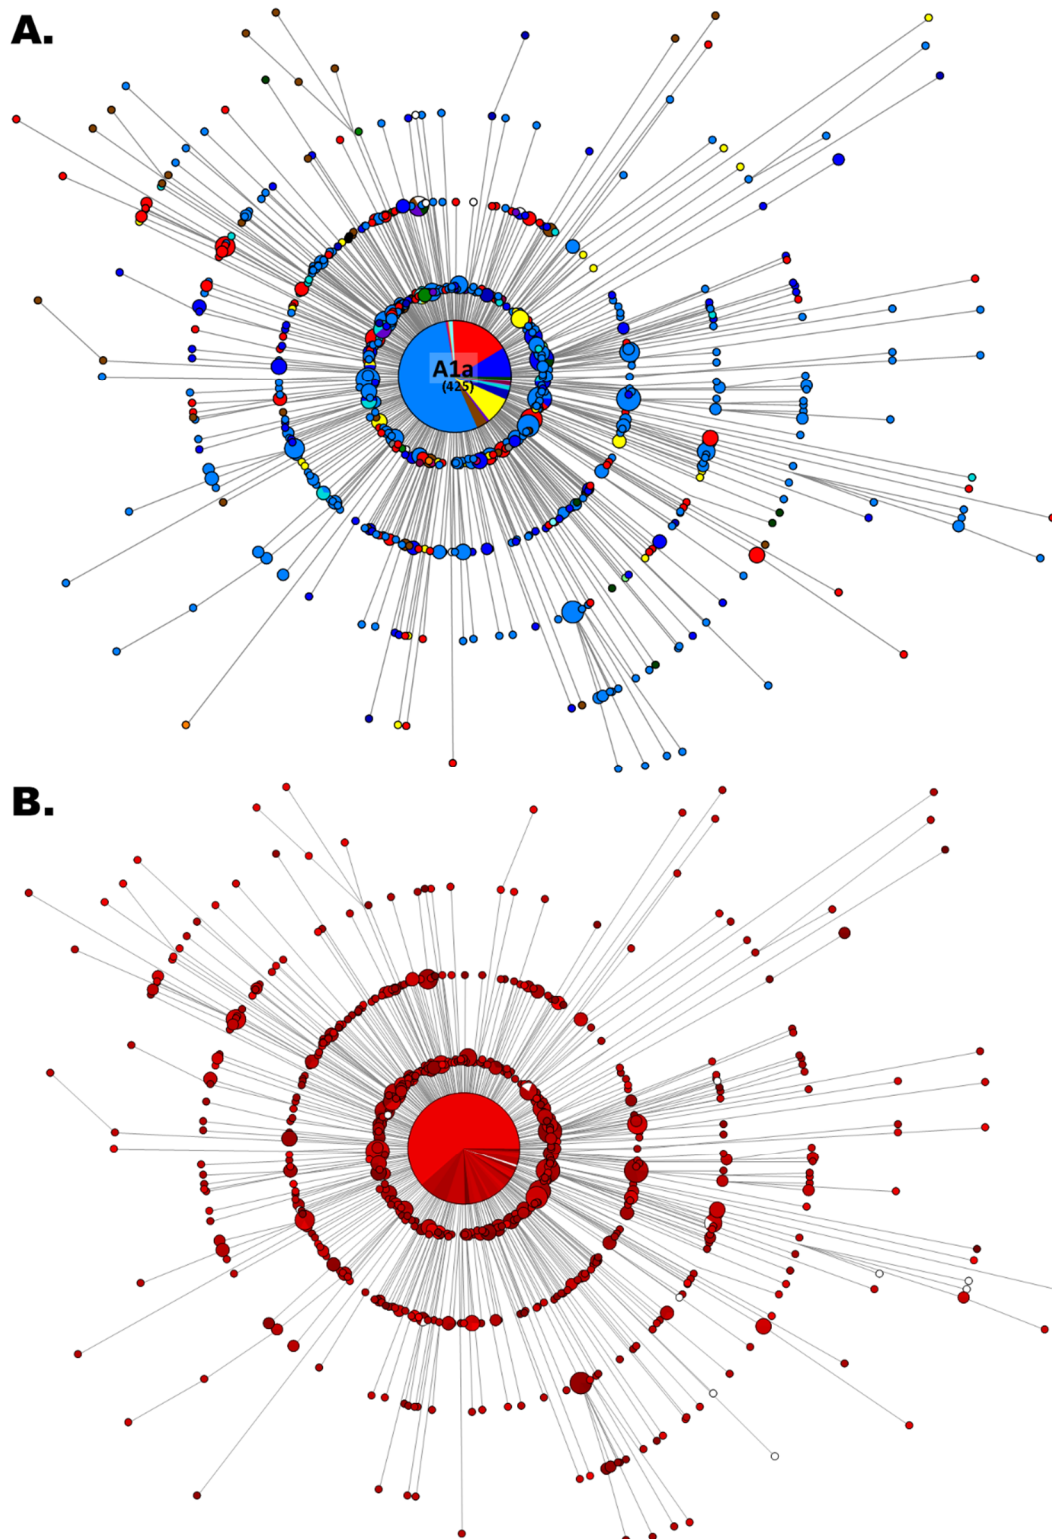

**Figure S26.** Reduced median network of paragroup A1a. The value between brackets refers to the total number of samples in the largest haplotype that is not proportional to the sample size. Samples are colored according to geography (A) and time of collection (B) following the legend in Figure S4.



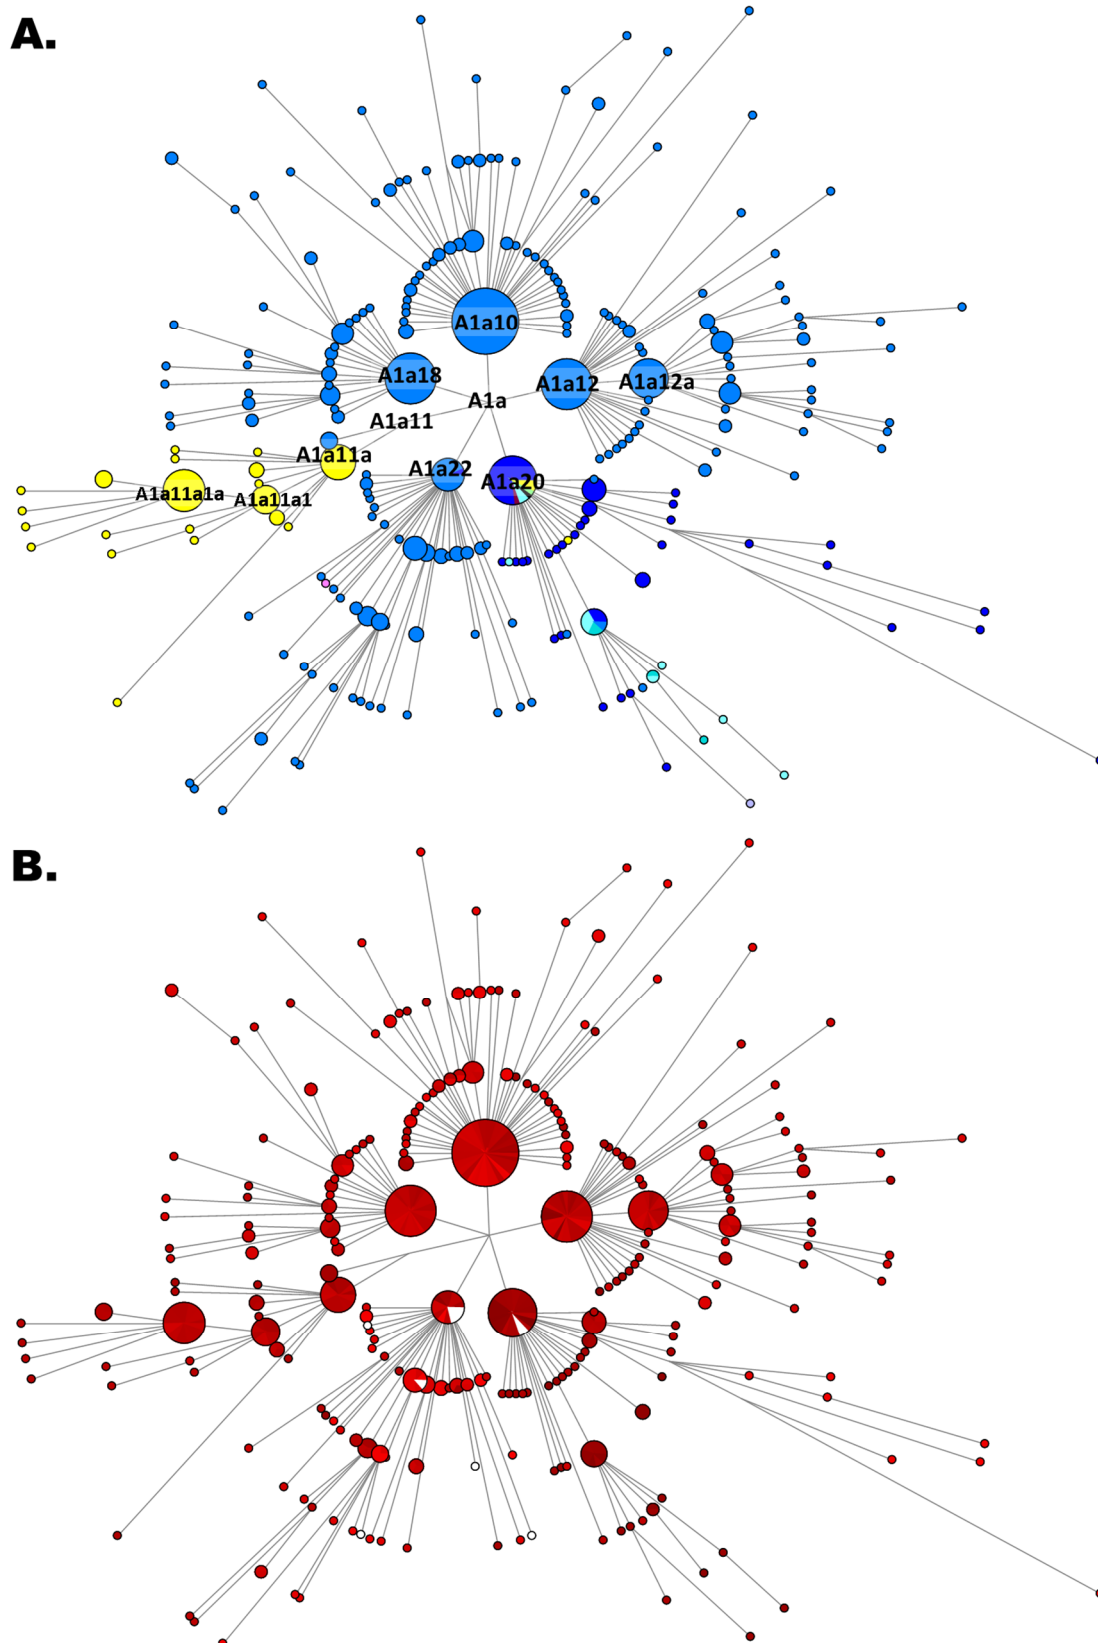

Figure S27. Reduced median network of subclades of A1a. Samples are colored according to geography (A) and time of collection (B) following the legend in Figure S4.

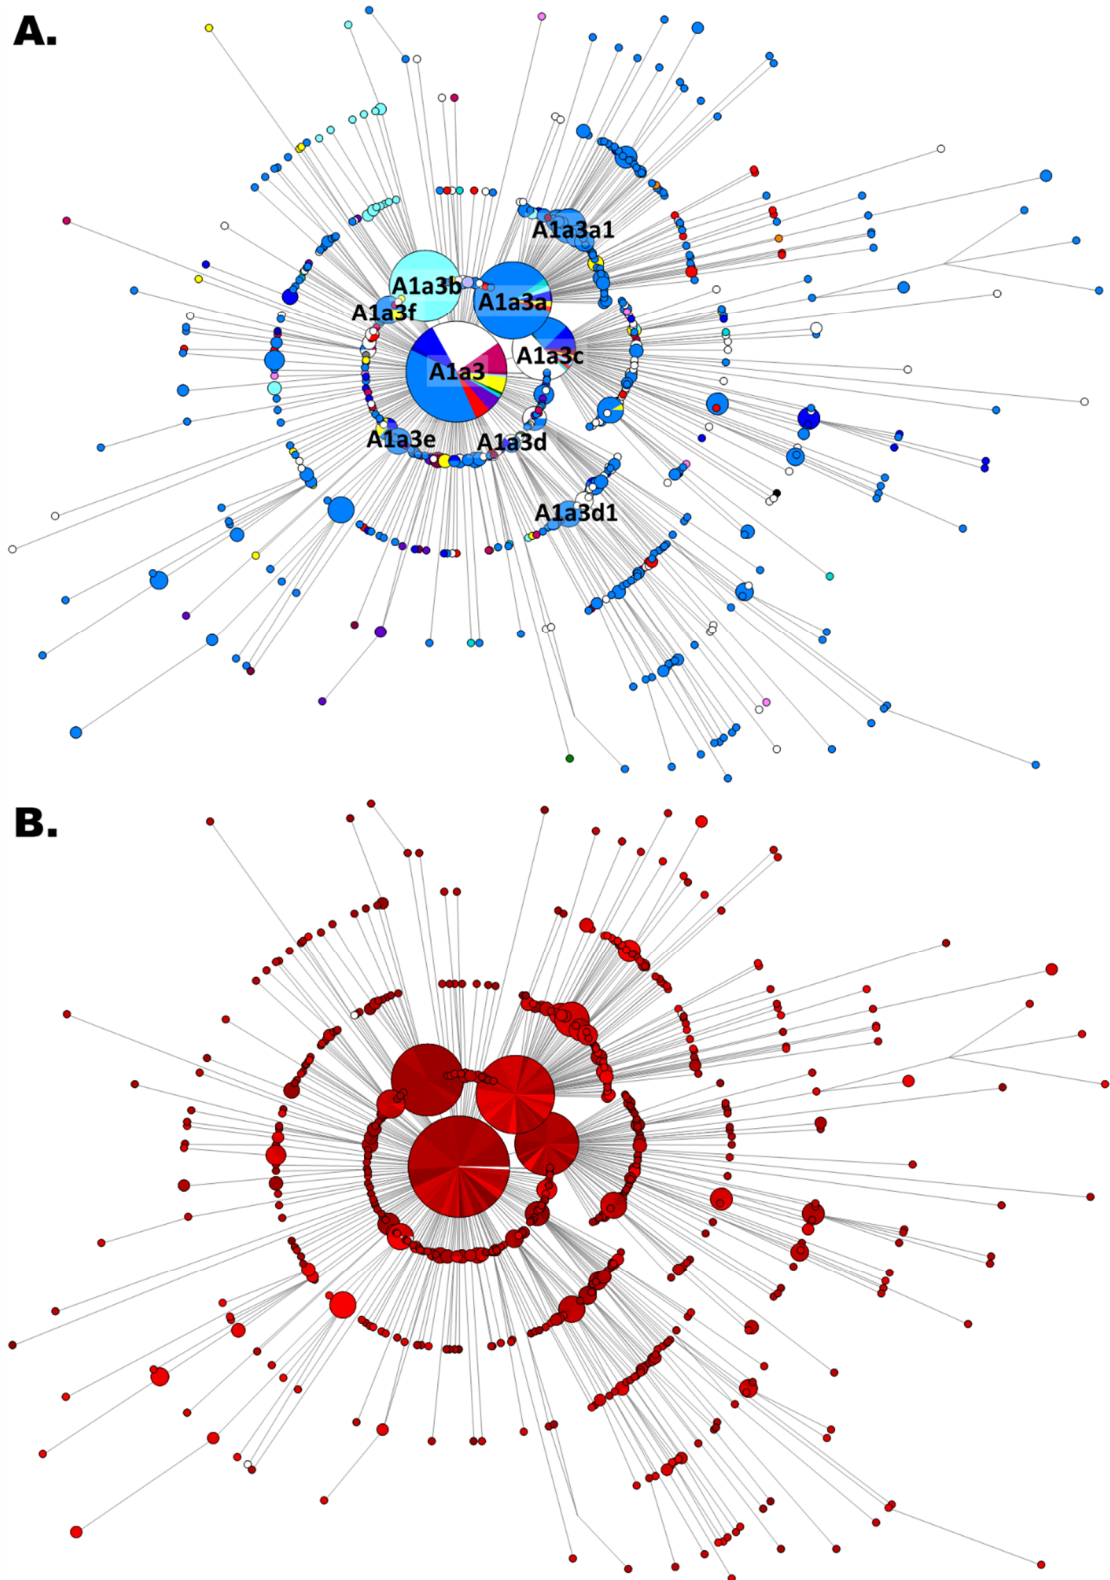

Figure S28. Reduced median network of clade A1a3. Samples are colored according to geography (A) and time of collection (B) following the legend in Figure S4.

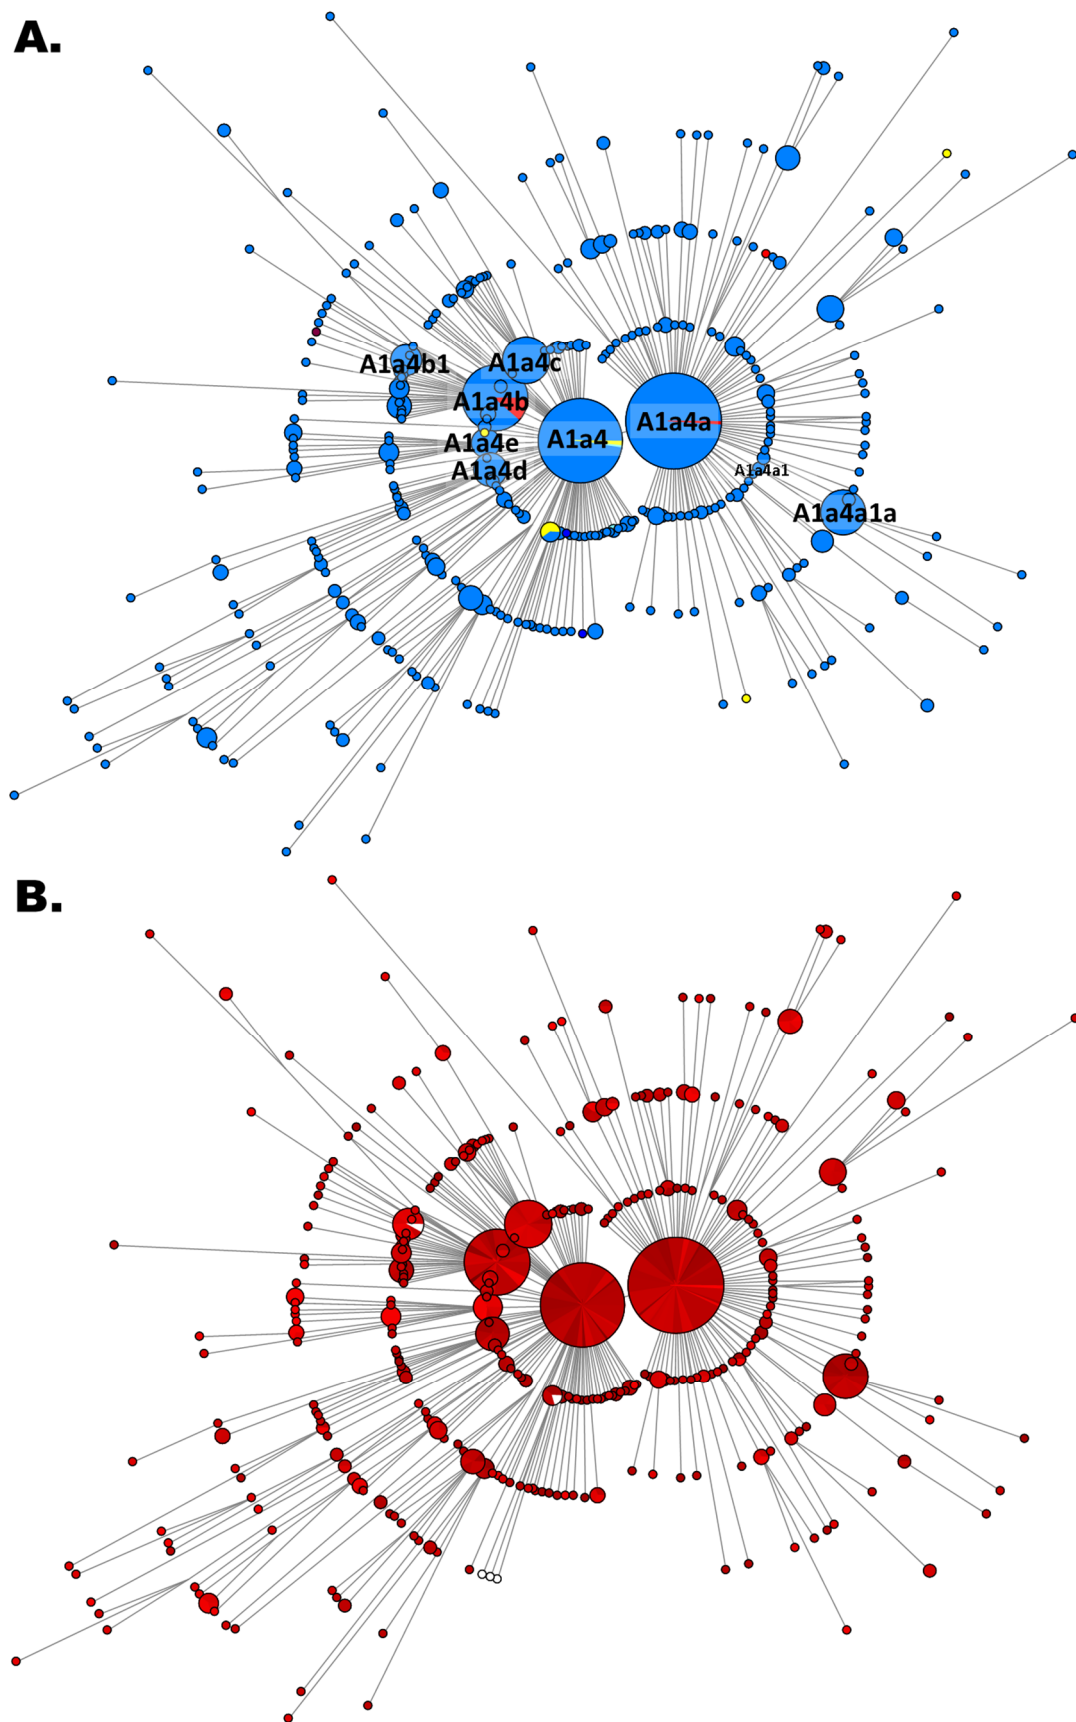

Figure S29. Reduced median network of clade A1a4. Samples are colored according to geography (A) and time of collection (B) following the legend in Figure S4.

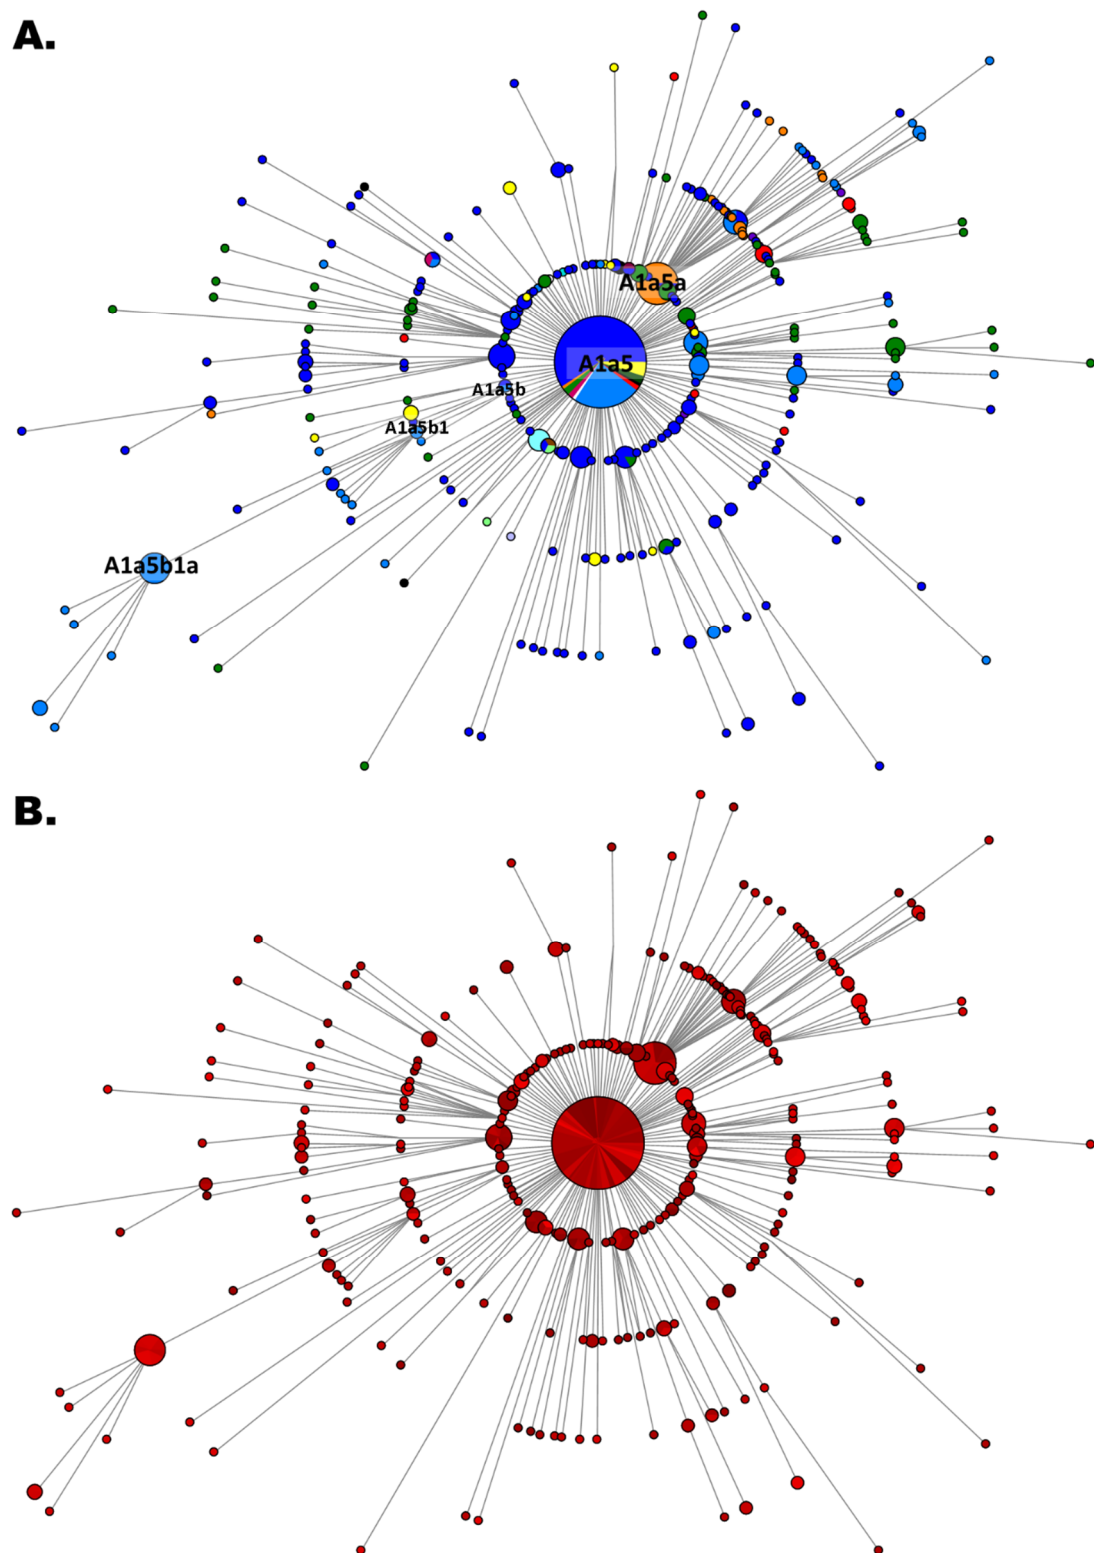

Figure S30. Reduced median network of clade A1a5. Samples are colored according to geography (A) and time of collection (B) following the legend in Figure S4.



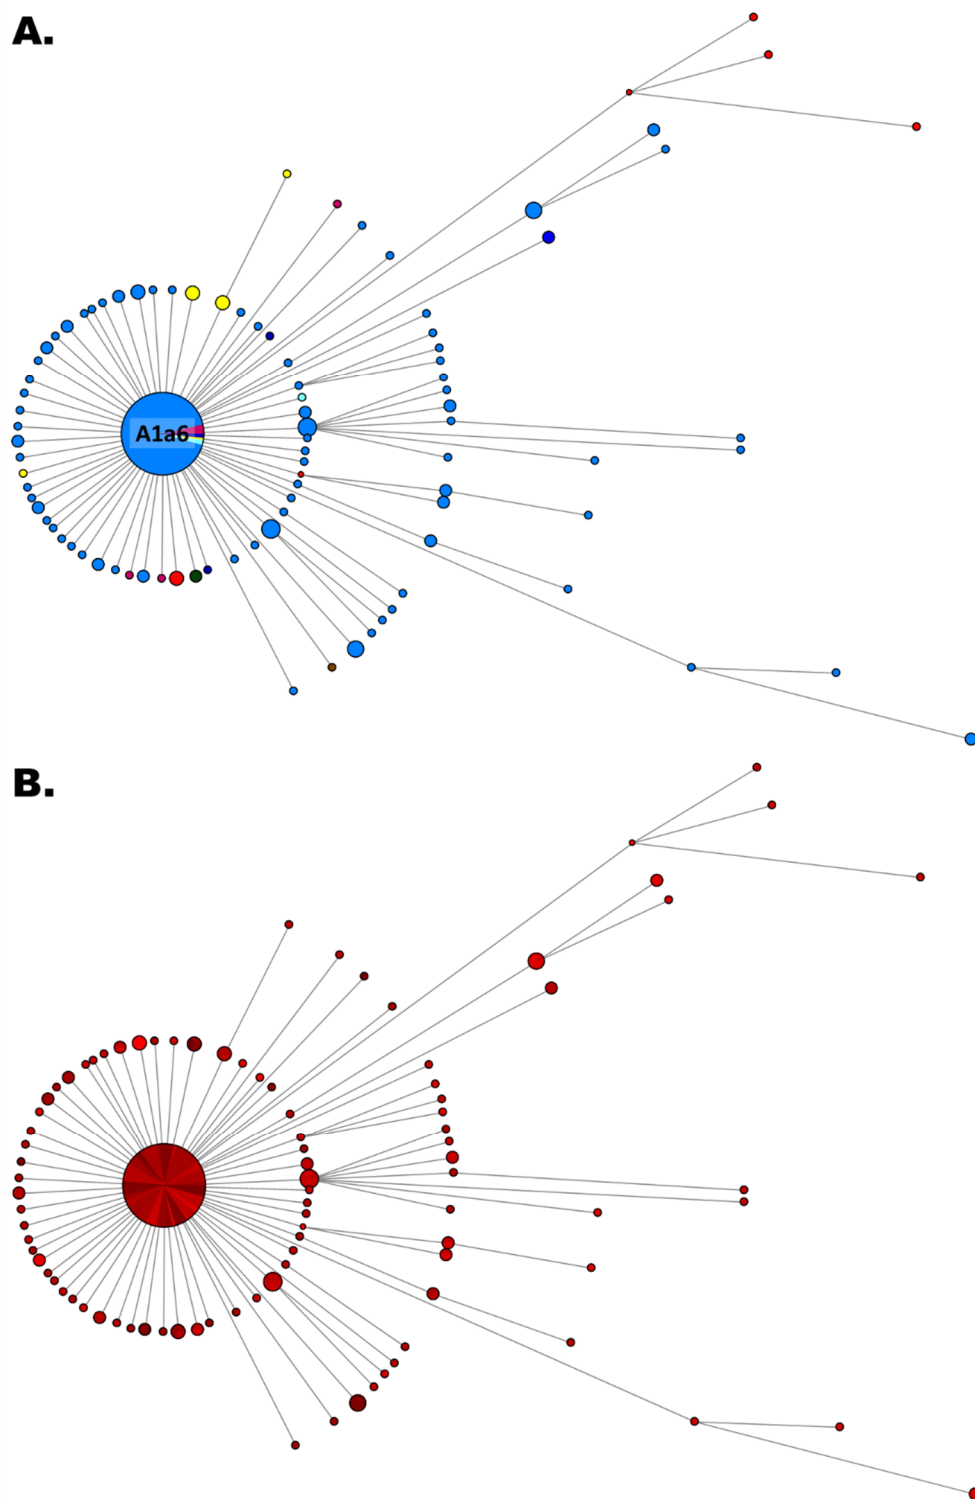

Figure S31. Reduced median network of clade A1a6. Samples are colored according to geography (A) and time of collection (B) following the legend in Figure S4.

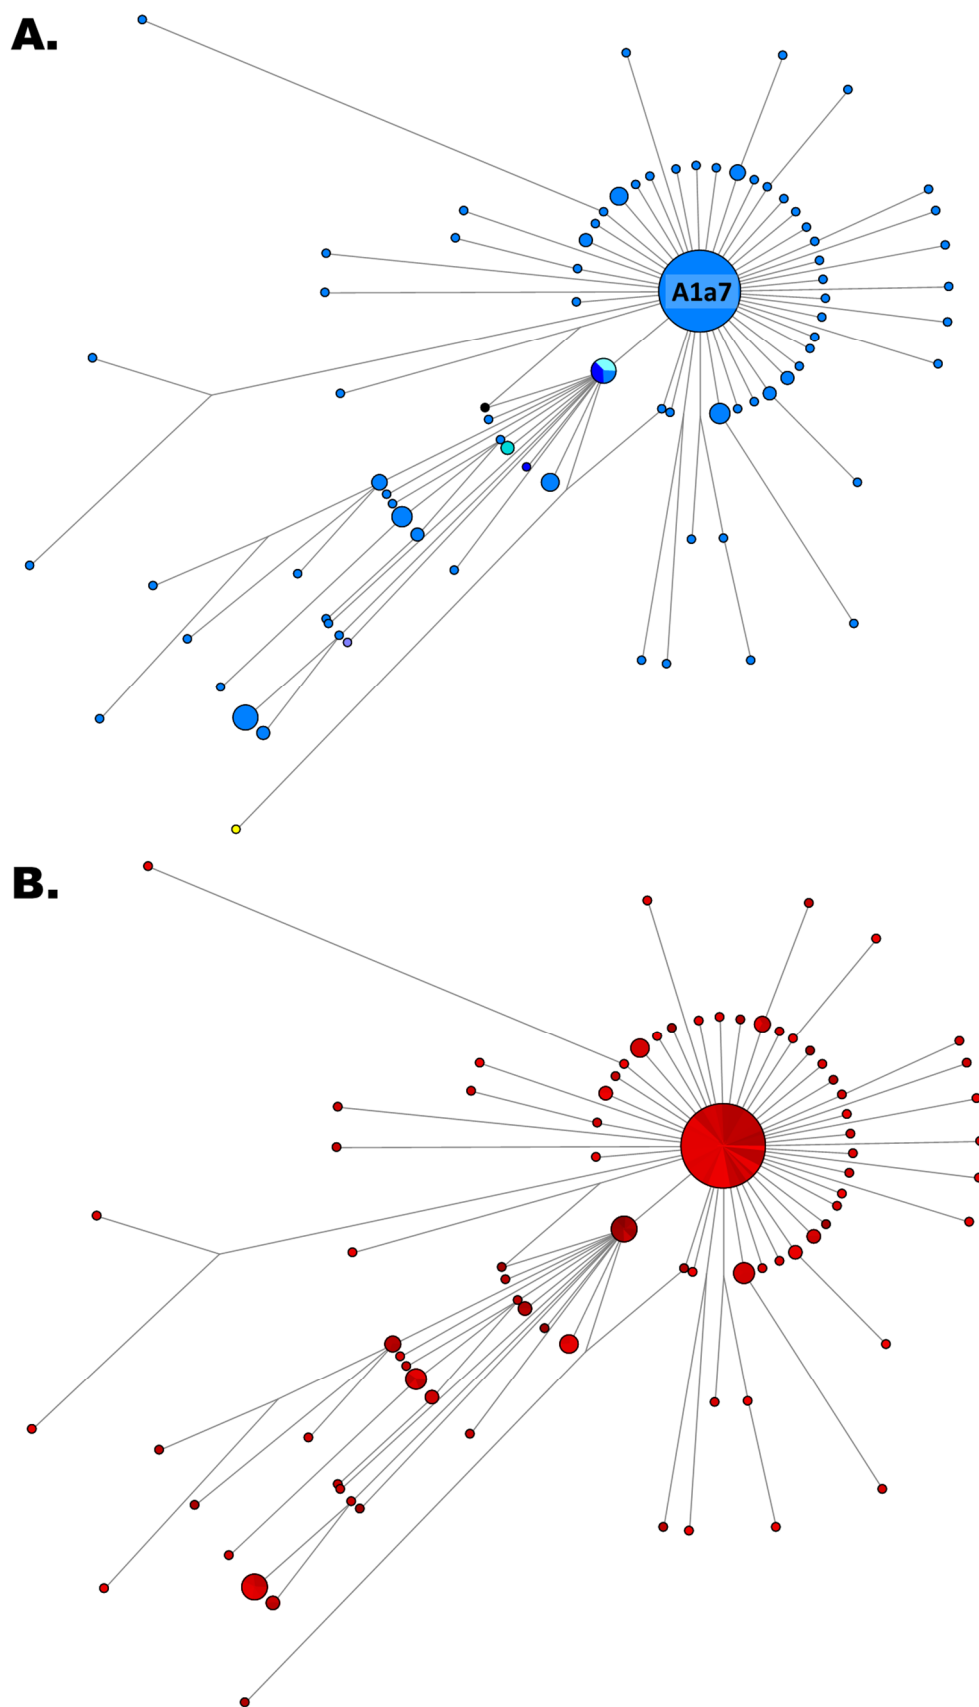

Figure S32. Reduced median network of clade A1a7. Samples are colored according to geography (A) and time of collection (B) following the legend in Figure S4.

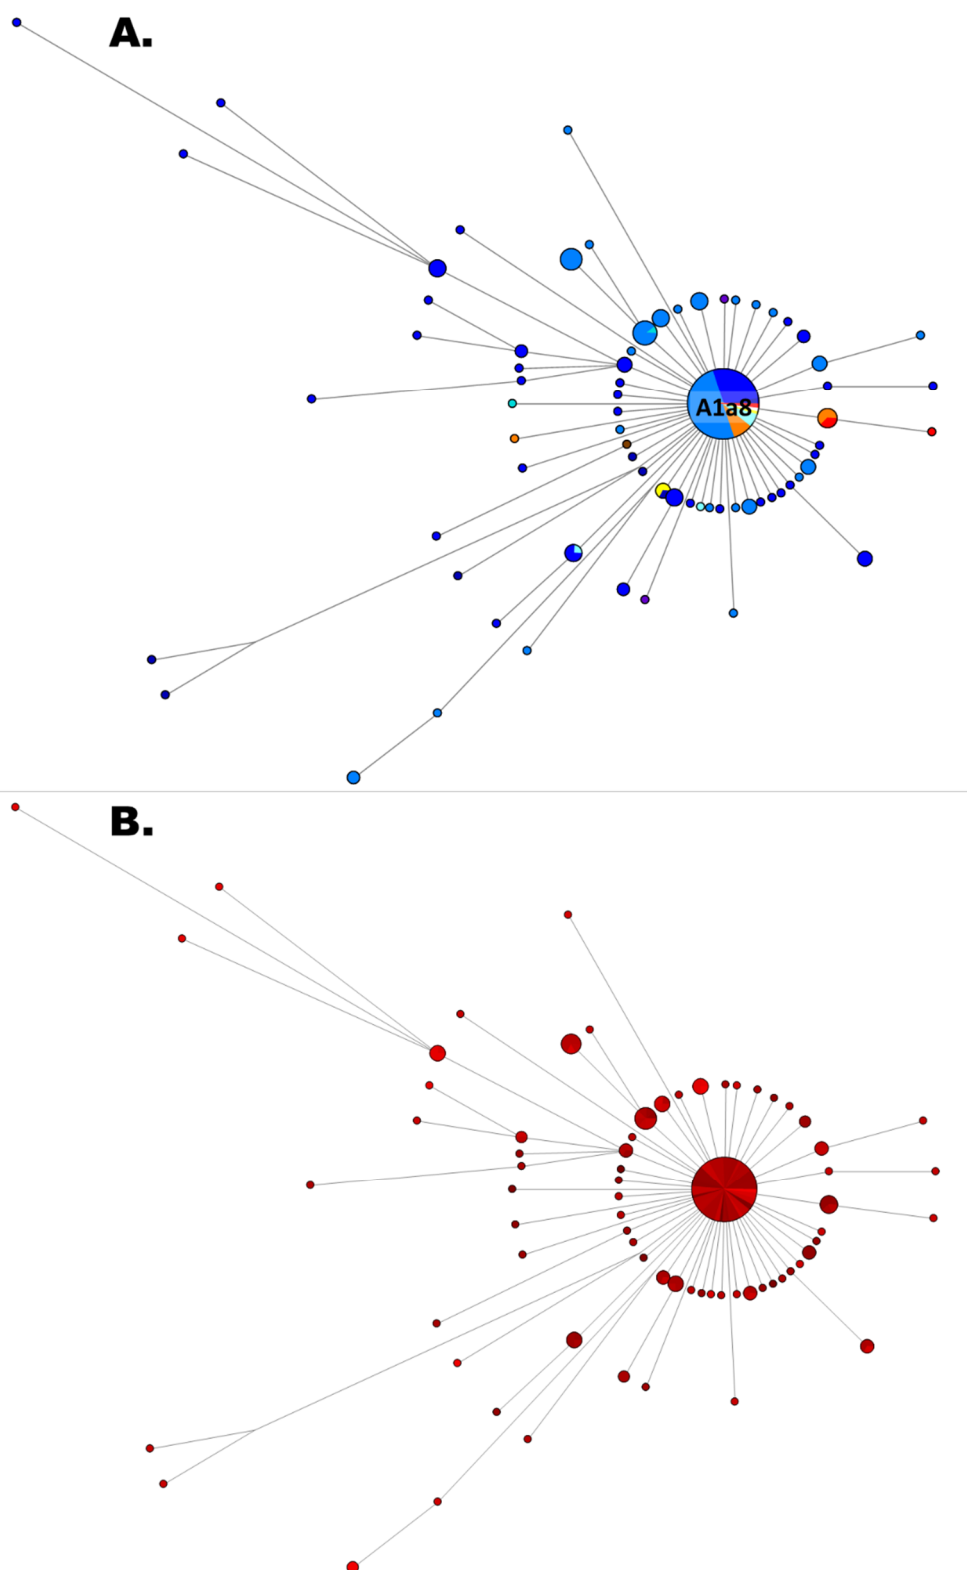

Figure S33. Reduced median network of clade A1a8. Samples are colored according to geography (A) and time of collection (B) following the legend in Figure S4.

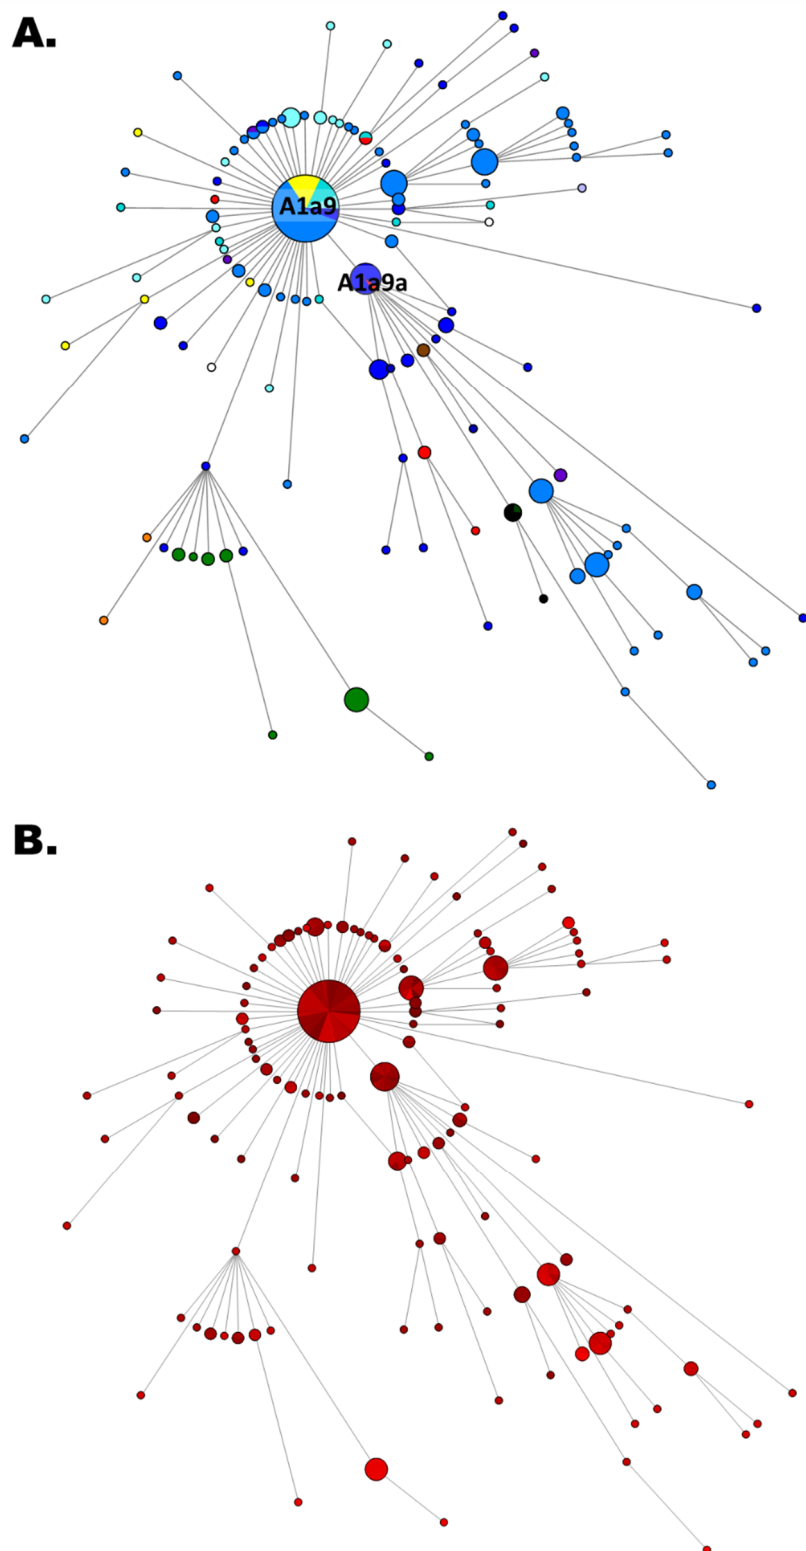

Figure S34. Reduced median network of clade A1a9. Samples are colored according to geography (A) and time of collection (B) following the legend in Figure S4.



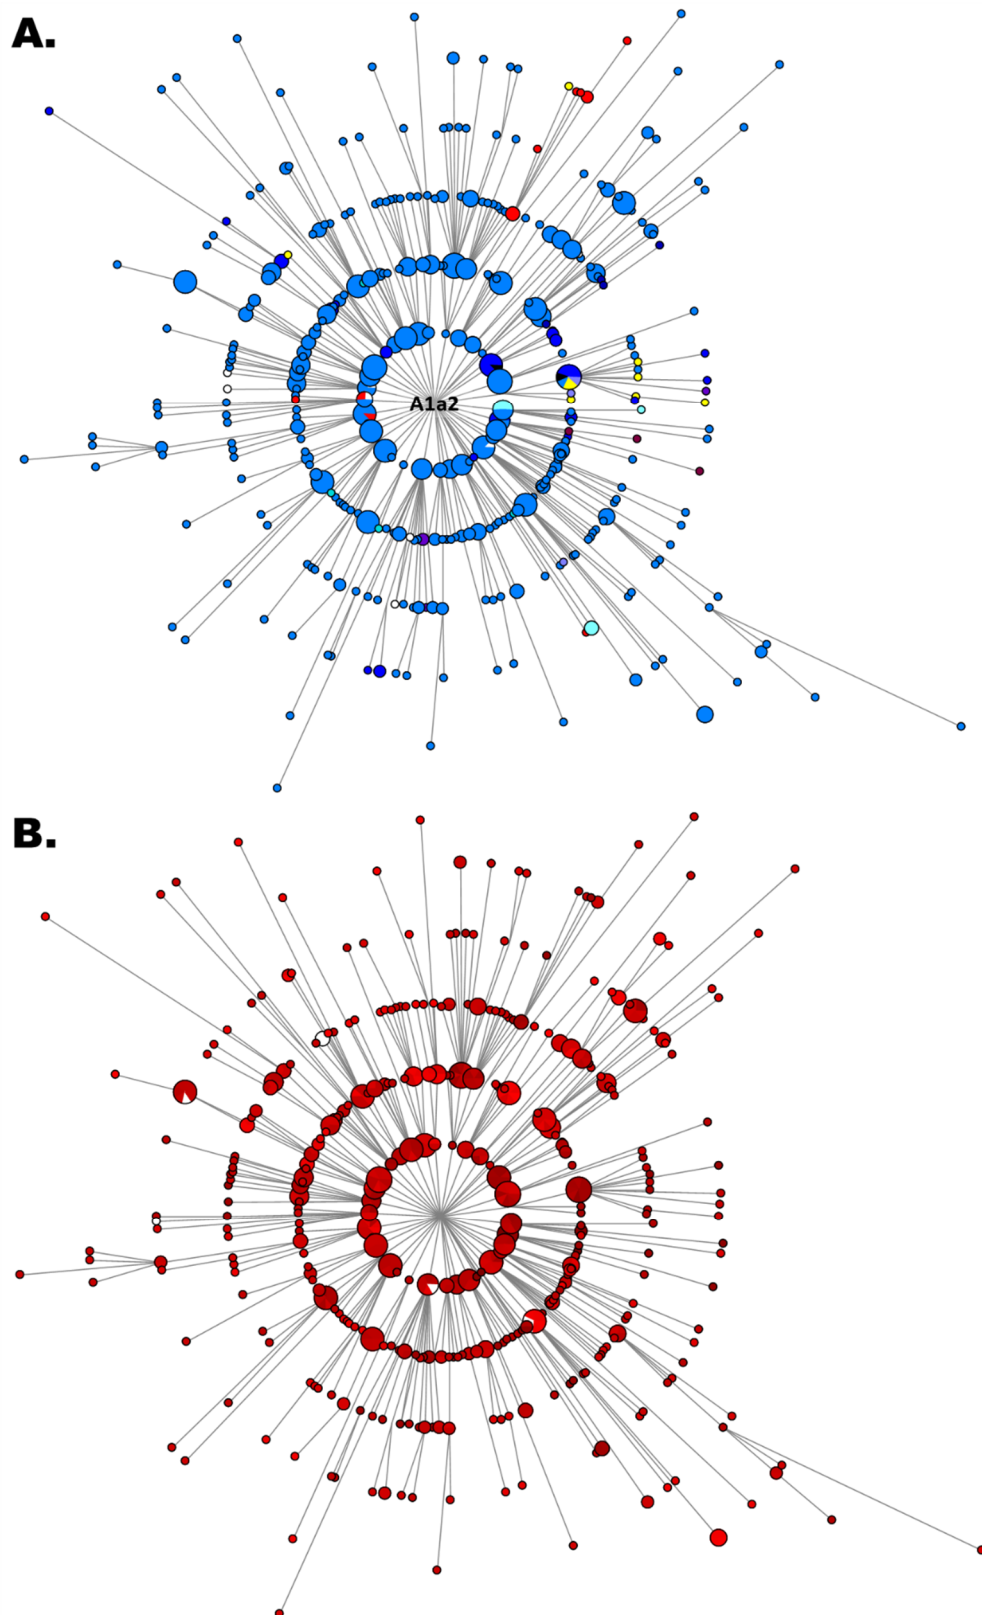

Figure S36. Reduced median network of minor subclades of A1a2. Samples are colored according to geography (A) and time of collection (B) following the legend in Figure S4.



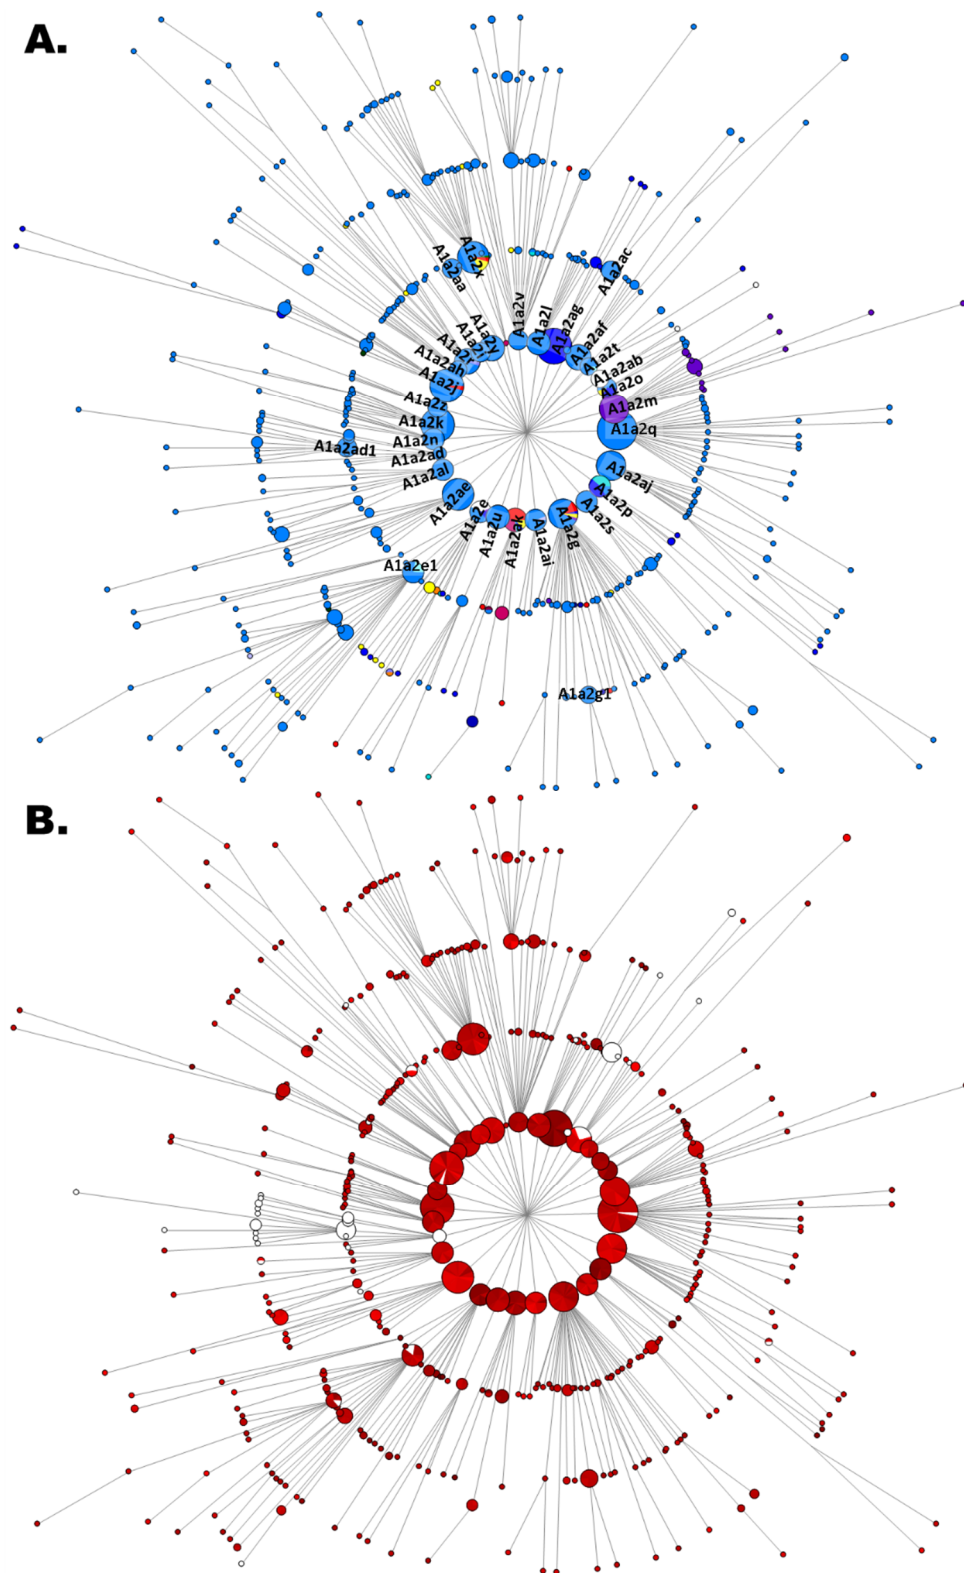

**Figure S37.** Reduced median network of subclades of A1a2. Samples are colored according to geography (A) and time of collection (B) following the legend in Figure S4.

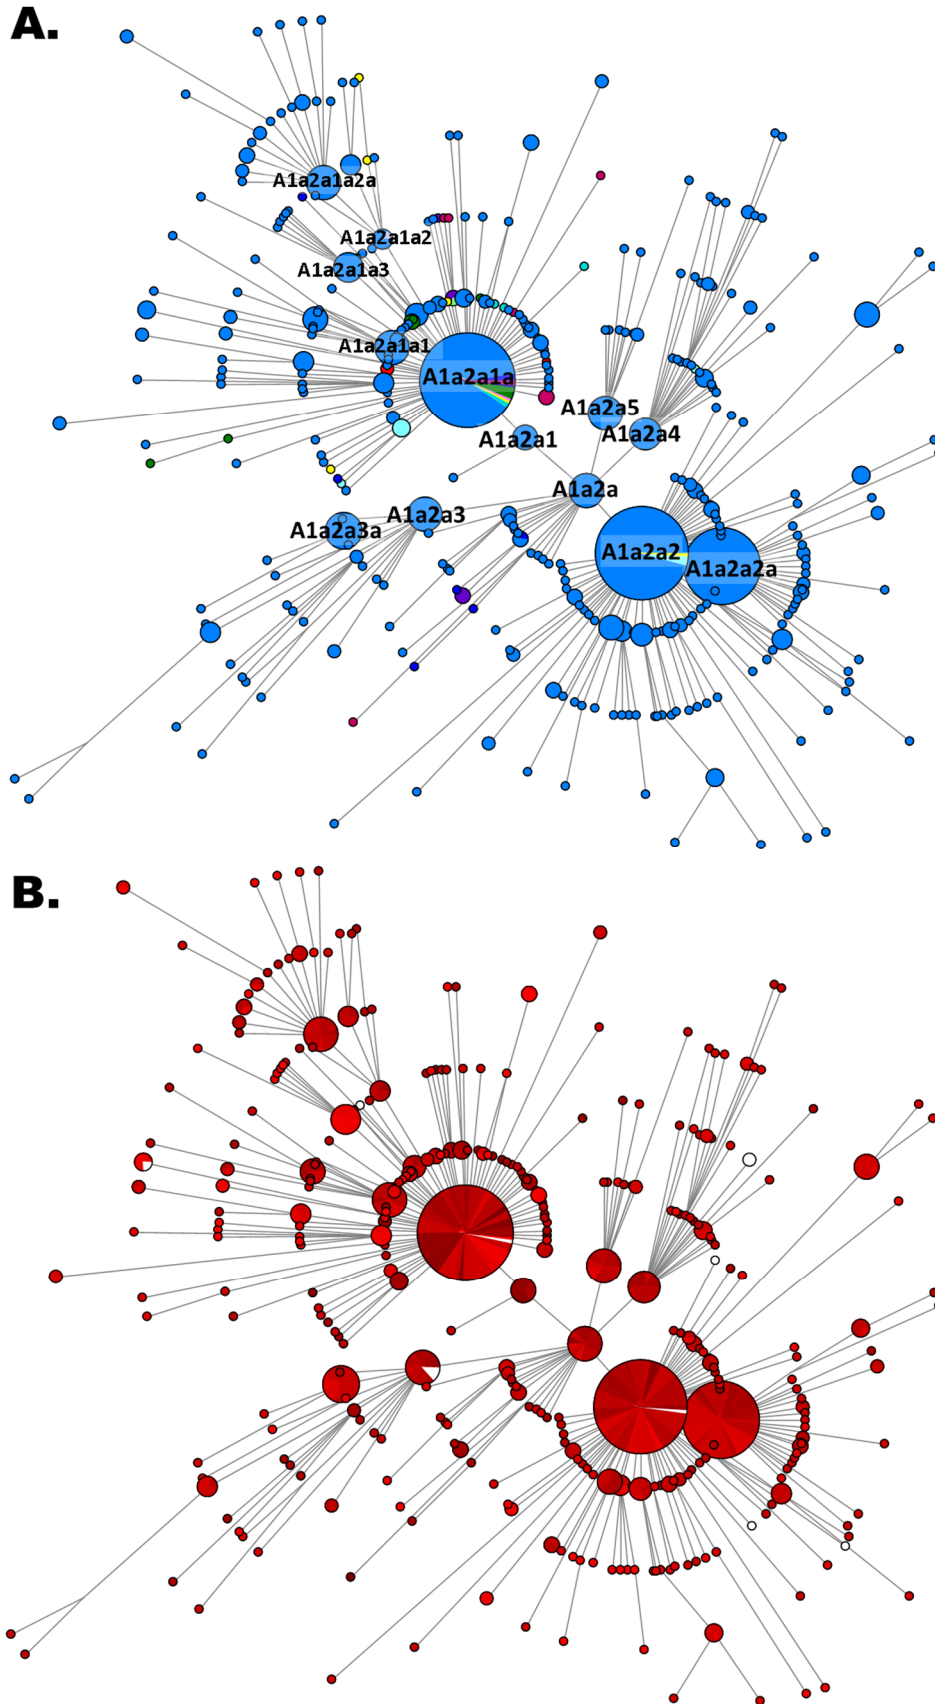

Figure S38. Reduced median network of clades of A1a2a. Samples are colored according to geography (A) and time of collection (B) following the legend in Figure S4.



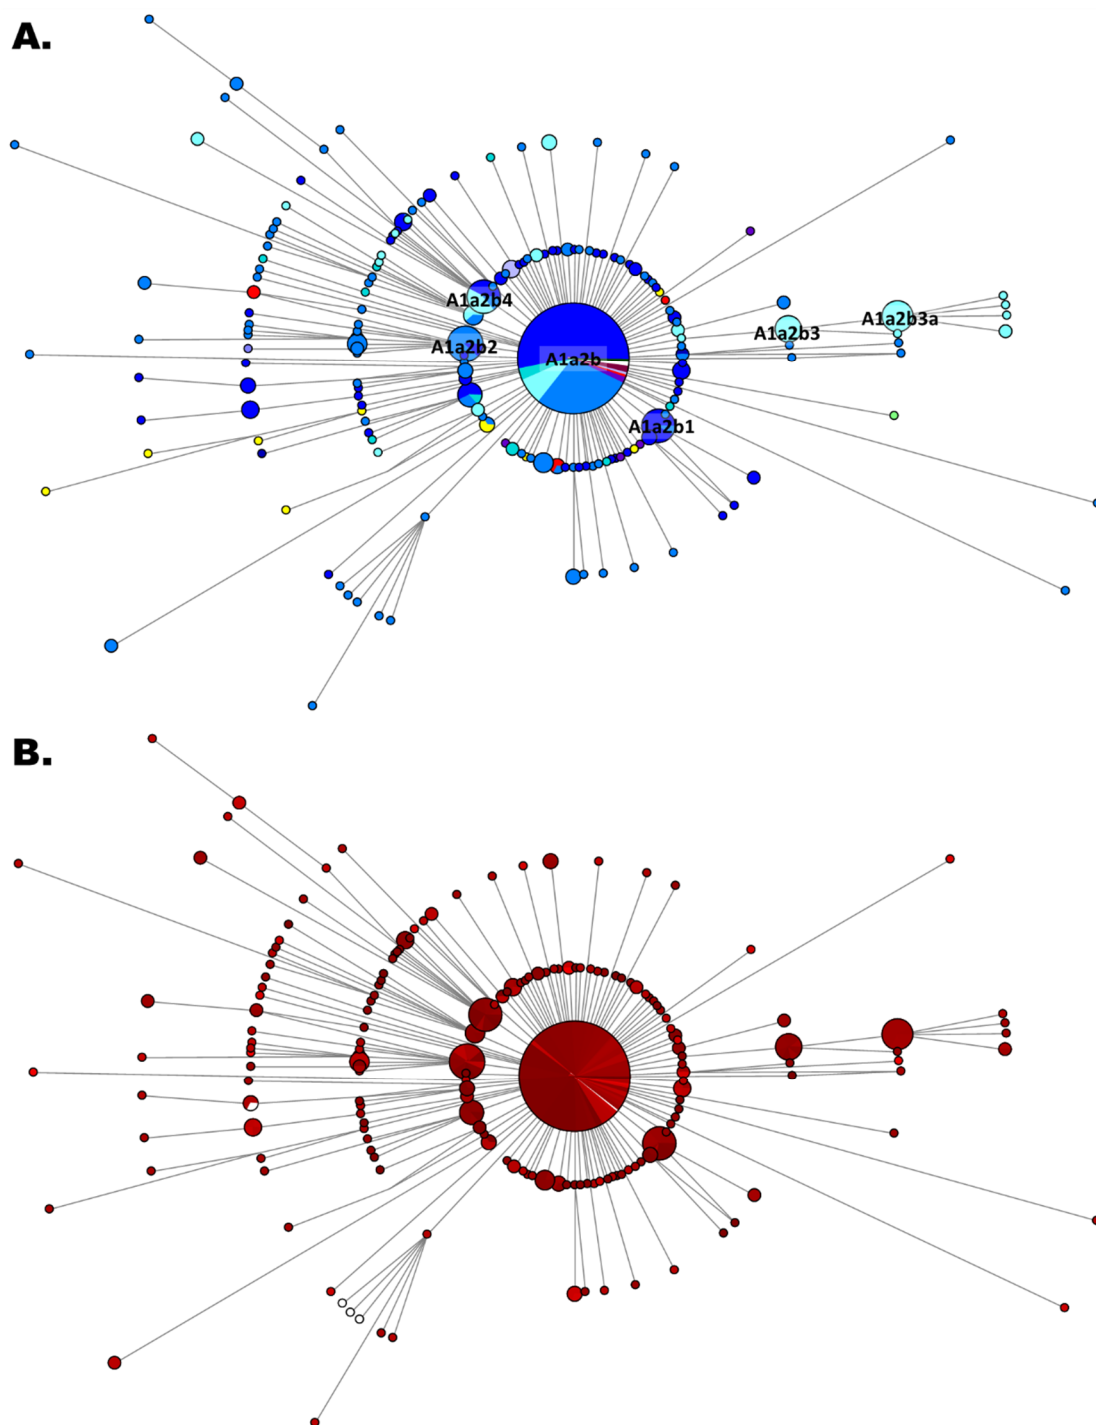

Figure S39. Reduced median network of clades of A1a2b. Samples are colored according to geography (A) and time of collection (B) following the legend in Figure S4.

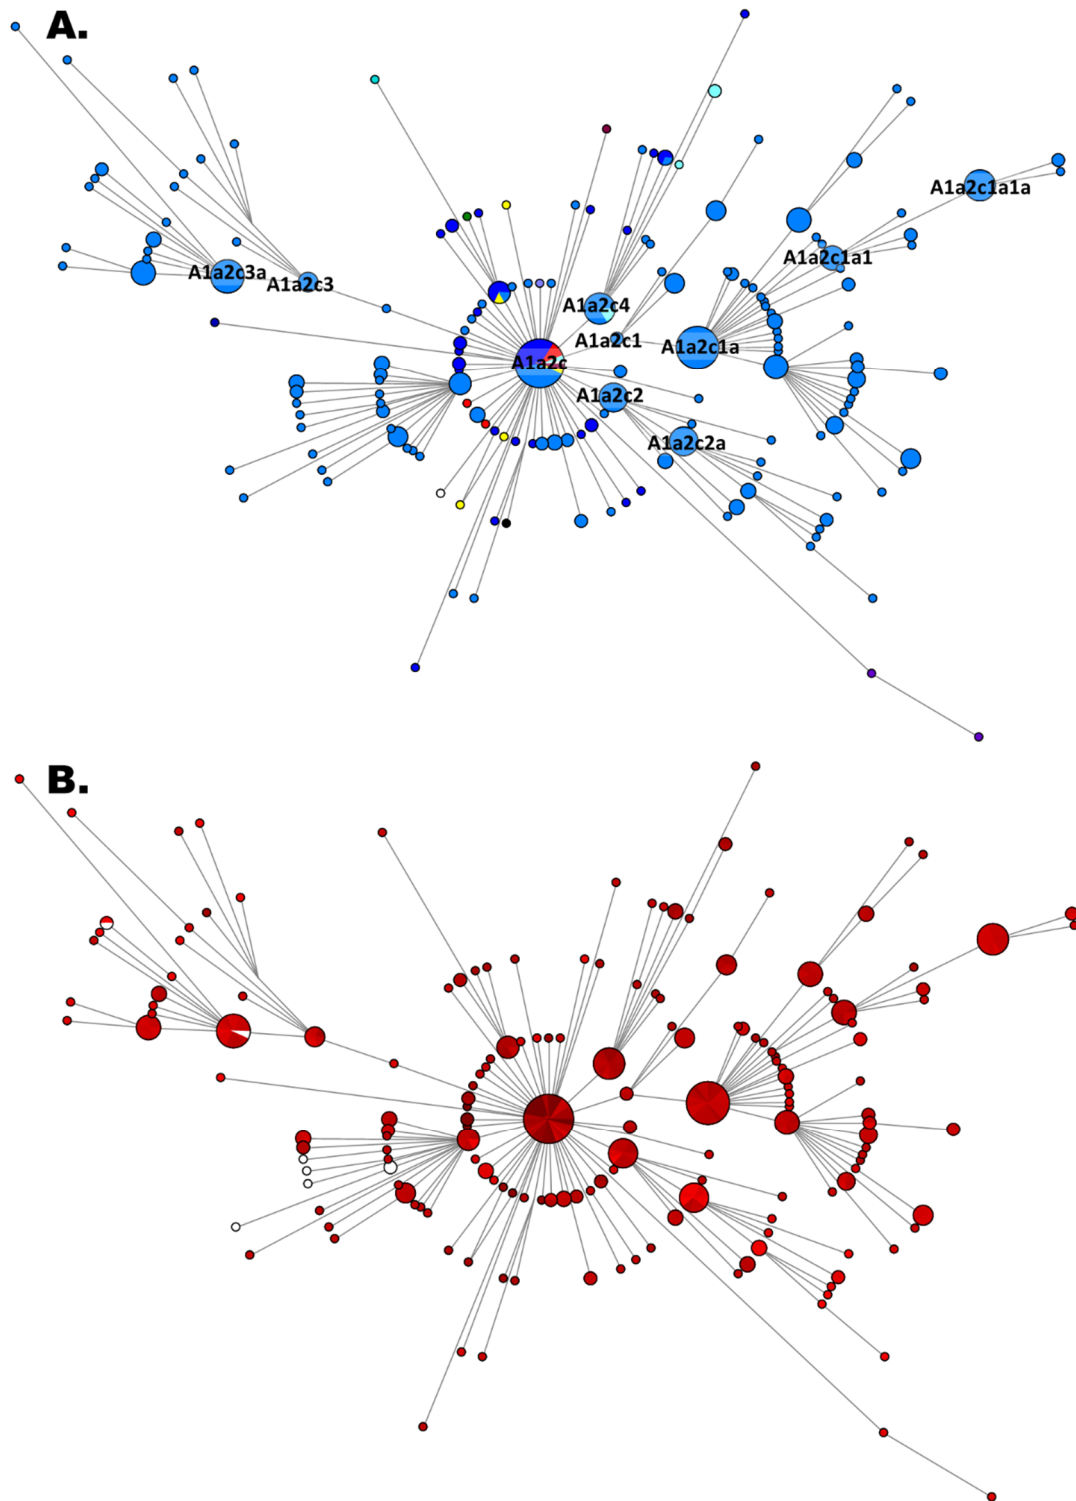

Figure S40. Reduced median network of clades of A1a2c. Samples are colored according to geography (A) and time of collection (B) following the legend in Figure S4.

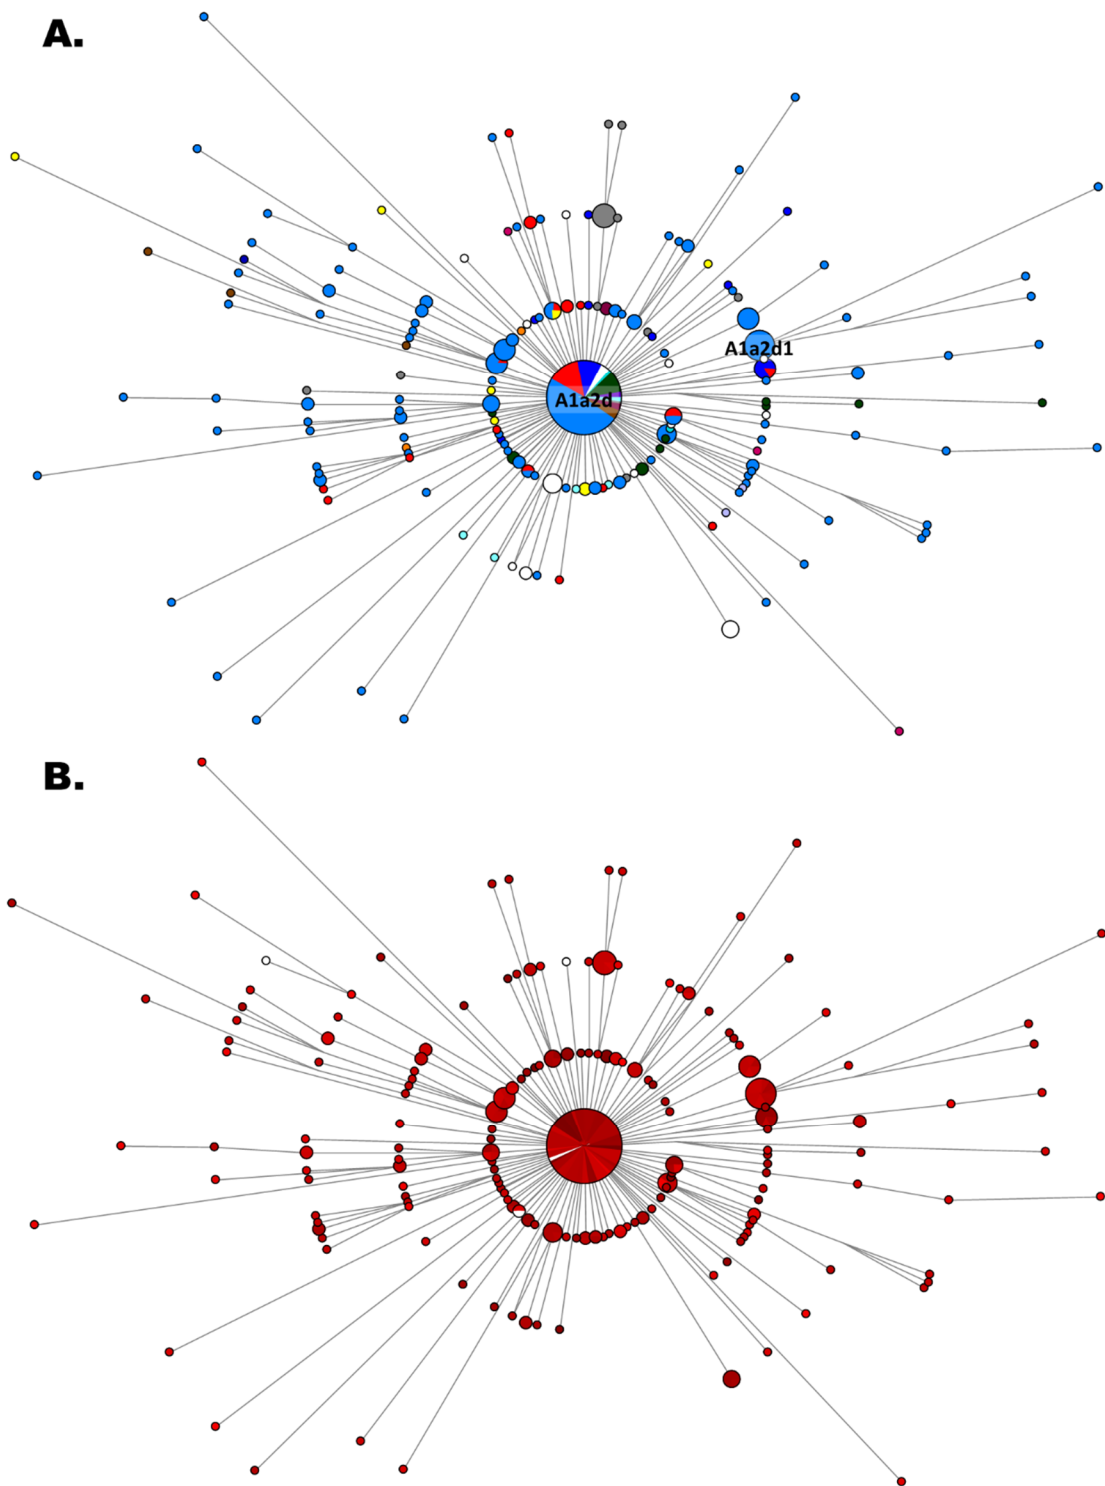

Figure S41. Reduced median network of clades of A1a2d. Samples are colored according to geography (A) and time of collection (B) following the legend in Figure S4.

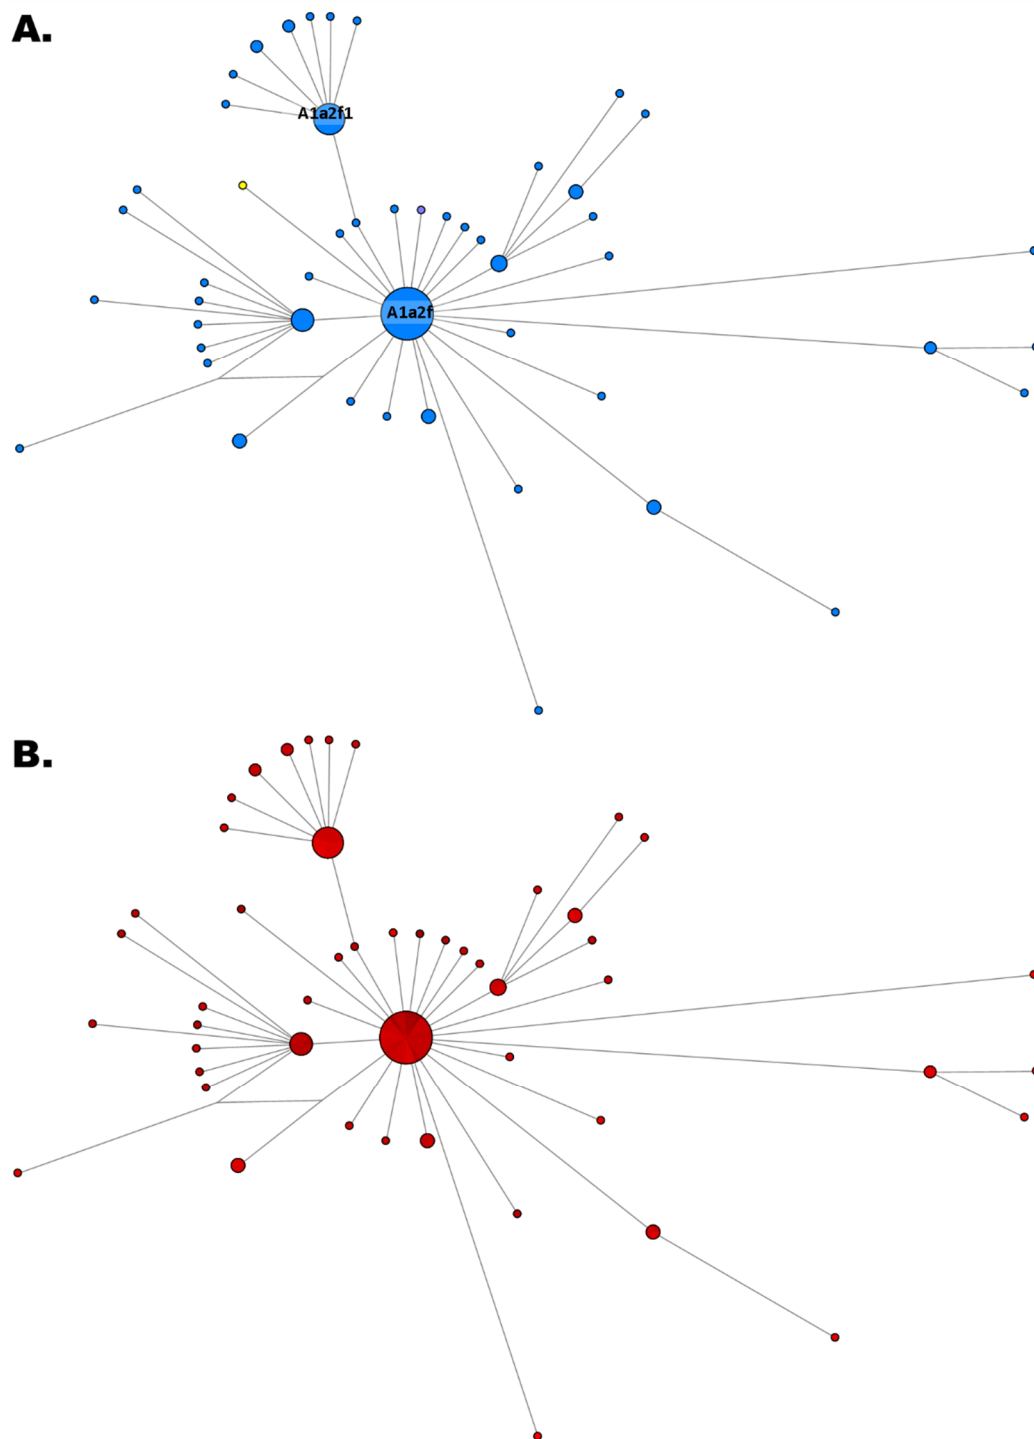

Figure S42. Reduced median network of clades of A1a2f. Samples are colored according to geography (A) and time of collection (B) following the legend in Figure S4.

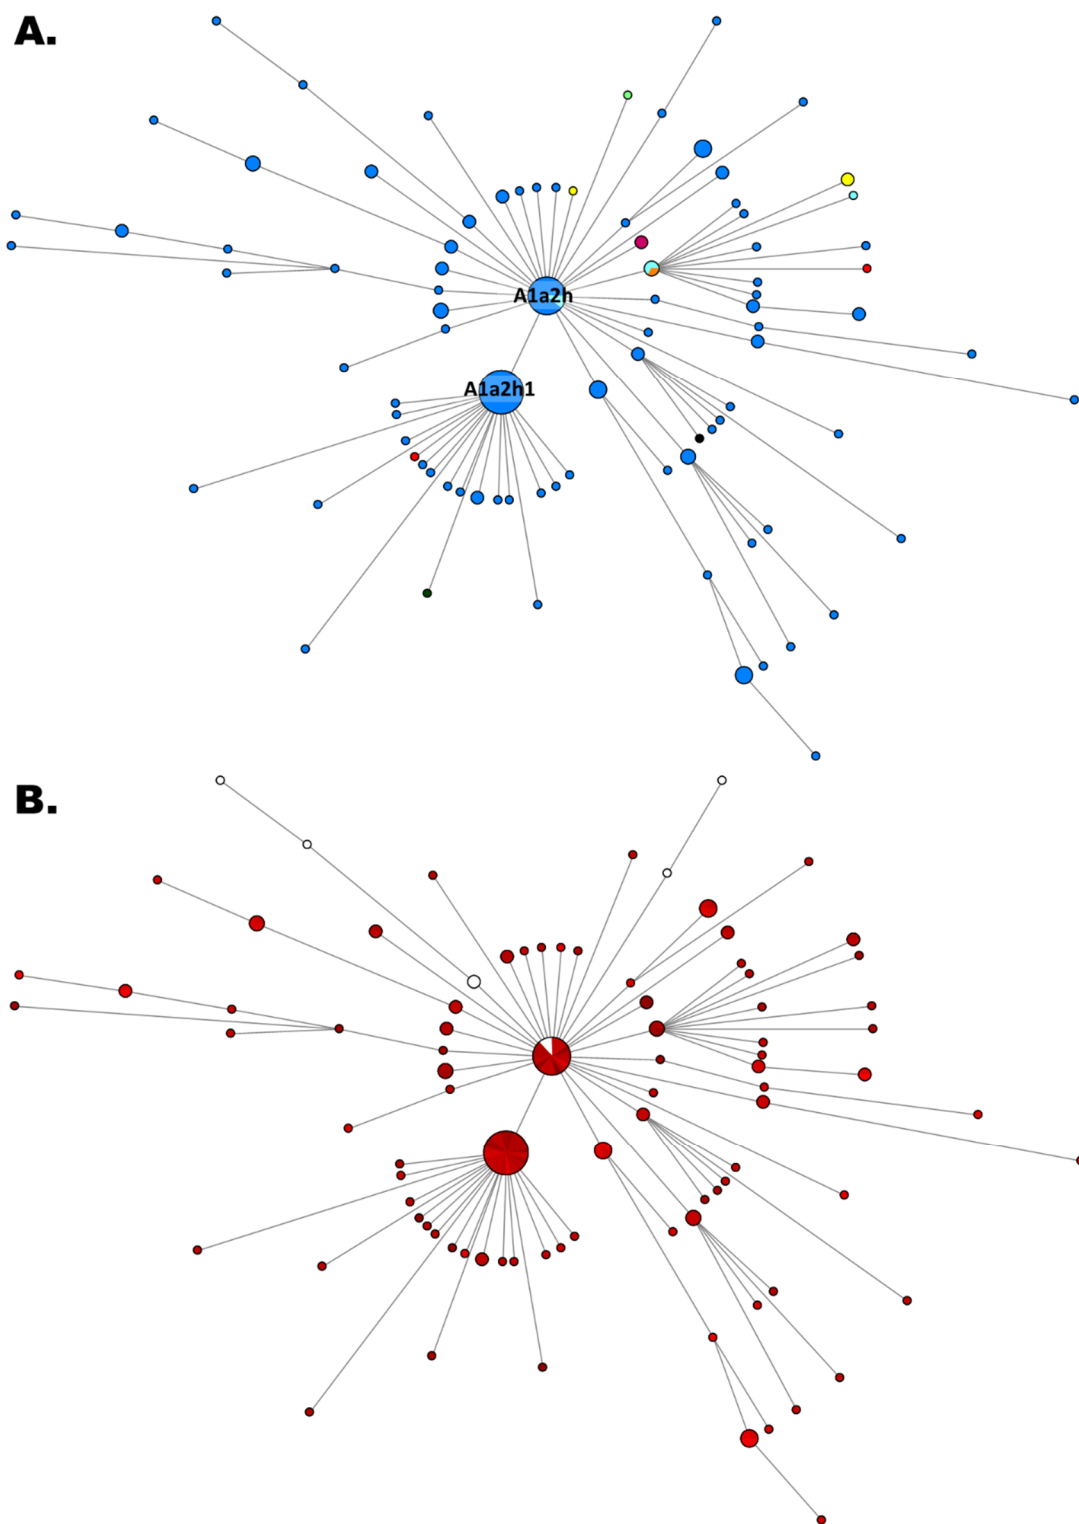

Figure S43. Reduced median network of clades of A1a2h. Samples are colored according to geography (A) and time of collection (B) following the legend in Figure S4.

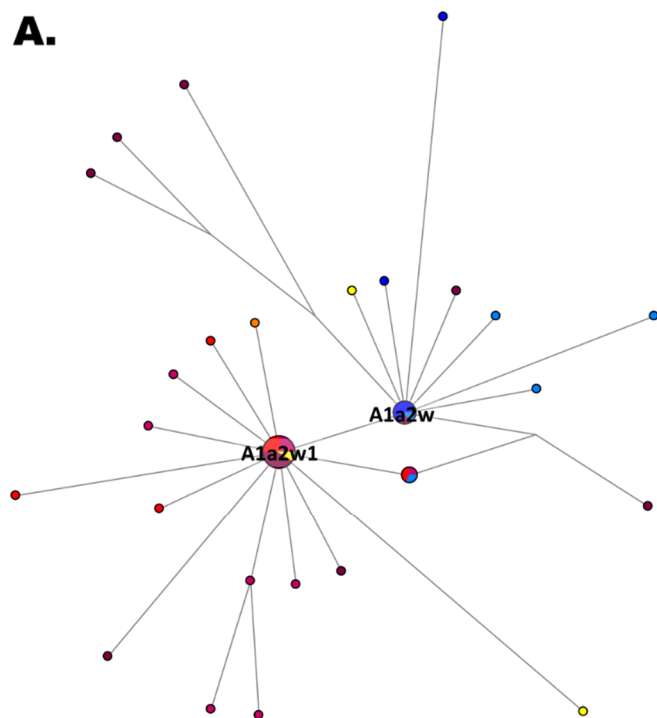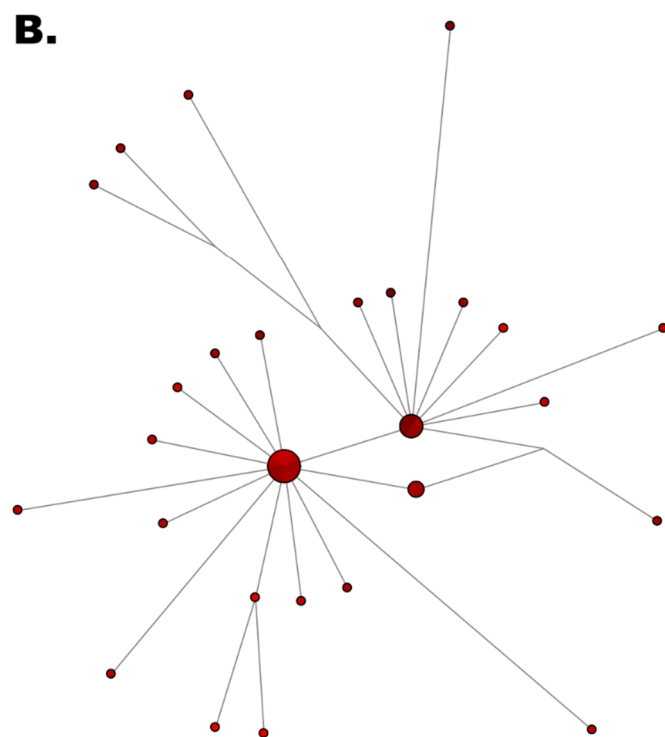

Figure S44. Reduced median network of clades of A1a2w. Samples are colored according to geography (A) and time of collection (B) following the legend in Figure S4.

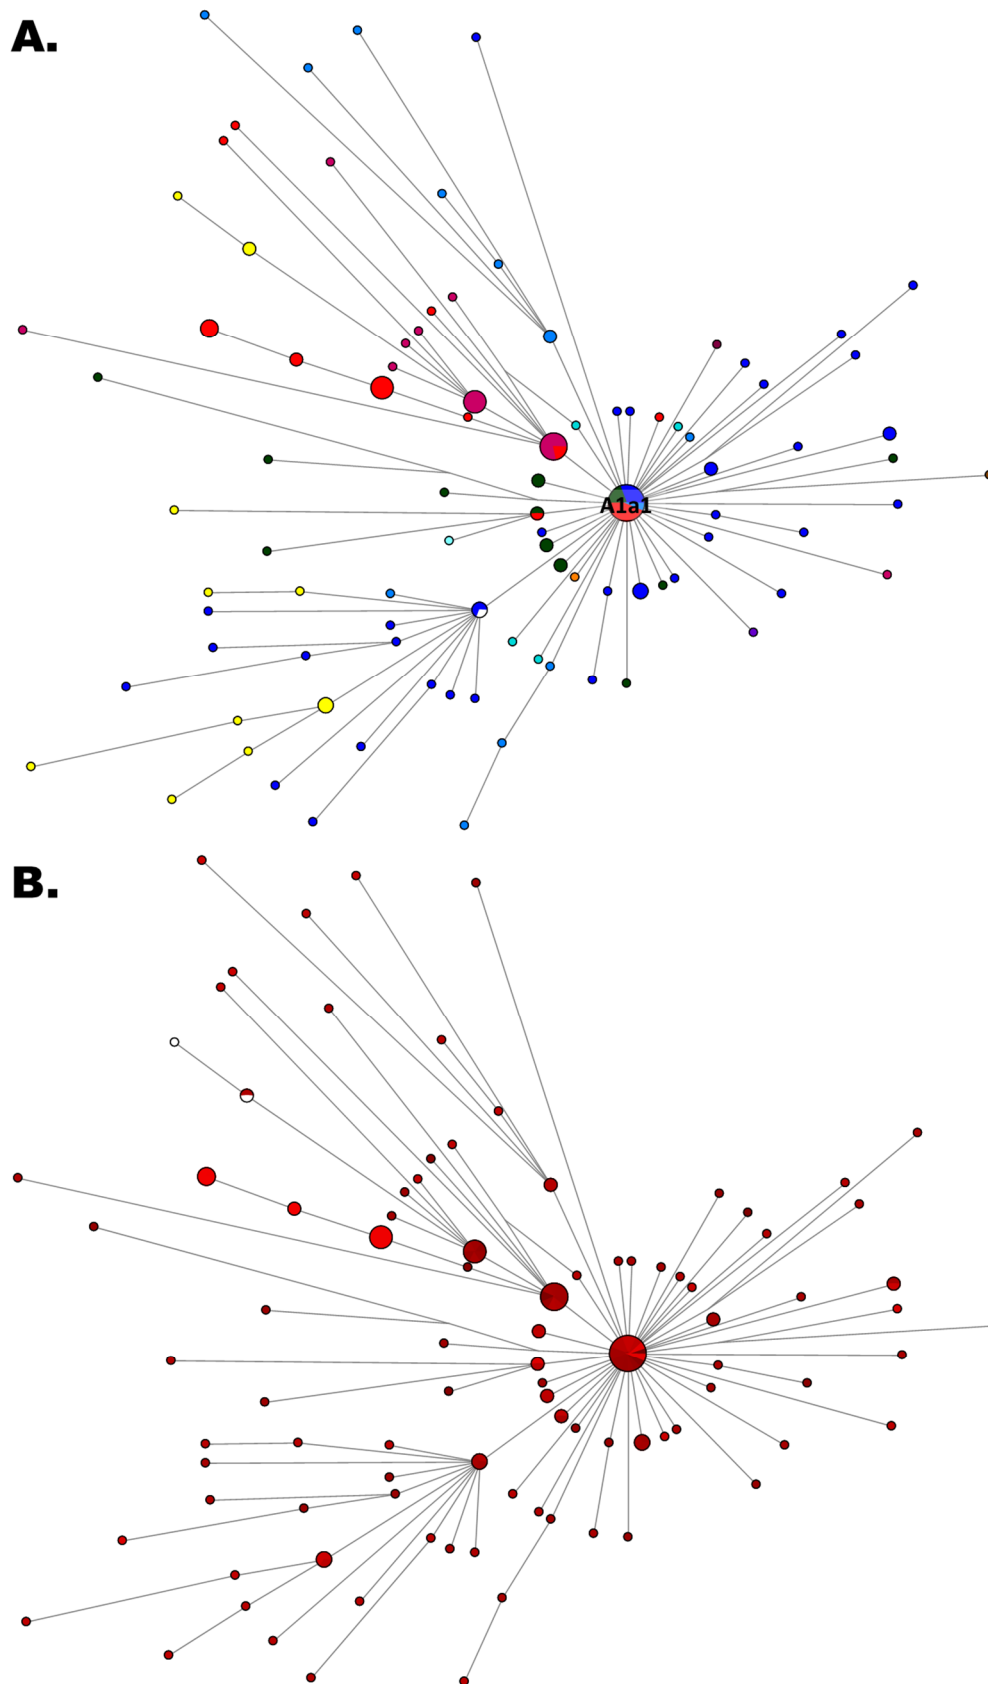

Figure S45. Reduced median network of clades of paragon A1a1. Samples are colored according to geography (A) and time of collection (B) following the legend in Figure S4.

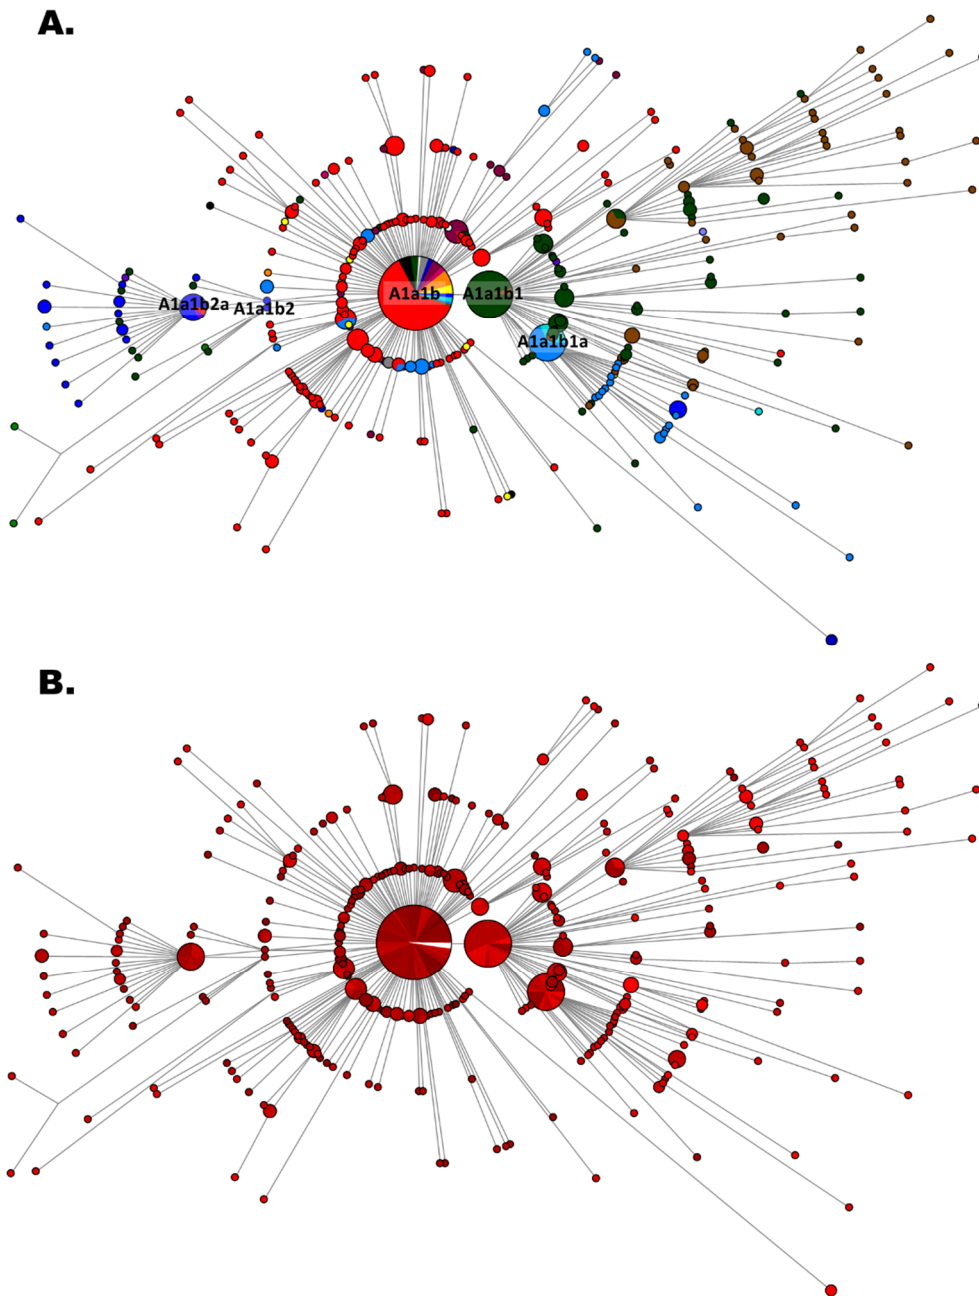

Figure S46. Reduced median network of clades of clade A1a1b. Samples are colored according to geography (A) and time of collection (B) following the legend in Figure S4.



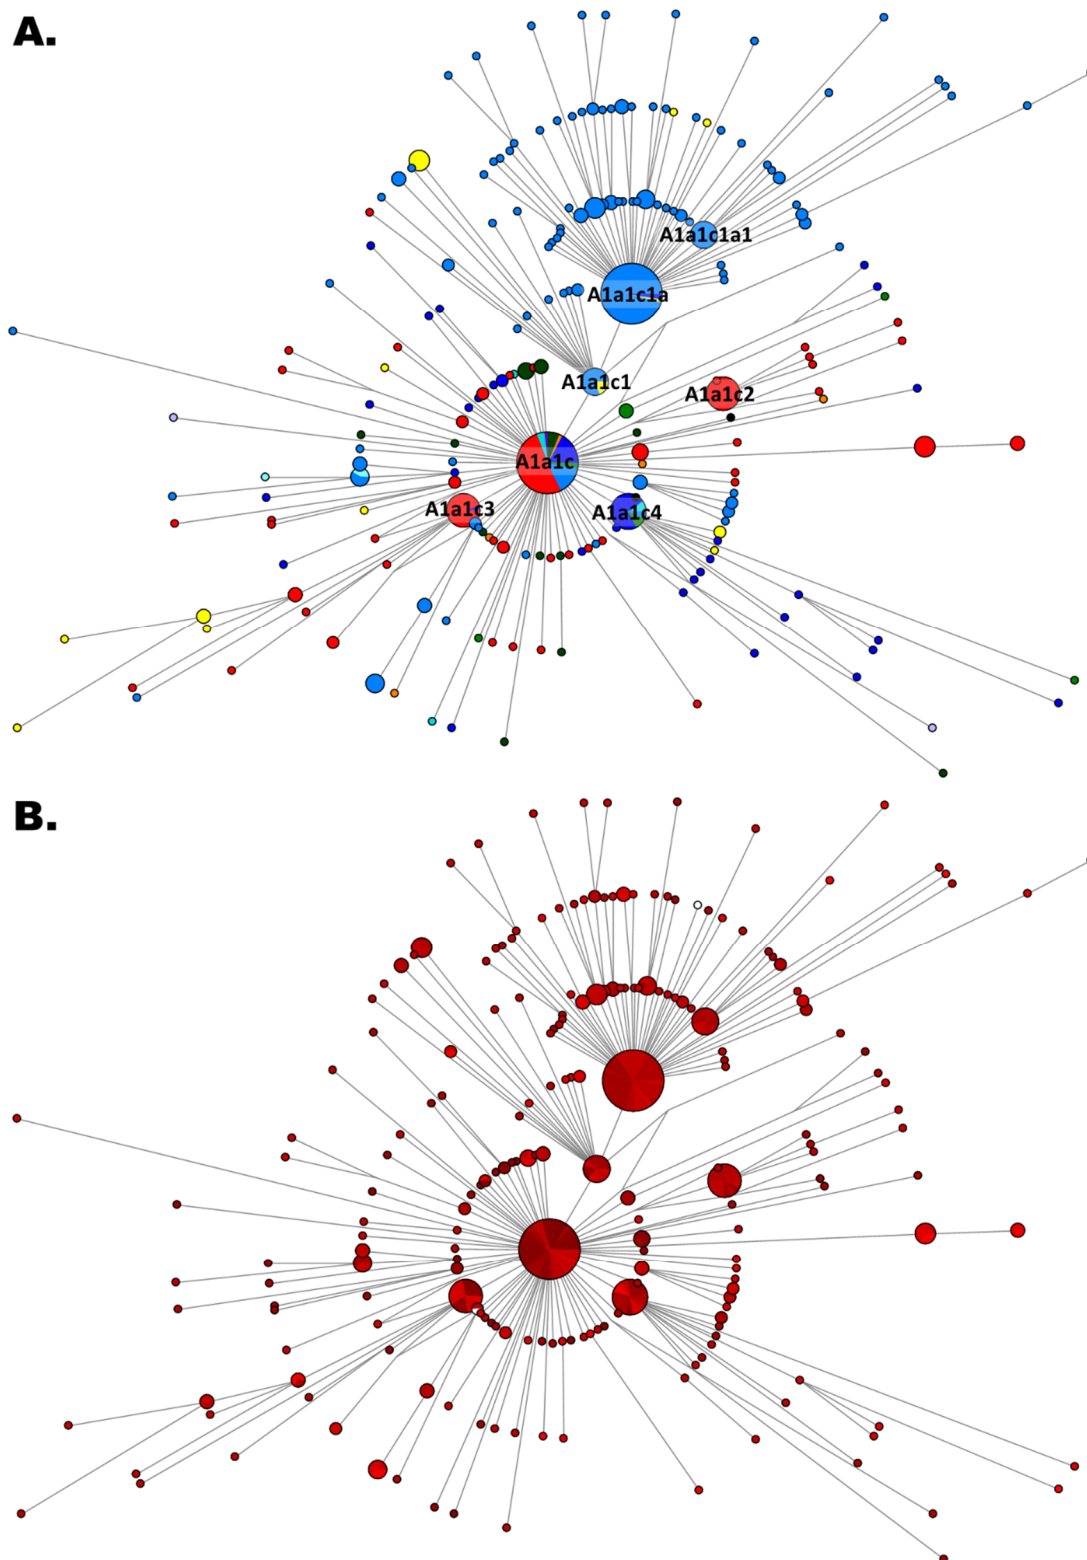

Figure S47. Reduced median network of clades of A1a1c. Samples are colored according to geography (A) and time of collection (B) following the legend in Figure S4.

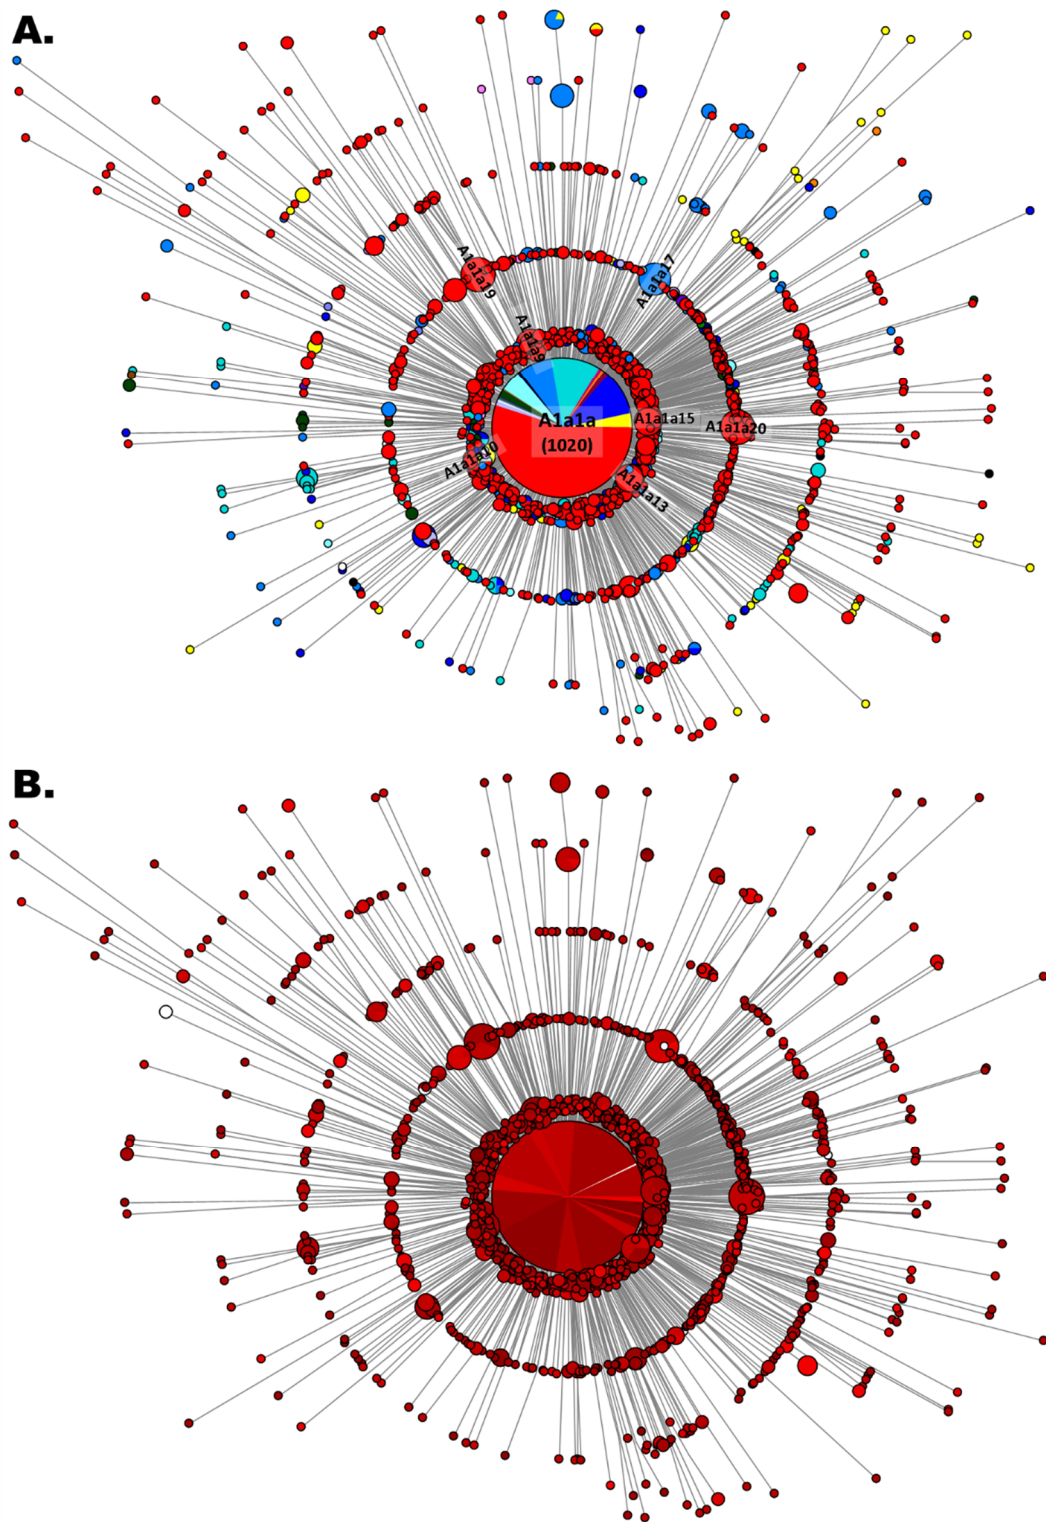

**Figure S48.** Reduced median network of paragroup A1a1a. The value between brackets refers to the total number of samples in the largest haplotype that is not proportional to the sample size. Samples are colored according to geography (A) and time of collection (B) following the legend in Figure S4.

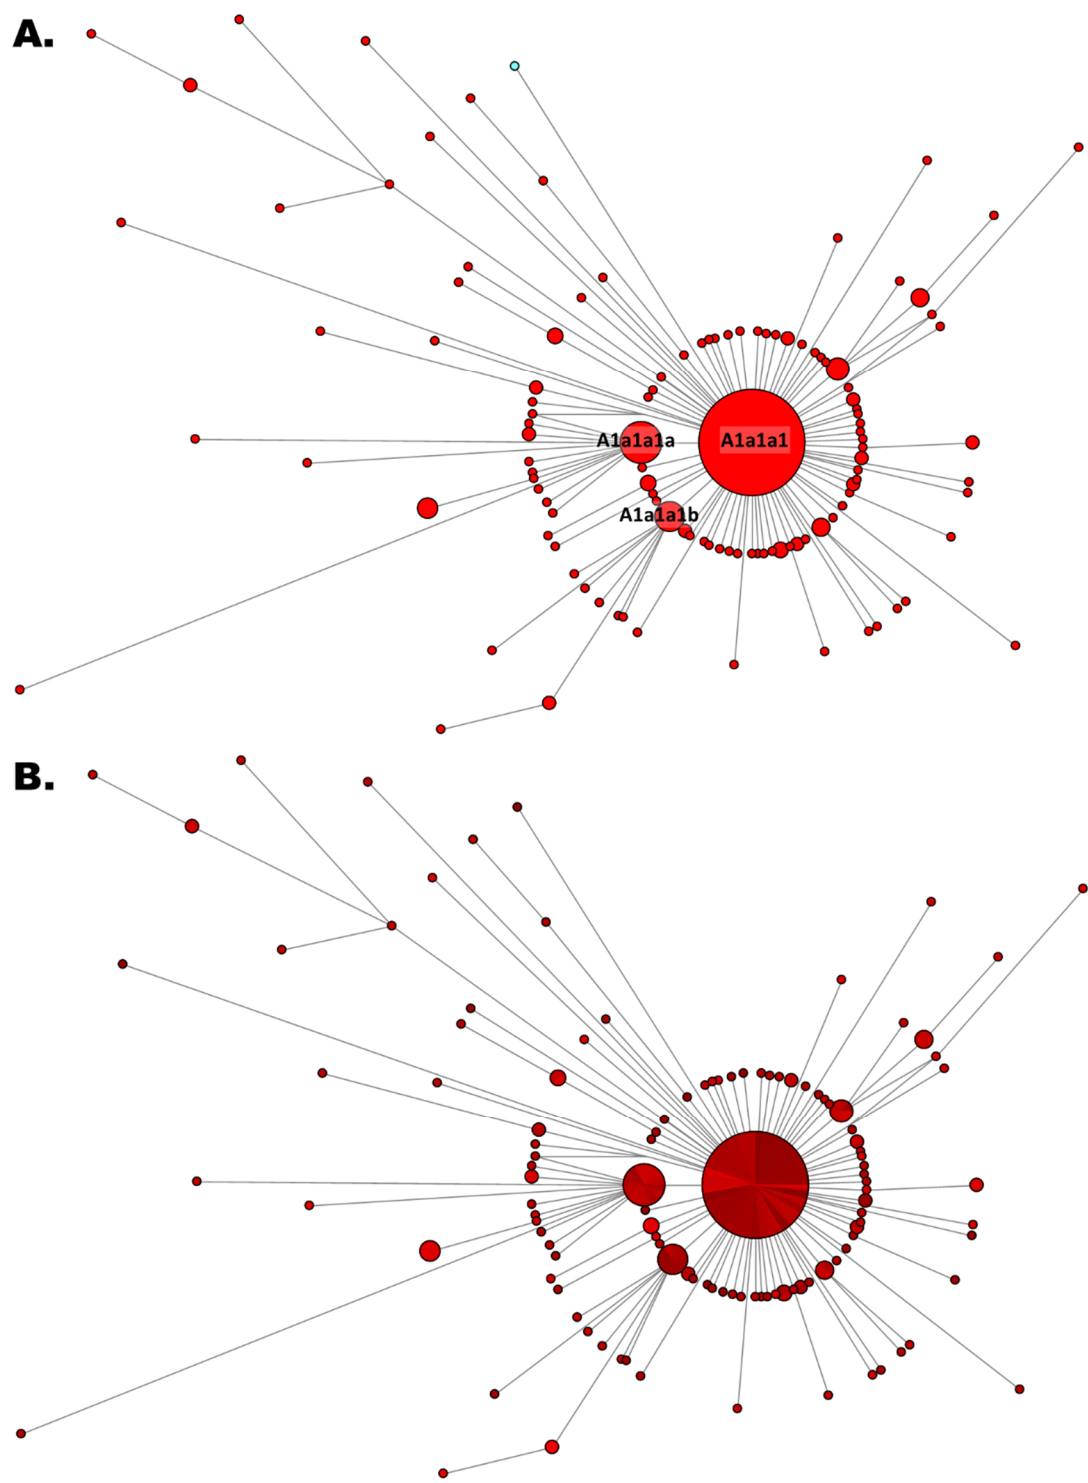

Figure S49. Reduced median network of clades of A1a1a1. Samples are colored according to geography (A) and time of collection (B) following the legend in Figure S4.

**A.**

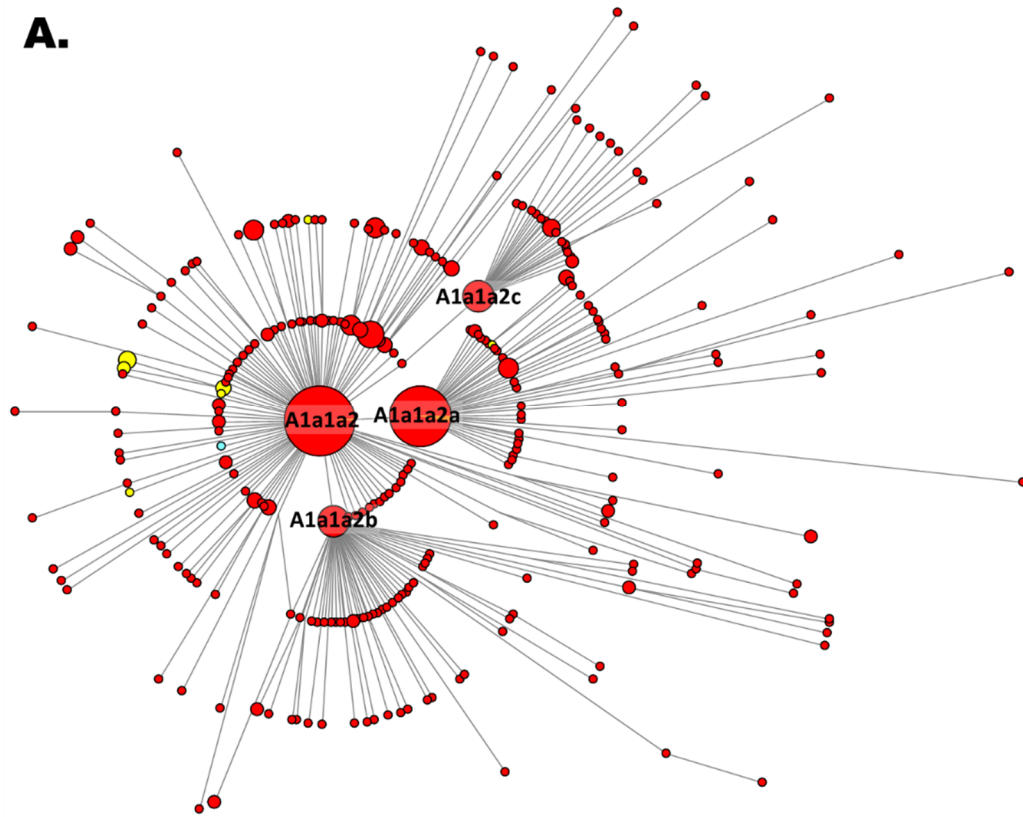

**B.**

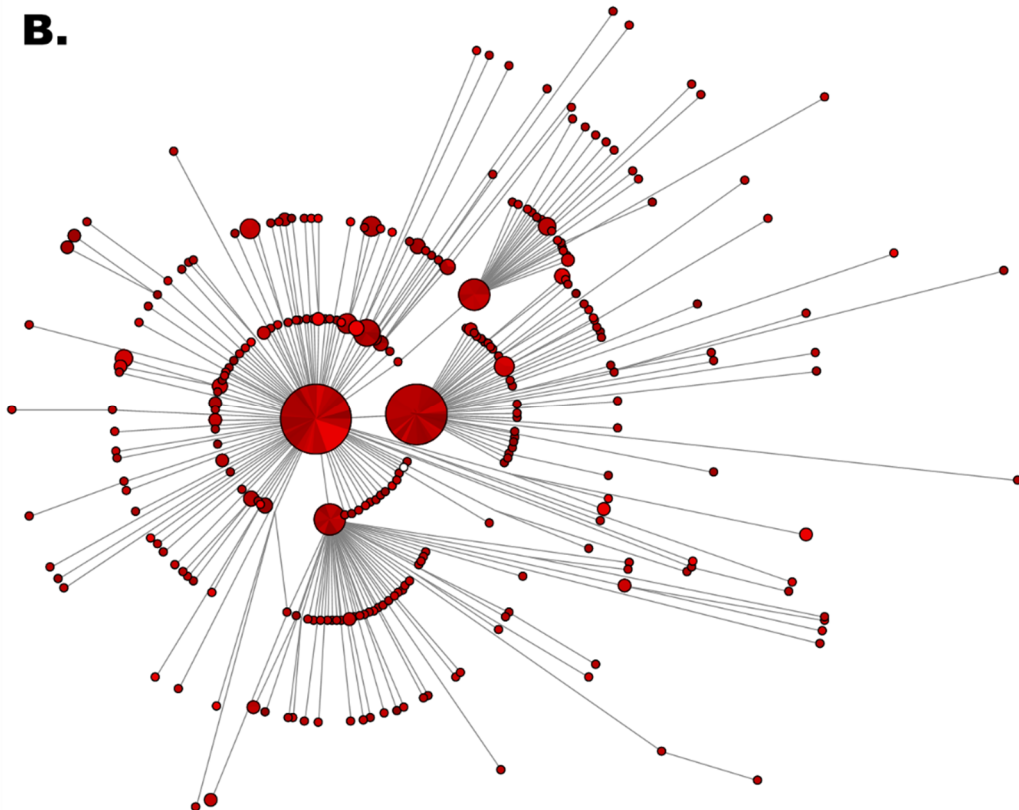

Figure S50. Reduced median network of clades of A1a1a2. Samples are colored according to geography (A) and time of collection (B) following the legend in Figure S4.

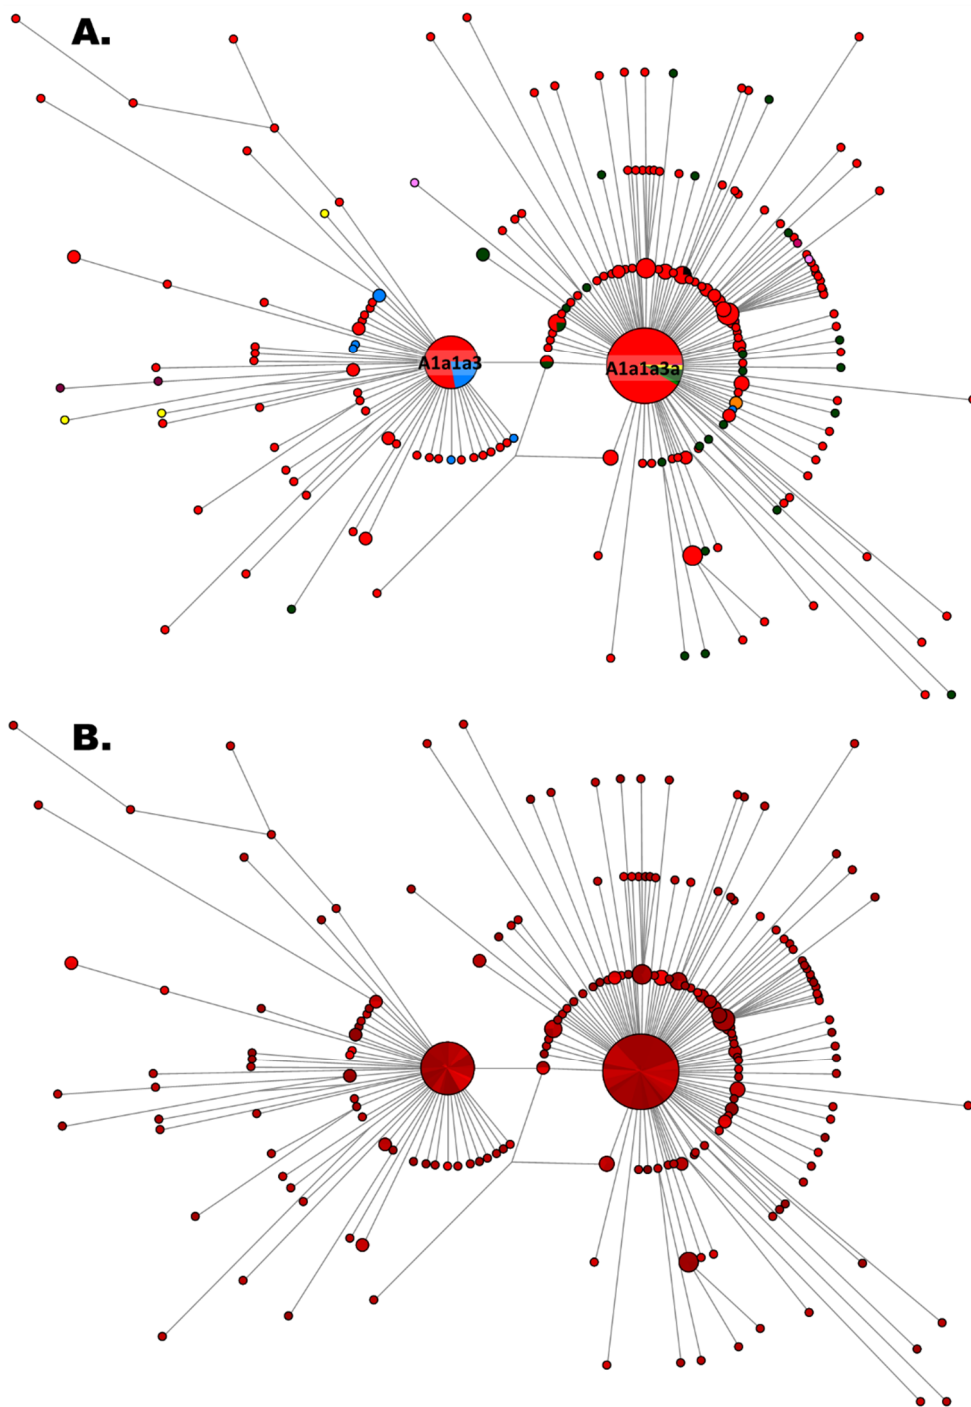

**Figure S51. Reduced median network of clades of clade A1a1a3. Samples are colored according to geography (A) and time of collection (B) following the legend in Figure S4.**



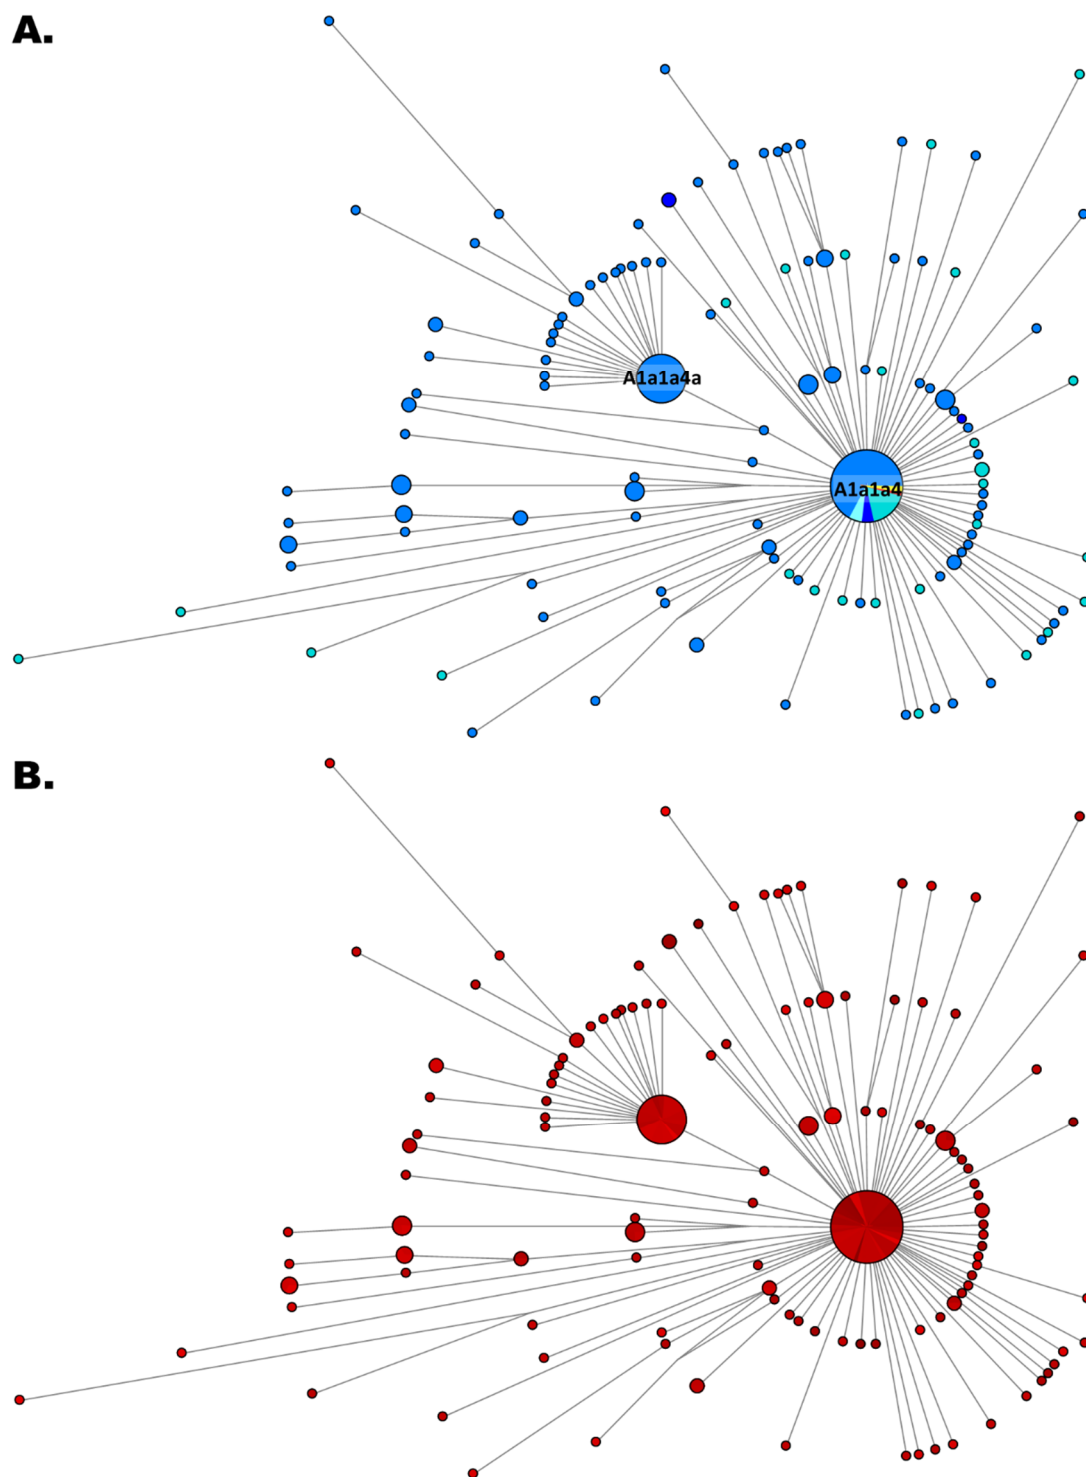

Figure S52. Reduced median network of clades of A1a1a4. Samples are colored according to geography (A) and time of collection (B) following the legend in Figure S4.

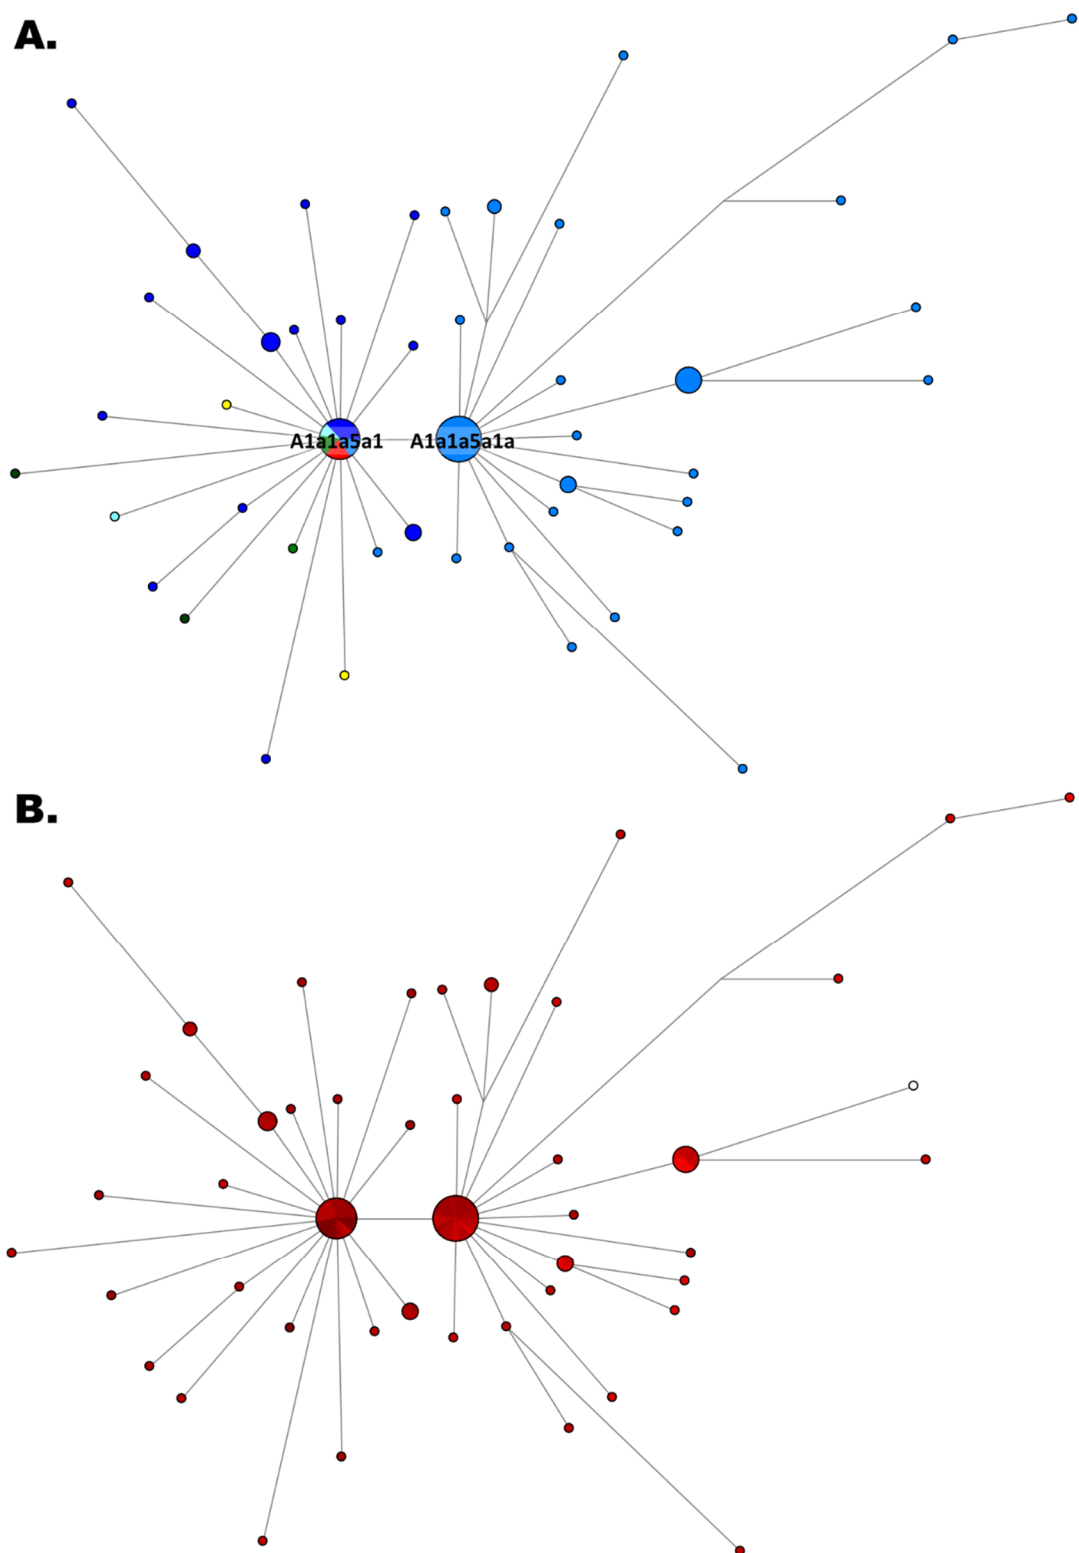

Figure S53. Reduced median network of clades of A1a1a5a1. Samples are colored according to geography (A) and time of collection (B) following the legend in Figure S4.

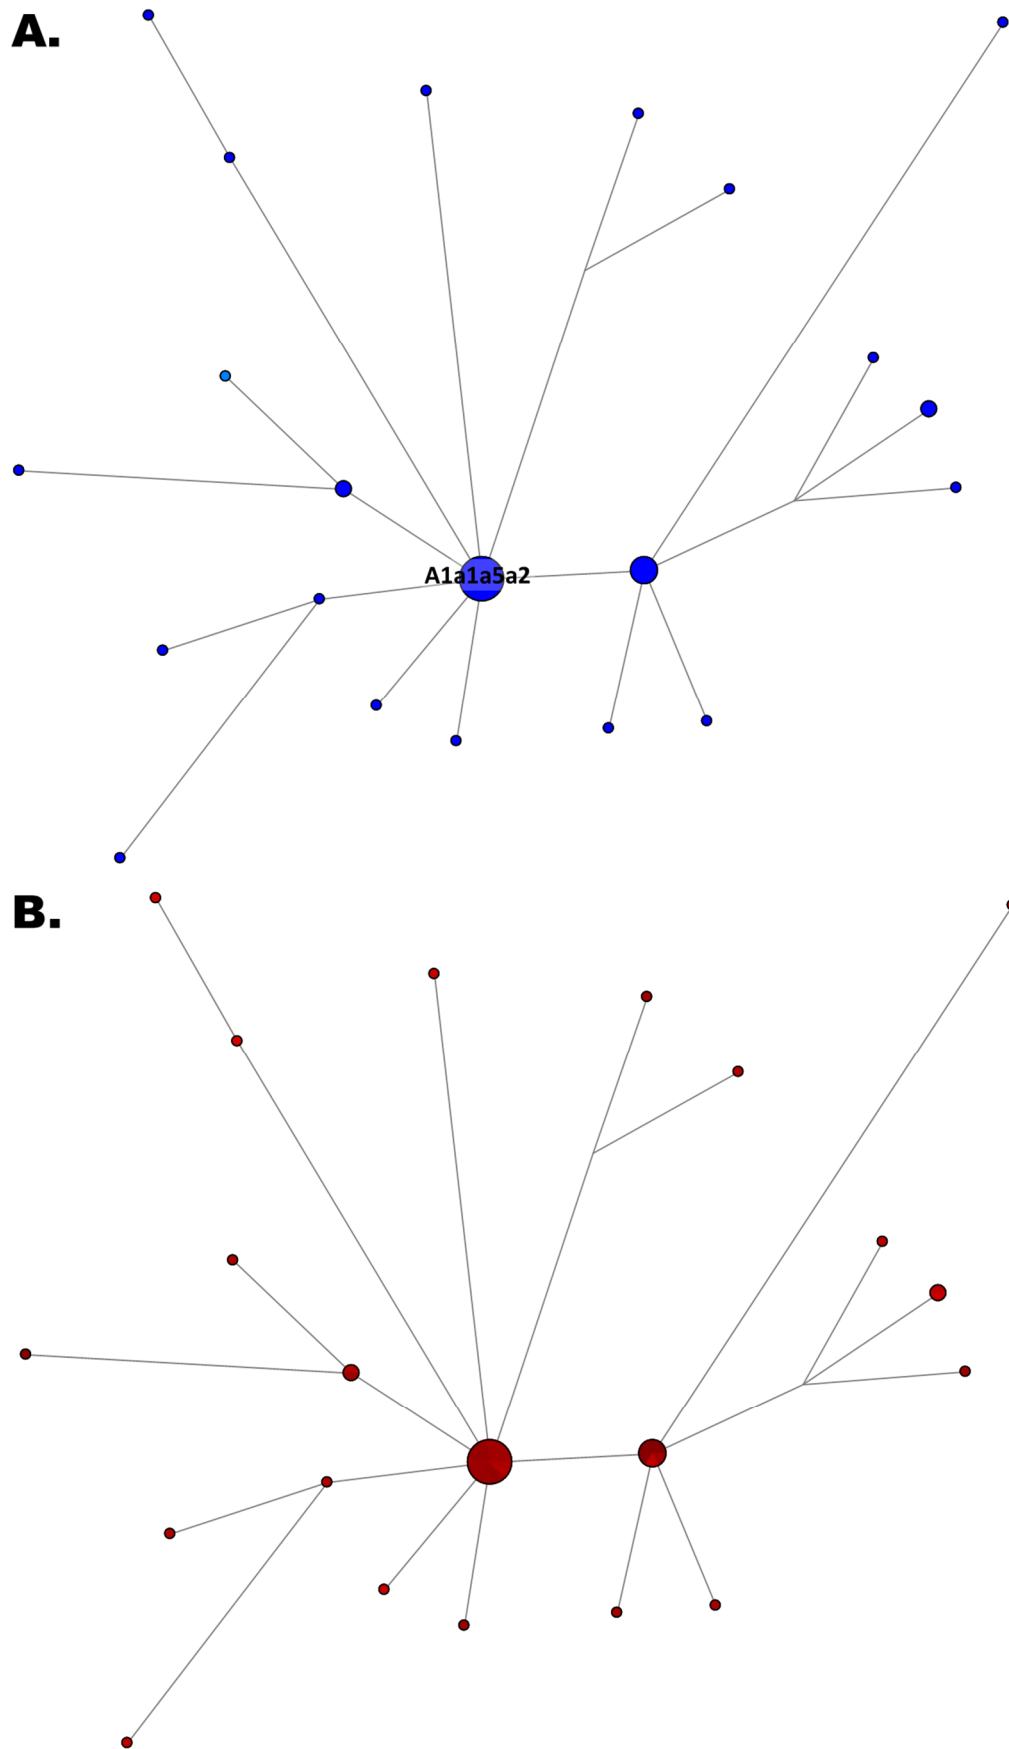

Figure S54. Reduced median network of clades of clade A1a1a5a2. Samples are colored according to geography (A) and time of collection (B) following the legend in Figure S4.



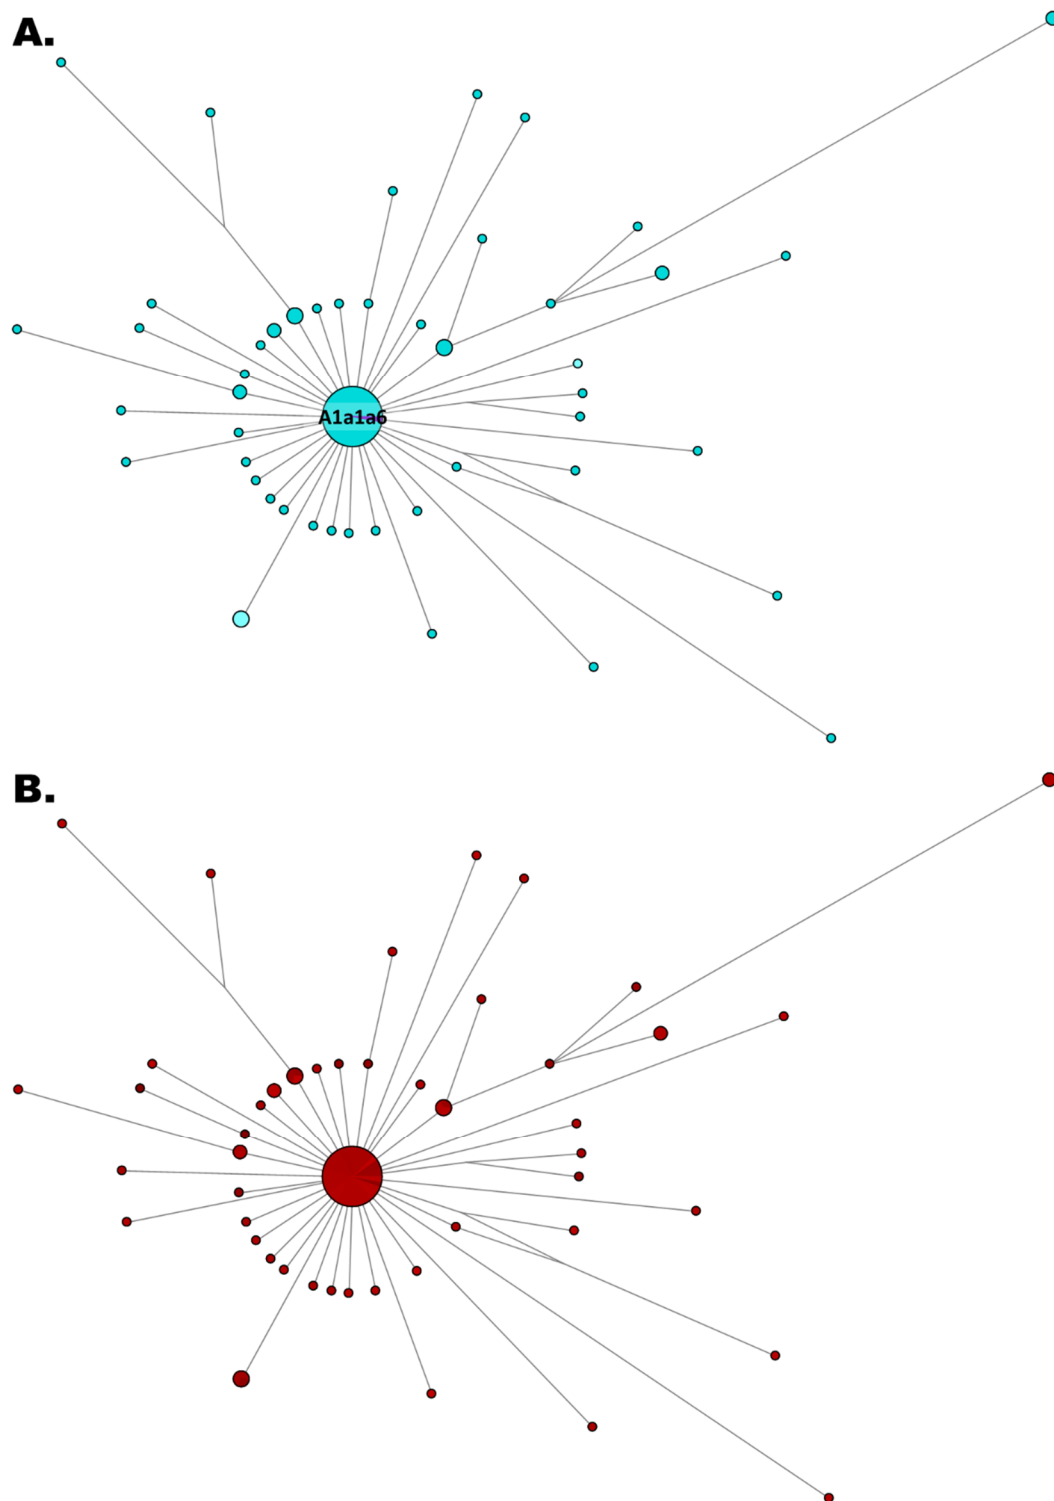

Figure S55. Reduced median network of clades of clade A1a1a6. Samples are colored according to geography (A) and time of collection (B) following the legend in Figure S4.

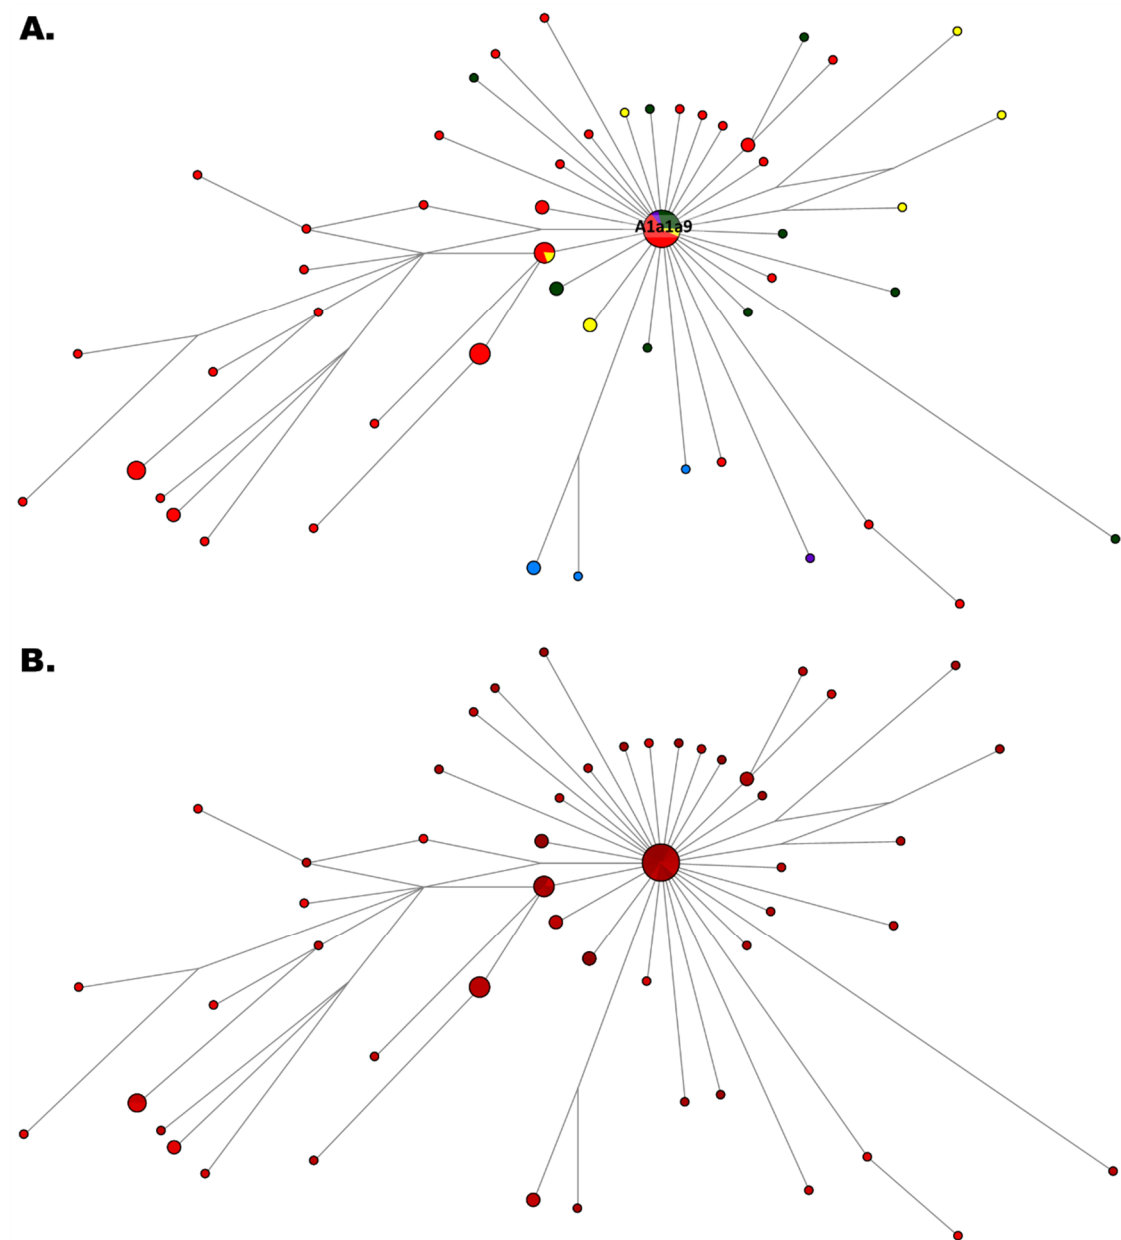

**Figure S56. Reduced median network of clades of clade A1a1a9. Samples are colored according to geography (A) and time of collection (B) following the legend in Figure S4.**

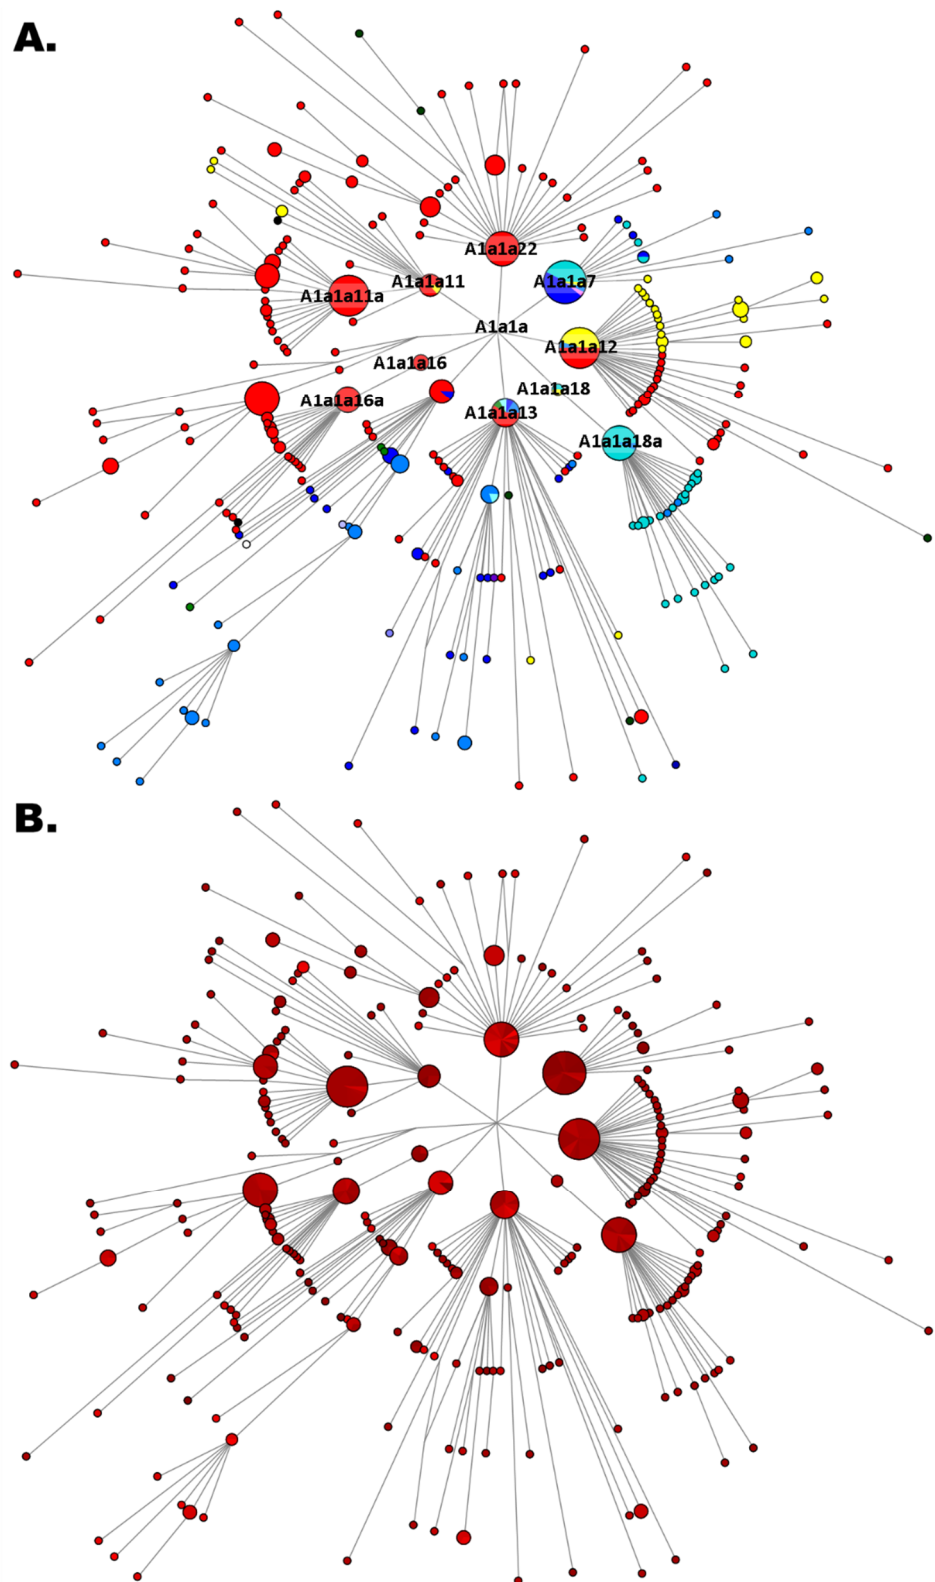

Figure S57. Reduced median network of subclades of clade A1a1a. Samples are colored according to geography (A) and time of collection (B) following the legend in Figure S4.
